# Supplementary material for: Enantioselective [2 + 2] cycloaddition of N-allenamides with cyclic N-sulfonylketimines: access to polysubstituted azetidines bearing quaternary stereocenters
Source: PubMed Central journal article supplement — Chem Sci. 2017 Jan 19;8(4):2811–5. doi: 10.1039/c6sc05450a (PMC5427681; doi:10.1039/c6sc05450a), 2017-01-19
Supplement: SC-008-C6SC05450A-s001.pdf [file SC-008-C6SC05450A-s001.pdf]

## Supporting Information for:

# Enantioselective [2+2] Cycloaddition of *N*-Allenamides with Cyclic *N*-Sulfonylketimines: Access to Polysubstituted Azetidines Bearing Quaternary Stereocenters

Ren-Rong Liu, Jiang-Ping Hu, Jian-Jun Hong, Chuan-Jun Lu, Jian-Rong Gao, and Yi-Xia Jia\*

*College of Chemical Engineering, Zhejiang University of Technology, Chaowang Road 18#,  
Hangzhou 310014, China*

Email: yxjia@zjut.edu.cn

## Contents:

|                                                                              |            |
|------------------------------------------------------------------------------|------------|
| <b>1. General information .....</b>                                          | <b>S1</b>  |
| <b>2. General procedure for asymmetric [2+2] cycloaddition reaction.....</b> | <b>S2</b>  |
| <b>3. Synthetic transformations of compound 3aa.....</b>                     | <b>S82</b> |
| <b>4. Crystal report of compound 3aa.....</b>                                | <b>S89</b> |
| <b>5. References.....</b>                                                    | <b>S90</b> |

## 1. General information:

Reactions and manipulations involving organometallic or moisture sensitive compounds were carried out under dry nitrogen and glassware heated by heating gun prior to use. <sup>1</sup>H and <sup>13</sup>C NMR spectra were recorded on Bruker AVANCE III 500MHz with TMS as internal standard. Anhydrous CH<sub>2</sub>ClCH<sub>2</sub>Cl were freshly distilled over calcium hydride. Melting points were measured on a Buchi Melting Point B-545 apparatus and uncorrected. Commercial reagents were used as received without further purification unless otherwise noticed. HRMS were recorded on Agilent 6210 LCT (EI source) or Waters Xevo Q-ToF Mass Spectrometer (ESI source). Optical rotations were determined using a Rudolph Autopol IV polarimeter. HPLC analyses were performed using Waters 1525 chromatography. Chiralpak AD columns were purchased from Daicel Chemical Industries, LTD. Cellulose-2 column were purchased from Phenomenex. Flash column chromatography was carried out using silica gel (200-300 mesh). *N*-allenamides **1**<sup>1</sup> and **4**,<sup>2</sup> α-ketimoesters **2**<sup>3</sup> and **6**<sup>4</sup> were synthesized according to the reported methods.

## 2. General procedure for asymmetric [2+2] cycloaddition reaction:

To a dried Schlenk tube was introduced activated 4 Å molecular sieves (100 mg), Ni(ClO<sub>4</sub>)<sub>2</sub>·H<sub>2</sub>O (7.3 mg, 0.02 mmol), and **L4** (8.0 mg, 0.024 mmol) under N<sub>2</sub>. 2.0 mL DCE was then added through a syringe. The resulting mixture was stirred at 25 °C for 1 h, after which cyclic *N*-sulfonyl α-ketiminoesters (0.2 mmol) and *N*-allenamides (0.3 mmol) were added under N<sub>2</sub>. The mixture was stirred at 25 °C until the reaction was completed (monitored by TLC). The solvent was removed under vacuum and the residue was purified by chromatography on silica gel, eluting with ethyl acetate/petroleum ether 1:3 (v/v) to afford the product.

Ethyl 2-((4-methyl-*N*-phenylphenyl)sulfonamido)-1-methylene-1,2-dihydro-8bH azeto[1,2-*b*]benzo[*d*]isothiazole-8b-carboxylate 4,4-dioxide (**3aa**)

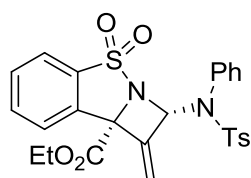

Reaction time: 5 hours. Purified by chromatography on silica gel, eluting with ethyl acetate/petroleum ether 1:3 (v/v), R<sub>f</sub>: 0.4; white solid, 82% yield, m.p. 130-132 °C, [α]<sub>D</sub><sup>15</sup> = -4.0 (c = 1.0 in CH<sub>2</sub>Cl<sub>2</sub>), 99% ee [Lux 5u Cellulose-2 column (25 cm × 0.46 cm ID), n-hexane/*i*-PrOH = 80/20, 0.7 mL/min, 254 nm; t<sub>major</sub> = 51.1 min, t<sub>minor</sub> = 47.0 min]; <sup>1</sup>H NMR (500 MHz, CDCl<sub>3</sub>): δ 7.78-7.81 (m, 1H), 7.70-7.73 (m, 2H), 7.60-7.67 (m, 3H), 7.32-7.35 (m, 1H), 7.26-7.32 (m, 6H), 6.83 (t, *J* = 2.5 Hz, 1H), 5.75 (t, *J* = 2.5 Hz, 1H), 5.43 (t, *J* = 2.5 Hz, 1H), 3.89-3.96 (m, 2H), 2.44 (s, 3H), 1.04 (t, *J* = 7.0 Hz, 3H); <sup>13</sup>C NMR (125 MHz, CDCl<sub>3</sub>): δ 166.1, 144.2, 140.9, 136.3, 135.8, 135.6, 134.2, 134.1, 133.2, 131.0, 129.4, 129.0, 128.5, 128.4, 124.6, 122.3, 114.9, 80.1, 76.1, 62.5, 21.6, 13.8. HRMS m/z (ESI<sup>+</sup>): Calculated for C<sub>26</sub>H<sub>25</sub>N<sub>2</sub>O<sub>6</sub>S<sub>2</sub> ([M+H]<sup>+</sup>) 525.1149, found 525.1148.

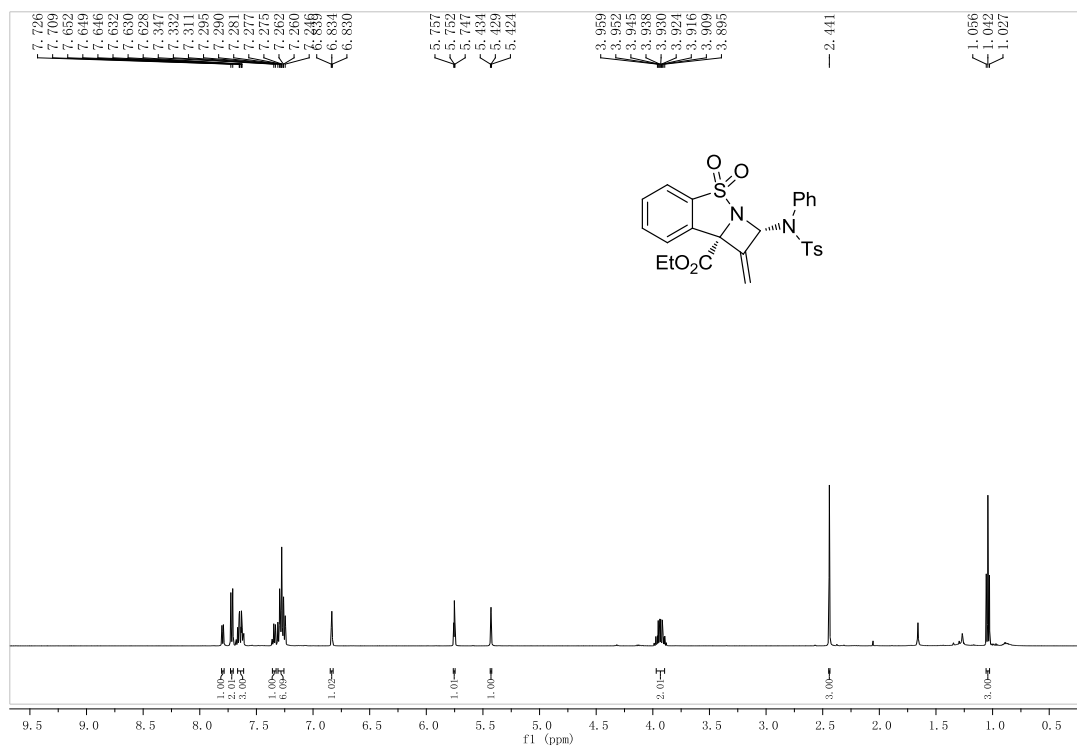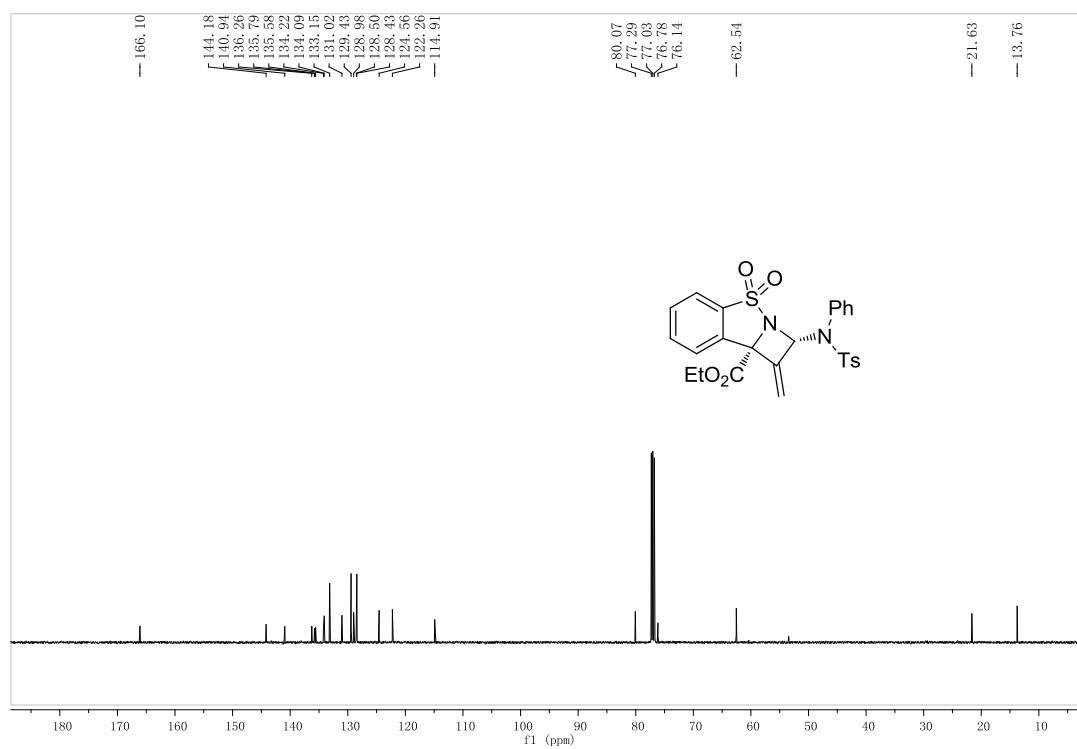

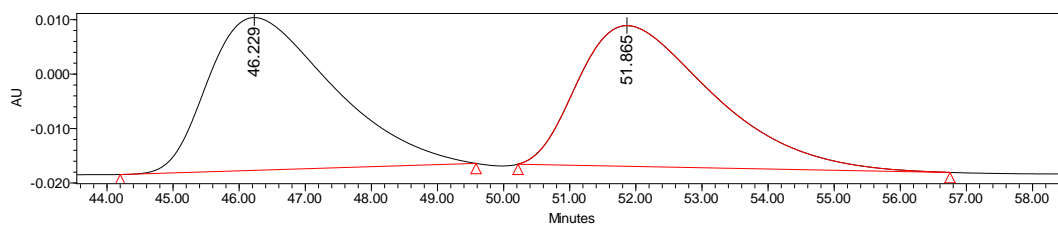

|   | Retention Time | Area    | % Area | Height | % Height |
|---|----------------|---------|--------|--------|----------|
| 1 | 46.229         | 3671118 | 50.03  | 28058  | 52.06    |
| 2 | 51.865         | 3667122 | 49.97  | 25837  | 47.94    |

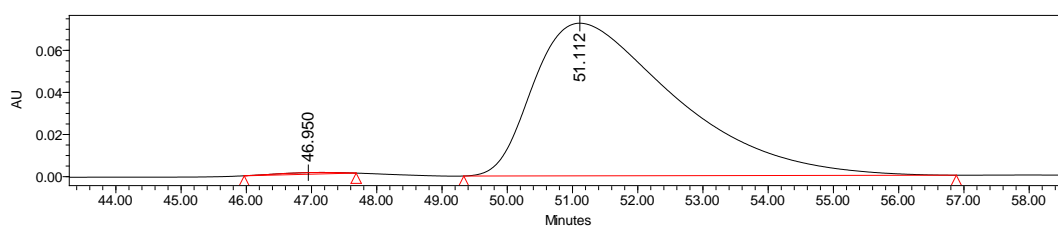

|   | Retention Time | Area     | % Area | Height | % Height |
|---|----------------|----------|--------|--------|----------|
| 1 | 46.950         | 49012    | 0.45   | 778    | 1.06     |
| 2 | 51.112         | 10959179 | 99.55  | 72531  | 98.94    |

Isopropyl 2-((4-methyl-N-phenylphenyl)sulfonamido)-1-methylene-1,2-dihydro-8bH-azeto[1,2-b]benzo[d]isothiazole-8b-carboxylate 4,4-dioxide (**3ab**)

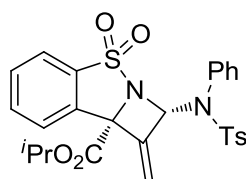

Reaction time: 5 hours. Purified by chromatography on silica gel, eluting with ethyl acetate/petroleum ether 1:3 (v/v), R<sub>f</sub>: 0.4; light yellow solid, 75% yield, m.p. 110-112 °C,  $[\alpha]_D^{15} = -1.2$  (c = 1.0 in CH<sub>2</sub>Cl<sub>2</sub>), 90% ee [Lux 5u Cellulose-2 column (25 cm × 0.46 cm ID), n-hexane/*i*-PrOH = 80/20, 0.7 mL/min, 254 nm;  $t_{\text{major}} = 48.7$  min,  $t_{\text{minor}} = 38.6$  min]; <sup>1</sup>H NMR (500 MHz, CDCl<sub>3</sub>): δ 7.79 (dd, *J* = 7.0, 1.5 Hz, 1H), 7.72 (d, *J* = 8.0 Hz, 2H), 7.58-7.67 (m, 3H), 7.26-7.34 (m, 6H), 7.25 (t, *J* = 2.5 Hz, 1H), 6.81 (t, *J* = 2.5 Hz, 1H), 5.74 (t, *J* = 2.5 Hz, 1H), 5.42 (t, *J* = 2.5 Hz, 1H), 4.76 (dt, *J* = 12.5, 6.0

Hz, 1H), 2.44 (s, 3H), 1.07 (d,  $J = 6.5$  Hz, 3H), 0.97 (d,  $J = 6.5$  Hz, 3H).  $^{13}\text{C}$  NMR (125 MHz,  $\text{CDCl}_3$ ):  $\delta$  165.2, 144.2, 141.0, 136.4, 135.8, 135.5, 134.2, 134.0, 133.1, 131.0, 129.4, 128.9, 128.6, 128.4, 124.4, 122.3, 114.7, 79.9, 76.3, 70.5, 21.6, 21.3, 21.2. HRMS  $m/z$  (ESI $^+$ ): Calculated for  $\text{C}_{27}\text{H}_{27}\text{N}_2\text{O}_6\text{S}_2$  ( $[\text{M}+\text{H}]^+$ ) 539.1305, found 539.1307.

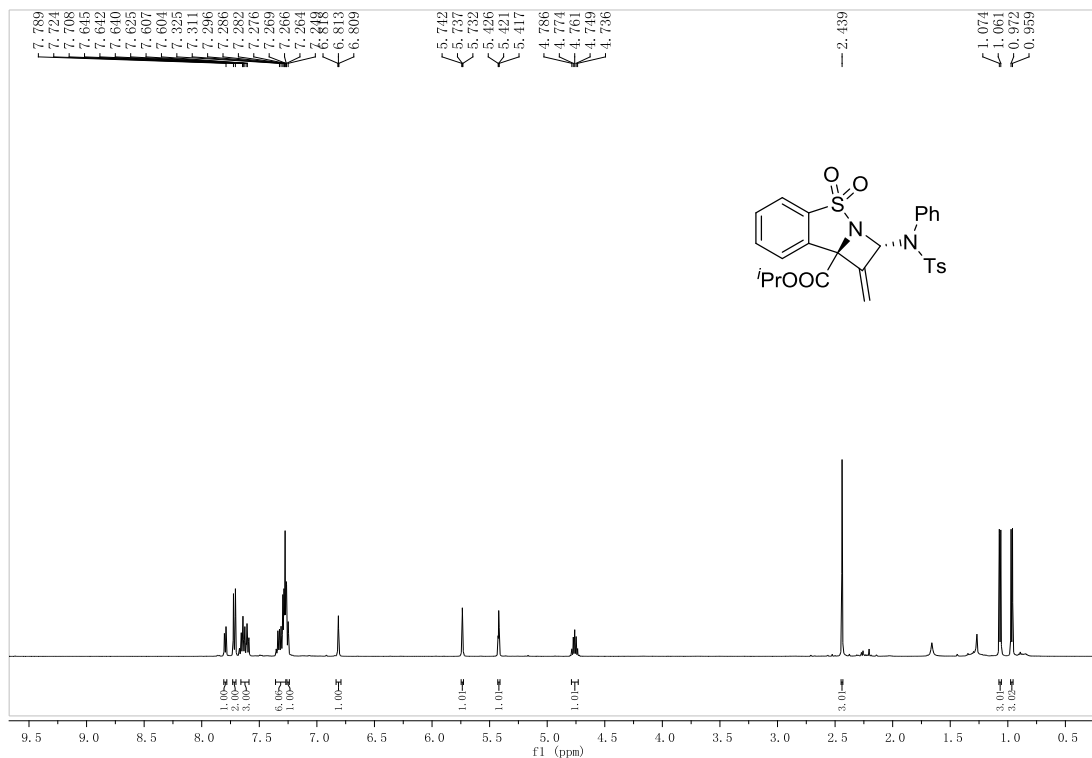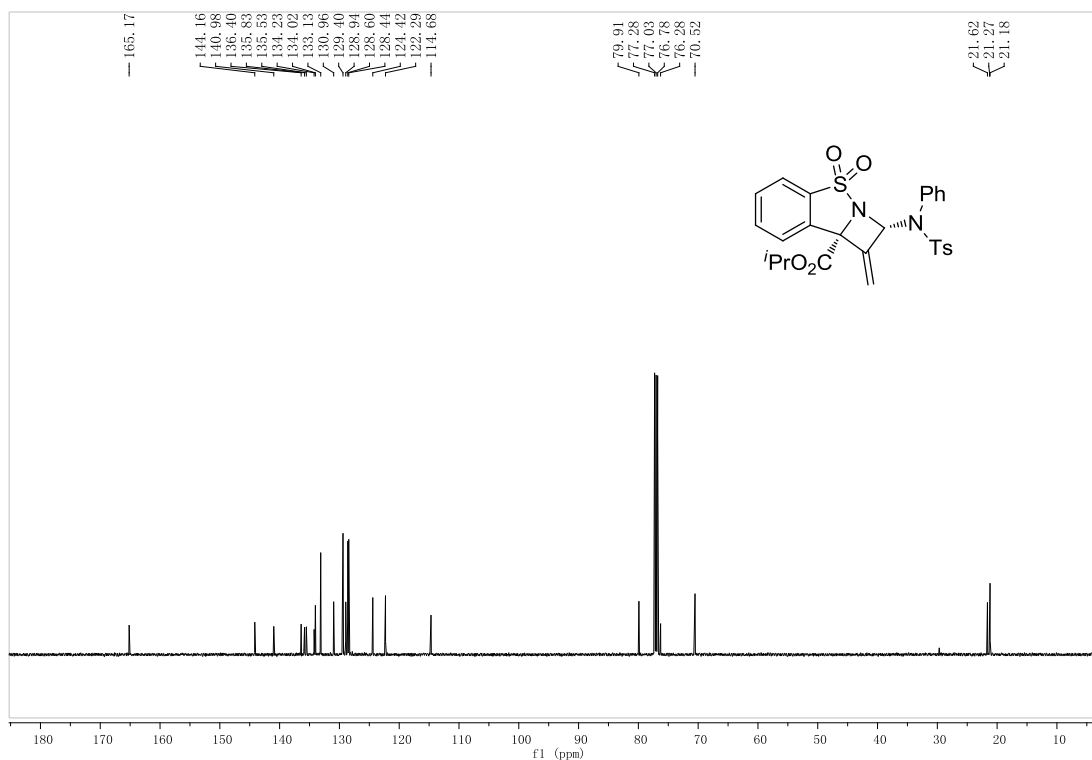

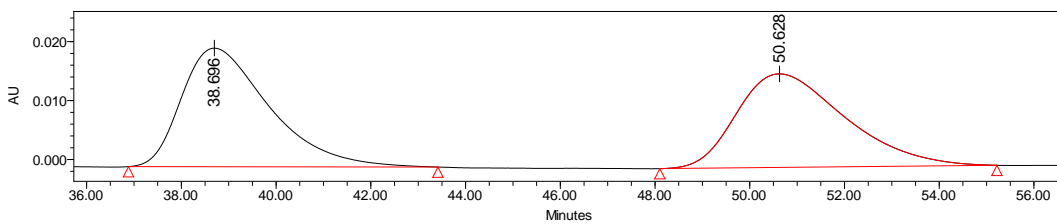

|   | Retention Time | Area    | % Area | Height | % Height |
|---|----------------|---------|--------|--------|----------|
| 1 | 38.696         | 2583609 | 50.61  | 20117  | 55.89    |
| 2 | 50.628         | 2521661 | 49.39  | 15874  | 44.11    |

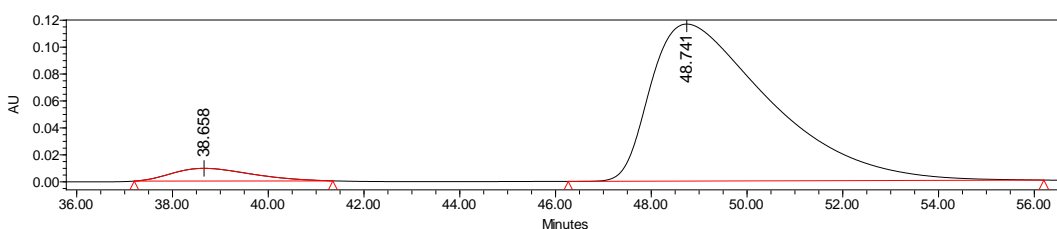

|   | Retention Time | Area     | % Area | Height | % Height |
|---|----------------|----------|--------|--------|----------|
| 1 | 38.658         | 1086166  | 5.12   | 9424   | 7.48     |
| 2 | 48.741         | 20124328 | 94.88  | 116576 | 92.52    |

*Rac+Opt*

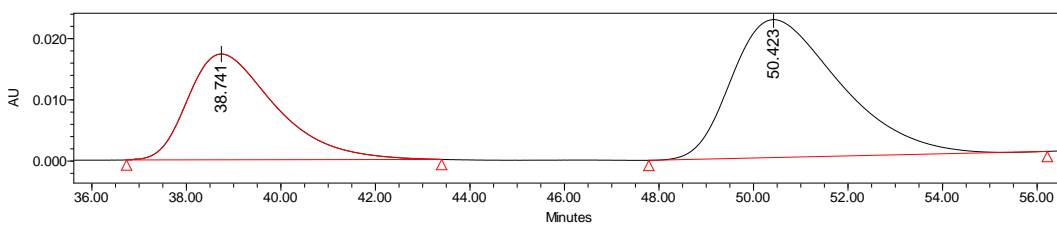

|   | Retention Time | Area    | % Area | Height | % Height |
|---|----------------|---------|--------|--------|----------|
| 1 | 38.741         | 2221390 | 38.23  | 17281  | 43.39    |
| 2 | 50.423         | 3588826 | 61.77  | 22542  | 56.61    |

Methyl 2-((4-methyl-N-phenylphenyl)sulfonamido)-1-methylene-1,2-dihydro-8bH-azeto[1,2-b]benzo[d]isothiazole-8b-carboxylate 4,4-dioxide (**3ac**)

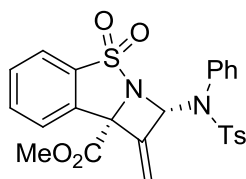

Reaction time: 4 hours. Purified by chromatography on silica gel, eluting with ethyl acetate/petroleum ether 1:3 (v/v), Rf: 0.3; light yellow solid, 76% yield, m.p. 152-154 °C,  $[\alpha]_D^{15} = -6.4$  (c = 1.0 in  $\text{CH}_2\text{Cl}_2$ ), 99% ee [Daicel Chiralcel AD-H column (25 cm  $\times$  0.46 cm ID), n-hexane/i-PrOH = 80/20, 0.8 mL/min, 254 nm;  $t_{\text{major}} = 36.0$  min,  $t_{\text{minor}} = 30.3$  min];  $^1\text{H}$  NMR (500 MHz,  $\text{CDCl}_3$ ):  $\delta$  7.79 (d,  $J = 7.5$  Hz, 1H), 7.72 (d,  $J = 8.5$  Hz, 2H), 7.60-7.67 (m, 3H), 7.33-7.37 (m, 1H), 7.30 (d,  $J = 8.0$  Hz, 3H), 7.23-7.26 (m, 3H), 6.86 (t,  $J = 2.0$  Hz, 1H), 5.75 (t,  $J = 2.5$  Hz, 1H), 5.42 (t,  $J = 2.0$  Hz, 1H), 3.46 (s, 3H), 2.43 (s, 3H).  $^{13}\text{C}$  NMR (125 MHz,  $\text{CDCl}_3$ ):  $\delta$  166.8, 144.2, 140.6, 135.9, 135.6, 135.5, 134.2, 134.1, 133.1, 131.1, 129.4, 129.0, 128.4, 128.3, 124.5, 122.2, 115.3, 80.2, 76.0, 53.2, 21.6. HRMS m/z (ESI<sup>+</sup>): Calculated for  $\text{C}_{25}\text{H}_{23}\text{N}_2\text{O}_6\text{S}_2$  ( $[\text{M}+\text{H}]^+$ ) 511.0992, found 511.0997.

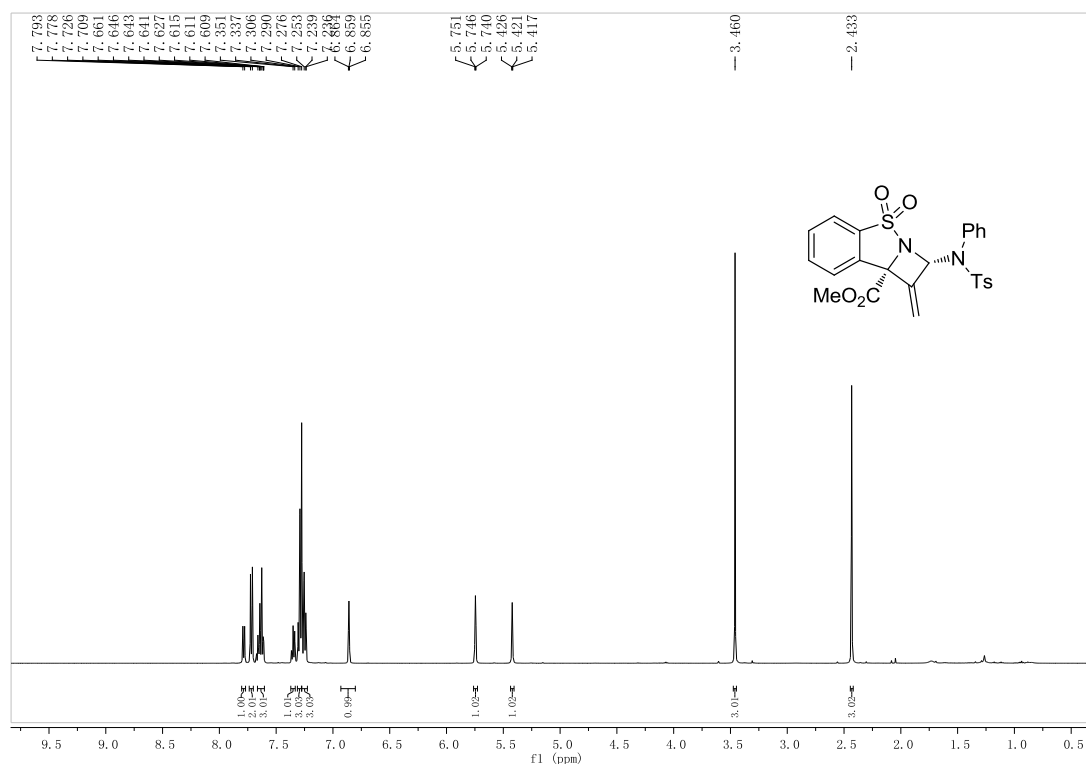

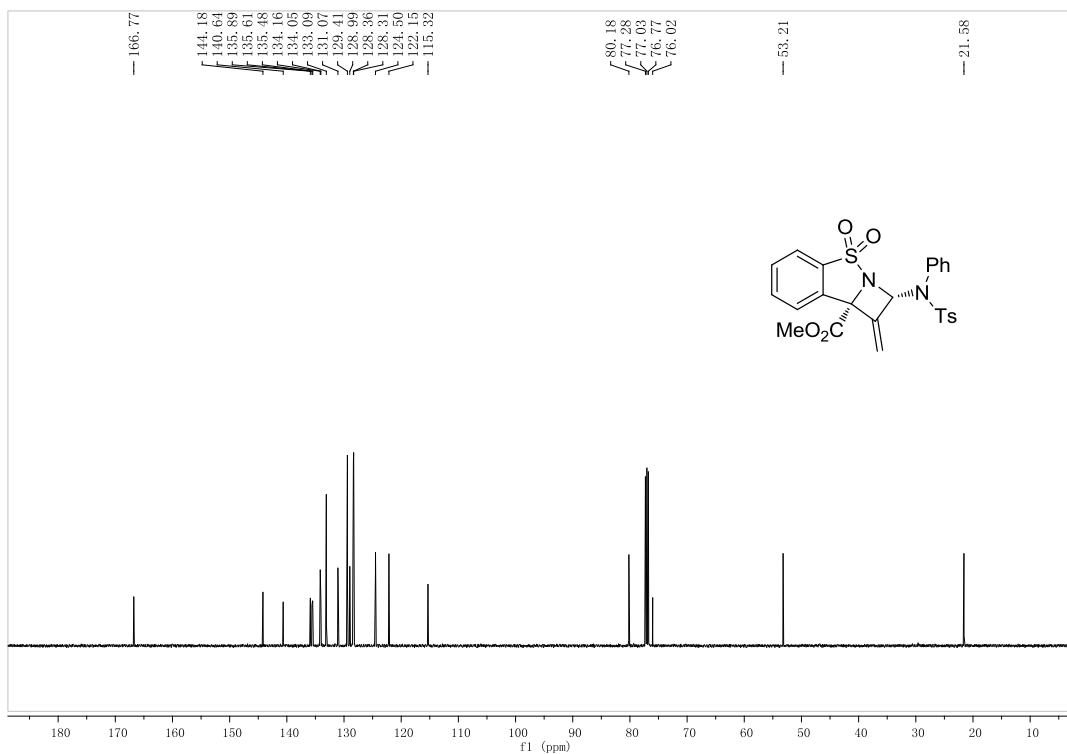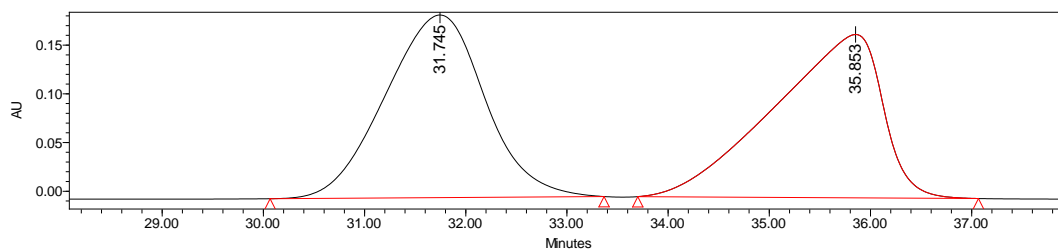

|   | Retention Time | Area     | % Area | Height | % Height |
|---|----------------|----------|--------|--------|----------|
| 1 | 31.745         | 12785385 | 50.59  | 187104 | 52.75    |
| 2 | 35.853         | 12487678 | 49.41  | 167584 | 47.25    |

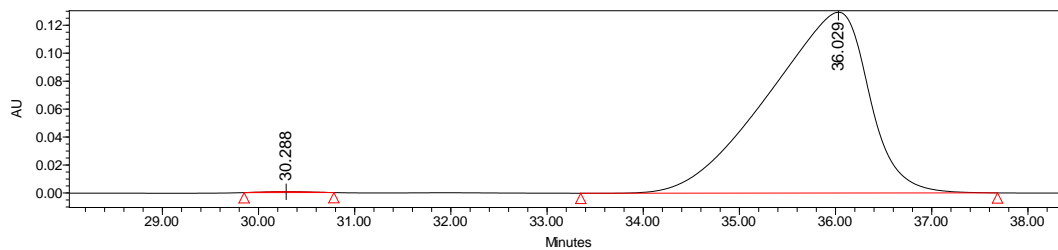

|   | Retention Time | Area    | % Area | Height | % Height |
|---|----------------|---------|--------|--------|----------|
| 1 | 30.288         | 21986   | 0.23   | 655    | 0.50     |
| 2 | 36.029         | 9434230 | 99.77  | 129358 | 99.50    |



Butyl 2-((4-methyl-N-phenylphenyl)sulfonamido)-1-methylene-1,2-dihydro-8bH-azeto[1,2-b]benzo[d]isothiazole-8b-carboxylate 4,4-dioxide (**3ad**)

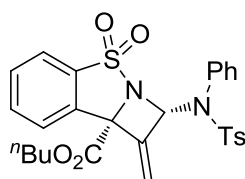

Reaction time: 4 hours. Purified by chromatography on silica gel, eluting with ethyl acetate/petroleum ether 1:3 (v/v), Rf: 0.4; colourless oil, 80% yield,  $[\alpha]_D^{15} = -5.8$  ( $c = 1.0$  in  $\text{CH}_2\text{Cl}_2$ ), 98% ee [Lux 5u Cellulose-2 column (25 cm  $\times$  0.46 cm ID), n-hexane/*i*-PrOH = 80/20, 0.7 mL/min, 254 nm;  $t_{\text{major}} = 46.1$  min,  $t_{\text{minor}} = 38.2$  min];  $^1\text{H}$  NMR (500 MHz,  $\text{CDCl}_3$ ):  $\delta$  7.79 (dd,  $J = 7.5, 1.5$  Hz, 1H), 7.71 (d,  $J = 8.5$  Hz, 2H), 7.58-7.66 (m, 3H), 7.32-7.35 (m, 1H), 7.28-7.30 (m, 2H), 7.23-7.28 (m, 4H), 6.82 (t,  $J = 2.0$  Hz, 1H), 5.74 (t,  $J = 2.5$  Hz, 1H), 5.42 (t,  $J = 2.0$  Hz, 1H), 3.94 (dt,  $J = 10.5, 7.0$  Hz, 1H), 3.82 (dt,  $J = 10.5, 7.0$  Hz, 1H), 2.43 (s, 3H), 1.35-1.41 (m, 2H), 1.11-1.17 (m, 2H), 0.81 (t,  $J = 7.0$  Hz, 3H).  $^{13}\text{C}$  NMR (125 MHz,  $\text{CDCl}_3$ ):  $\delta$  165.9, 144.1, 140.8, 136.2, 135.7, 135.5, 134.2, 134.1, 133.0, 131.0, 129.4, 128.9, 128.5, 128.4, 124.4, 122.2, 114.9, 80.0, 76.2, 66.2, 30.2, 21.6, 18.6, 13.5. HRMS  $m/z$  (ESI $^+$ ): Calculated for  $\text{C}_{28}\text{H}_{29}\text{N}_2\text{O}_6\text{S}_2$  ( $[\text{M}+\text{H}]^+$ ) 553.1462, found 553.1476.

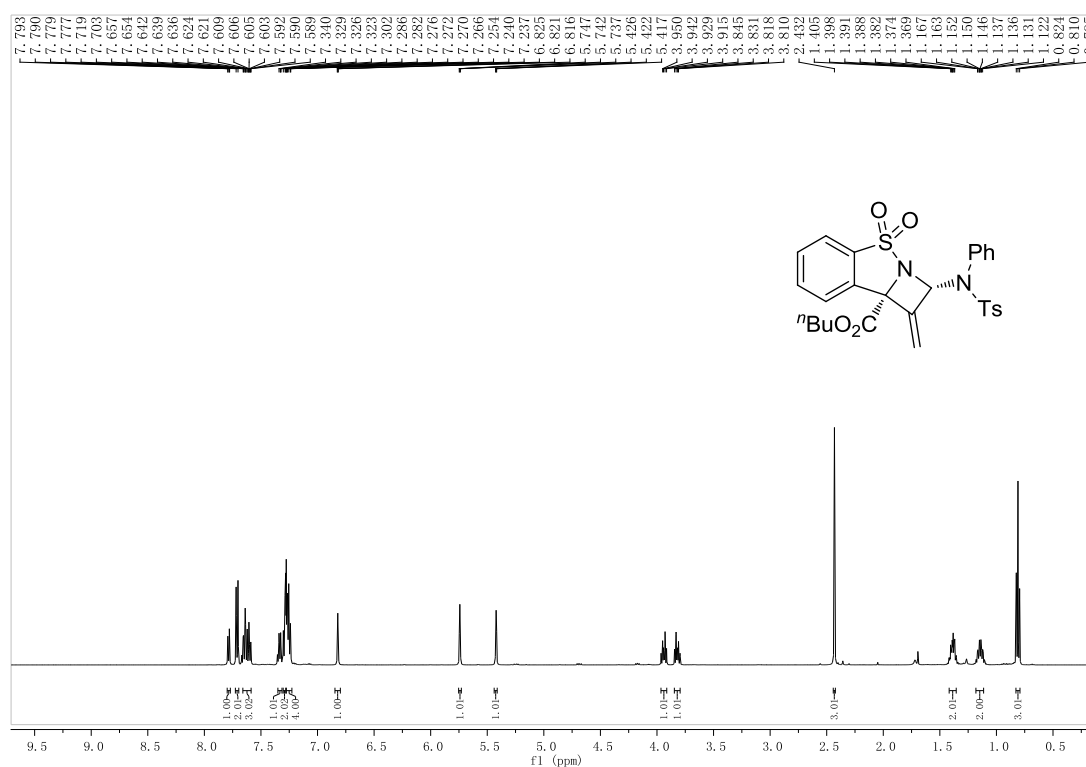

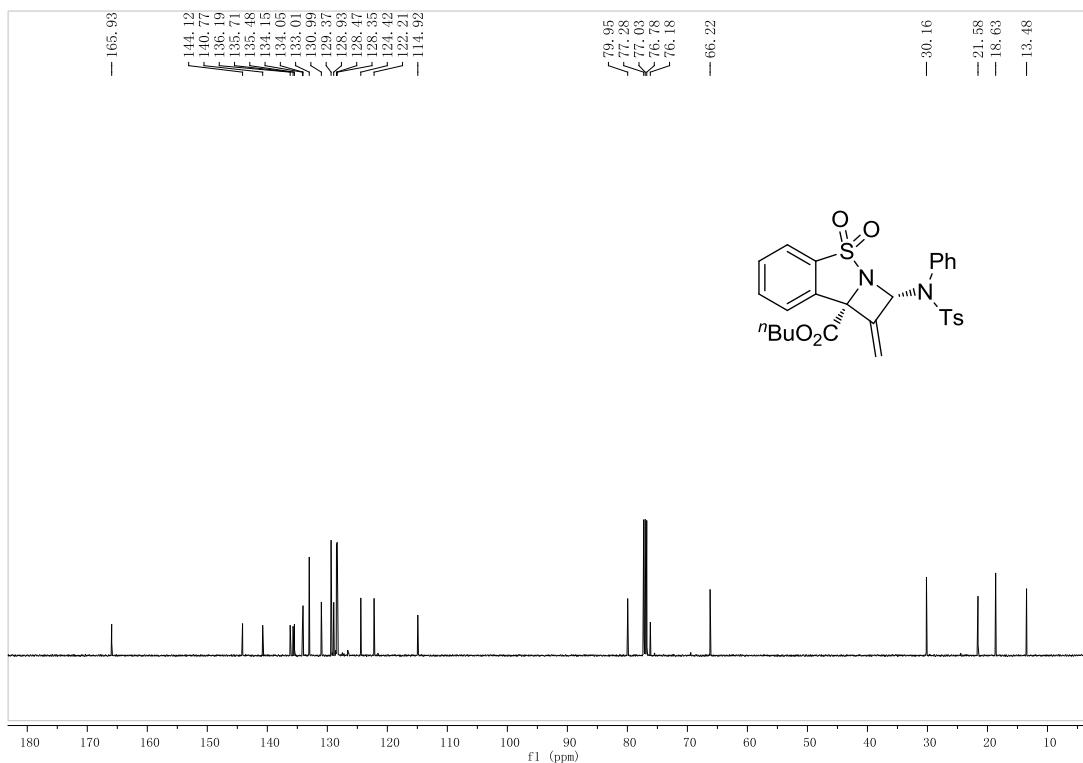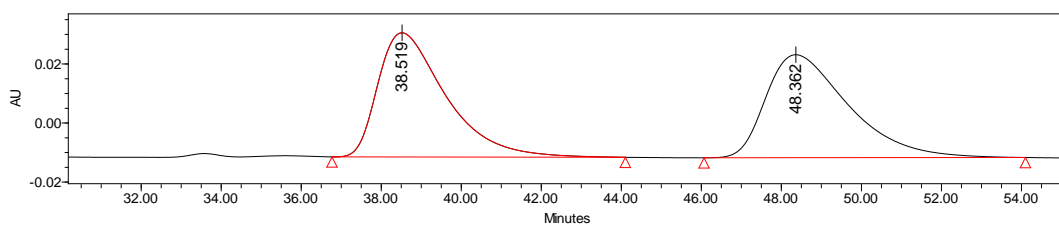

|   | Retention Time | Area    | % Area | Height | % Height |
|---|----------------|---------|--------|--------|----------|
| 1 | 38.519         | 4940476 | 49.72  | 42044  | 54.66    |
| 2 | 48.362         | 4995429 | 50.28  | 34875  | 45.34    |

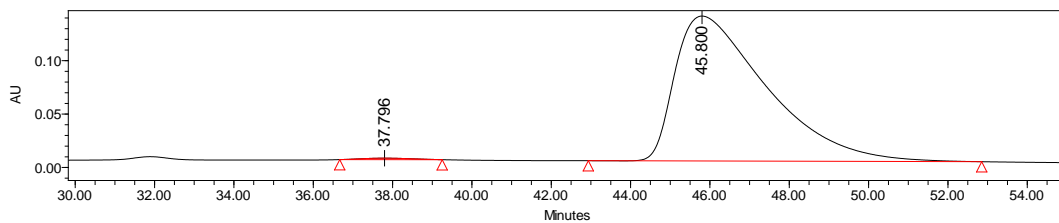

|   | Retention Time | Area     | % Area | Height | % Height |
|---|----------------|----------|--------|--------|----------|
| 1 | 37.796         | 122100   | 0.56   | 1372   | 1.00     |
| 2 | 45.800         | 21780252 | 99.44  | 135733 | 99.00    |

*Rac+Opt*

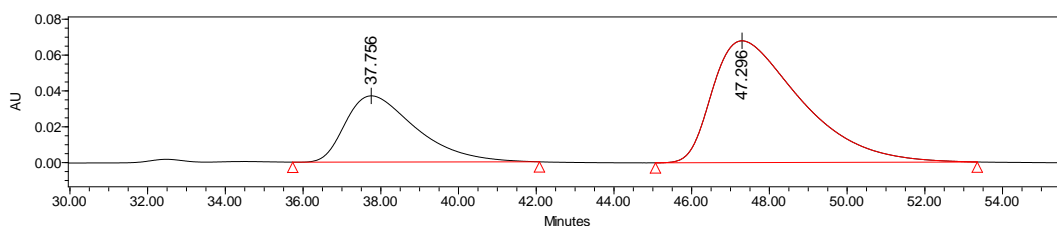

|   | Retention Time | Area     | % Area | Height | % Height |
|---|----------------|----------|--------|--------|----------|
| 1 | 37.756         | 4665690  | 30.29  | 36931  | 35.21    |
| 2 | 47.296         | 10740216 | 69.71  | 67946  | 64.79    |

Ethyl 7-methoxy-2-((4-methyl-N-phenylphenyl)sulfonamido)-1-methylene-1,2-dihydro-8bH-azeto[1,2-b]benzo[d]isothiazole-8b-carboxylate 4,4-dioxide (**3ae**)

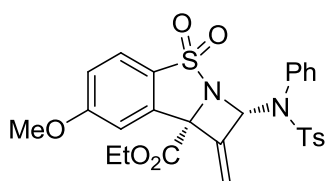

Reaction time: 3 hours. Purified by chromatography on silica gel, eluting with ethyl acetate/petroleum ether 1:3 (v/v), Rf: 0.2; colourless oil, 77% yield,  $[\alpha]_D^{15} = -7.4$  ( $c = 1.0$  in  $\text{CH}_2\text{Cl}_2$ ), 99% ee [Lux 5u Cellulose-2 column (25 cm  $\times$  0.46 cm ID), n-hexane/i-PrOH = 70/30, 0.5 mL/min, 254 nm;  $t_{\text{major}} = 67.5$  min,  $t_{\text{minor}} = 40.5$  min];  $^1\text{H}$  NMR (500 MHz,  $\text{CDCl}_3$ ):  $\delta$  7.71 (d,  $J = 8.5$  Hz, 2H), 7.66 (d,  $J = 8.5$  Hz, 1H), 7.31-7.35 (m, 1H), 7.27-7.30 (m, 3H), 7.22-7.26 (m, 3H), 7.10 (dd,  $J = 8.5, 2.5$  Hz, 1H), 6.99 (d,  $J = 2.5$  Hz, 1H), 6.82 (t,  $J = 2.5$  Hz, 1H), 5.74 (t,  $J = 2.5$  Hz, 1H), 5.42 (t,  $J = 2.0$  Hz, 1H), 3.88-3.96 (m, 2H), 3.85 (s, 3H), 2.42 (s, 3H), 1.03 (t,  $J = 7.5$  Hz, 3H).  $^{13}\text{C}$  NMR (125 MHz,  $\text{CDCl}_3$ ):  $\delta$  166.1, 164.3, 144.1, 140.9, 138.7, 135.5, 134.2, 133.1, 129.3, 128.9, 128.4, 128.3, 127.7, 123.5, 117.9, 114.8, 108.2, 80.0, 75.6, 62.4, 56.0, 21.6, 13.7. HRMS  $m/z$  (ESI<sup>+</sup>): Calculated for  $\text{C}_{27}\text{H}_{27}\text{N}_2\text{O}_7\text{S}_2$  ( $[\text{M}+\text{H}]^+$ ) 555.1254, found 555.1249.

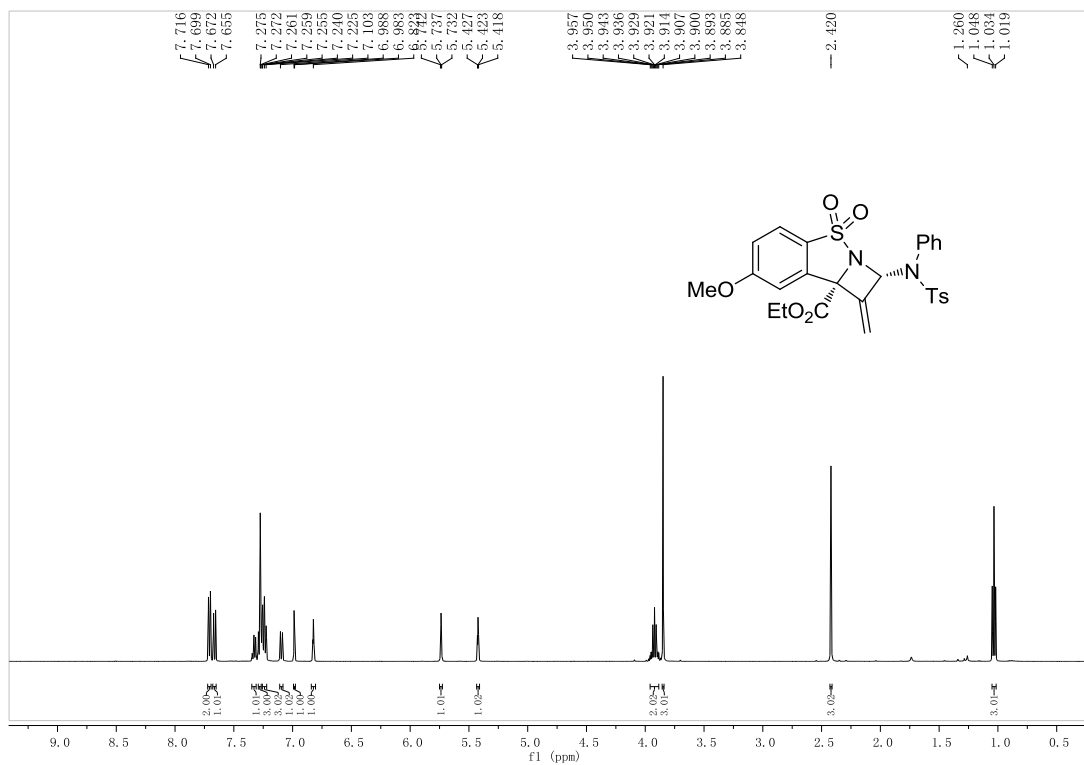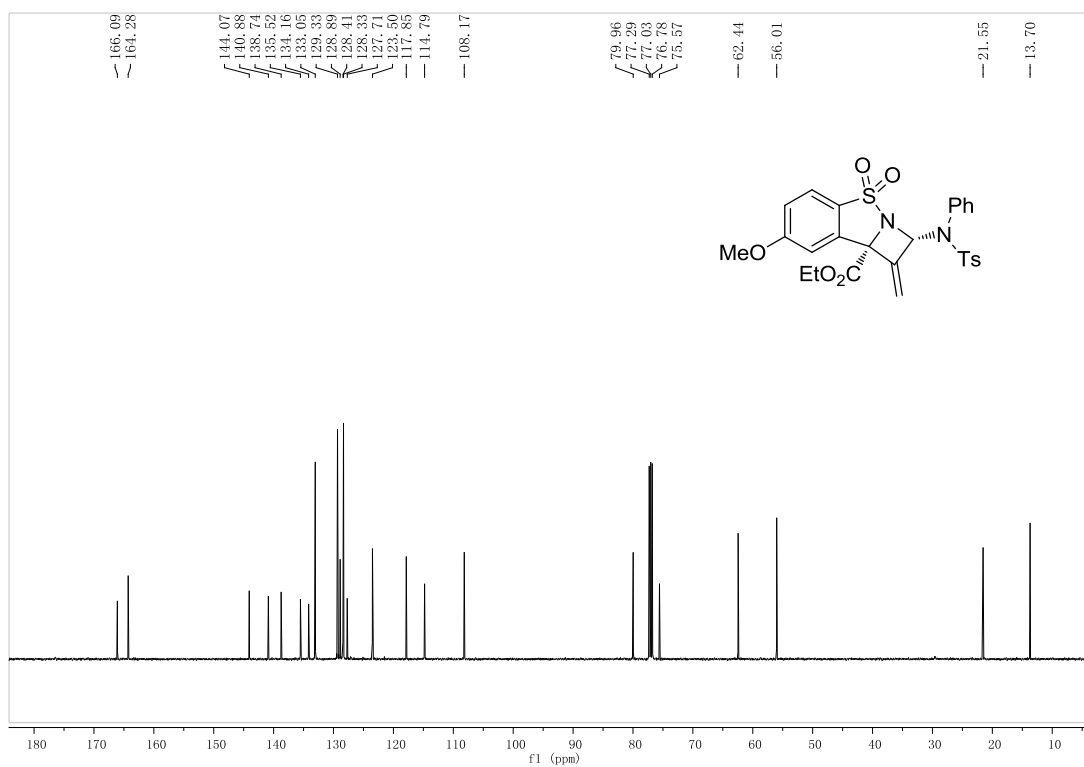

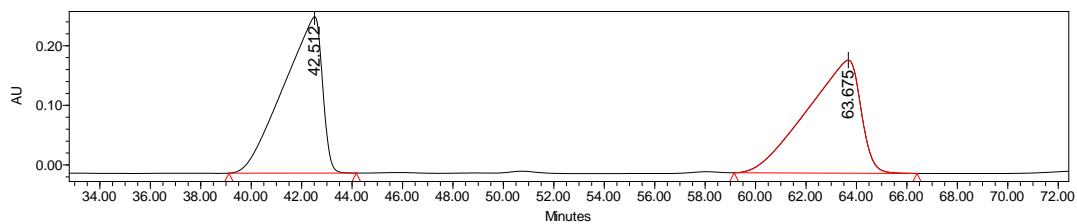

|   | Retention Time | Area     | % Area | Height | % Height |
|---|----------------|----------|--------|--------|----------|
| 1 | 42.512         | 28046048 | 49.84  | 262358 | 58.06    |
| 2 | 63.675         | 28223684 | 50.16  | 189537 | 41.94    |

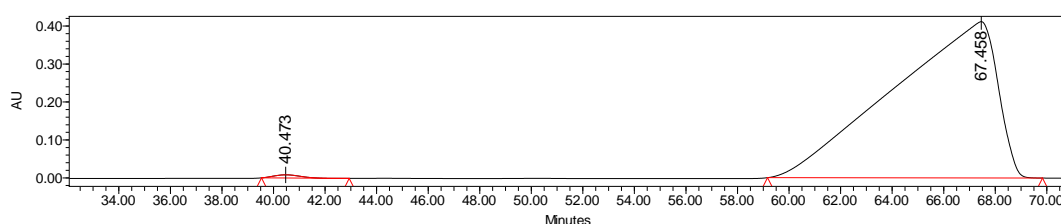

|   | Retention Time | Area      | % Area | Height | % Height |
|---|----------------|-----------|--------|--------|----------|
| 1 | 40.473         | 549558    | 0.47   | 8142   | 1.94     |
| 2 | 67.458         | 116200465 | 99.53  | 411839 | 98.06    |

Ethyl 7-methyl-2-((4-methyl-N-phenylphenyl)sulfonamido)-1-methylene-1,2-dihydro-8bH-azeto[1,2-b]benzo[d]isothiazole-8b-carboxylate 4,4-dioxide (**3af**)

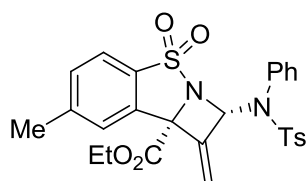

Reaction time: 4 hours. Purified by chromatography on silica gel, eluting with ethyl acetate/petroleum ether 1:3 (v/v), Rf: 0.3; colourless oil, 73% yield,  $[\alpha]_D^{15} = -3.2$  (c = 1.0 in  $\text{CH}_2\text{Cl}_2$ ), 97% ee [Daicel Chiralcel AD-H column (25 cm  $\times$  0.46 cm ID), n-hexane/*i*-PrOH = 80/20, 0.8 mL/min, 254 nm;  $t_{\text{major}} = 43.8$  min,  $t_{\text{minor}} = 36.0$  min];  $^1\text{H}$  NMR (500 MHz,  $\text{CDCl}_3$ )  $\delta$  7.71 (d,  $J = 8.0$  Hz, 2H), 7.65 (d,  $J = 8.0$  Hz, 1H), 7.41 (d,  $J = 8.5$  Hz, 1H), 7.37 (s, 1H), 7.31-7.35 (m, 1H), 7.27-7.30 (m, 3H), 7.27-7.30 (m, 3H), 6.82 (t,  $J = 2.5$  Hz, 1H), 5.75 (t,  $J = 2.5$  Hz, 1H), 5.42 (t,  $J = 2.5$  Hz, 1H), 3.88-

3.97 (m, 2H), 2.44 (d,  $J = 8.0$  Hz, 6H), 1.03 (t,  $J = 7.0$  Hz, 3H).  $^{13}\text{C}$  NMR (125 MHz,  $\text{CDCl}_3$ )  $\delta$  166.2, 145.4, 144.1, 140.9, 136.5, 135.5, 134.2, 133.1, 132.0, 129.4, 128.9, 128.4, 128.3, 124.5, 121.9, 114.8, 79.9, 75.9, 62.4, 21.7, 21.6, 13.7. HRMS  $m/z$  (ESI+): Calculated for  $\text{C}_{27}\text{H}_{27}\text{N}_2\text{O}_6\text{S}_2$  ( $[\text{M}+\text{H}]^+$ ) 539.1305, found 539.1304.

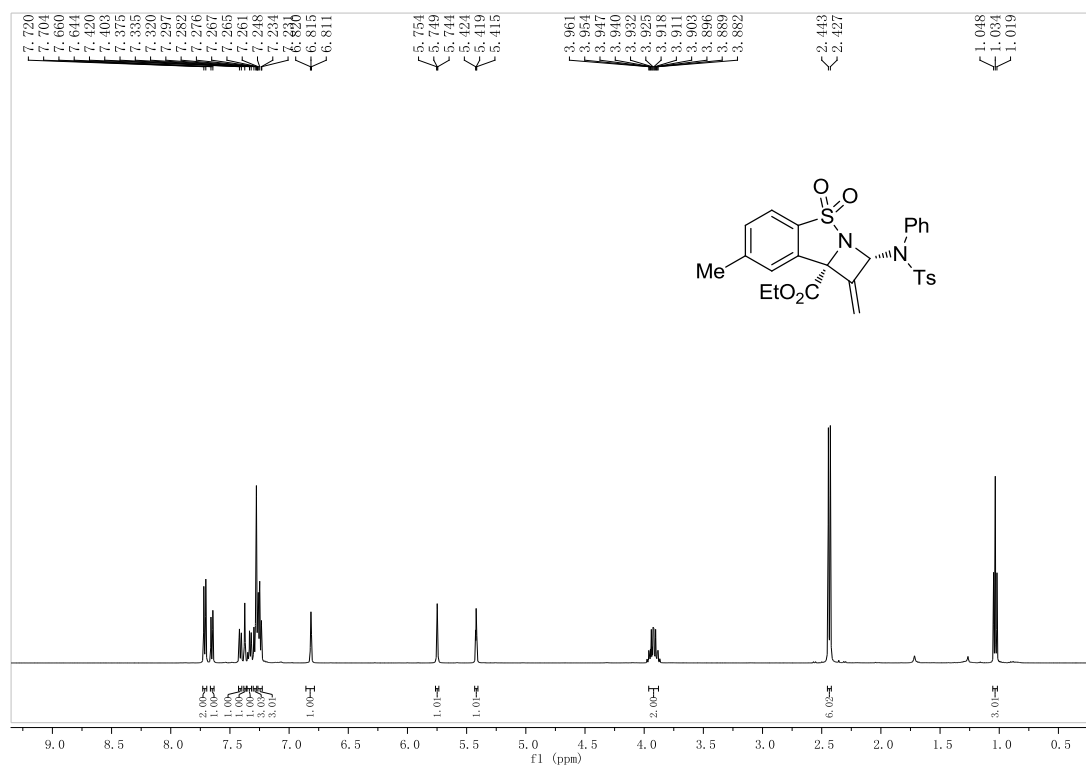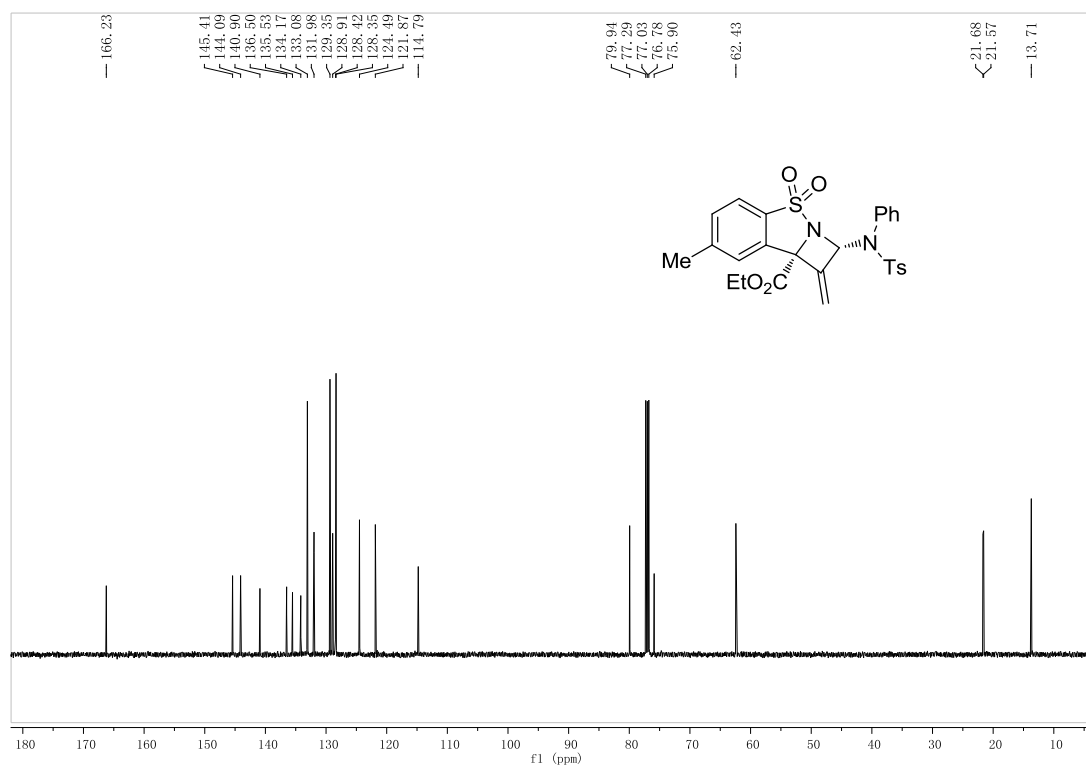

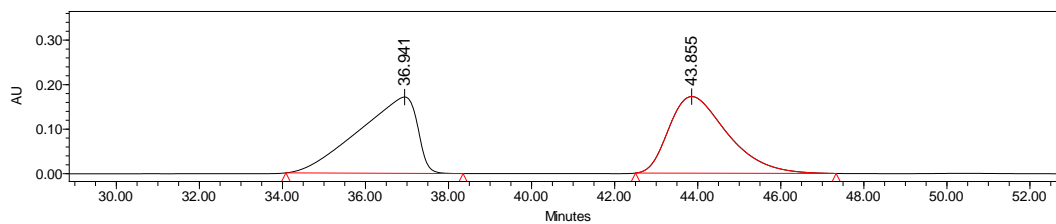

|   | Retention Time | Area     | % Area | Height | % Height |
|---|----------------|----------|--------|--------|----------|
| 1 | 36.941         | 17120808 | 50.13  | 172115 | 49.85    |
| 2 | 43.855         | 17034593 | 49.87  | 173120 | 50.15    |

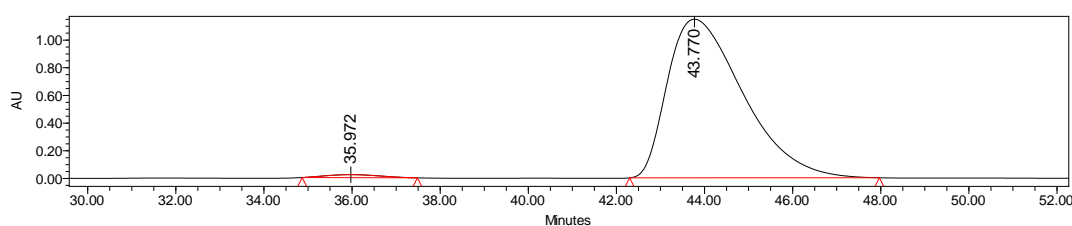

|   | Retention Time | Area      | % Area | Height  | % Height |
|---|----------------|-----------|--------|---------|----------|
| 1 | 35.972         | 1986316   | 1.42   | 22933   | 1.96     |
| 2 | 43.770         | 137587016 | 98.58  | 1149333 | 98.04    |

Ethyl 7-(tert-butyl)-2-((4-methyl-N-phenylphenyl)sulfonamido)-1-methylene-1,2-dihydro-8bH-azeto[1,2-b]benzo[d]isothiazole-8b-carboxylate 4,4-dioxide (**3ag**)

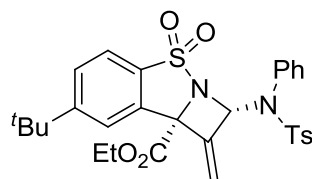

Reaction time: 4 hours. Purified by chromatography on silica gel, eluting with ethyl acetate/petroleum ether 1:3 (v/v), Rf: 0.4; light yellow solid, 70% yield, m.p. 196-198 °C,  $[\alpha]_D^{15} = -0.4$  (c = 1.0 in  $\text{CH}_2\text{Cl}_2$ ), 98% ee [Lux 5uCellulose-2 column (25 cm  $\times$  0.46 cm ID), n-hexane/*i*-PrOH = 80/20, 0.7 mL/min, 254 nm;  $t_{\text{major}} = 38.6$  min,  $t_{\text{minor}} = 50.9$  min];  $^1\text{H}$  NMR (500 MHz,  $\text{CDCl}_3$ ):  $\delta$  7.71 (dd,  $J = 8.0, 4.5$  Hz, 3H), 7.66 (dd,  $J = 8.5, 1.5$  Hz, 1H), 7.56 (d,  $J = 1.5$  Hz, 1H), 7.32-7.36 (m, 1H), 7.27-7.31 (m, 3H), 7.24-7.27 (m, 3H), 6.82 (t,  $J = 2.0$  Hz, 1H), 5.75 (t,  $J = 2.5$  Hz, 1H), 5.42 (t,  $J = 2.5$

Hz, 1H), 3.93 (tt,  $J = 7.0, 3.5$  Hz, 2H), 2.43 (s, 3H), 1.33 (s, 9H), 1.04 (t,  $J = 7.0$  Hz, 3H).  $^{13}\text{C}$  NMR (125 MHz,  $\text{CDCl}_3$ ):  $\delta$  166.2, 158.7, 144.1, 141.0, 136.4, 135.5, 134.2, 133.1, 133.0, 129.4, 128.9, 128.7, 128.5, 128.4, 121.7, 120.8, 114.6, 79.9, 76.1, 62.4, 35.5, 31.1, 21.6, 13.7. HRMS  $m/z$  (ESI+): Calculated for  $\text{C}_{30}\text{H}_{33}\text{N}_2\text{O}_6\text{S}_2$  ( $[\text{M}+\text{H}]^+$ ) 581.1775, found 581.1795.

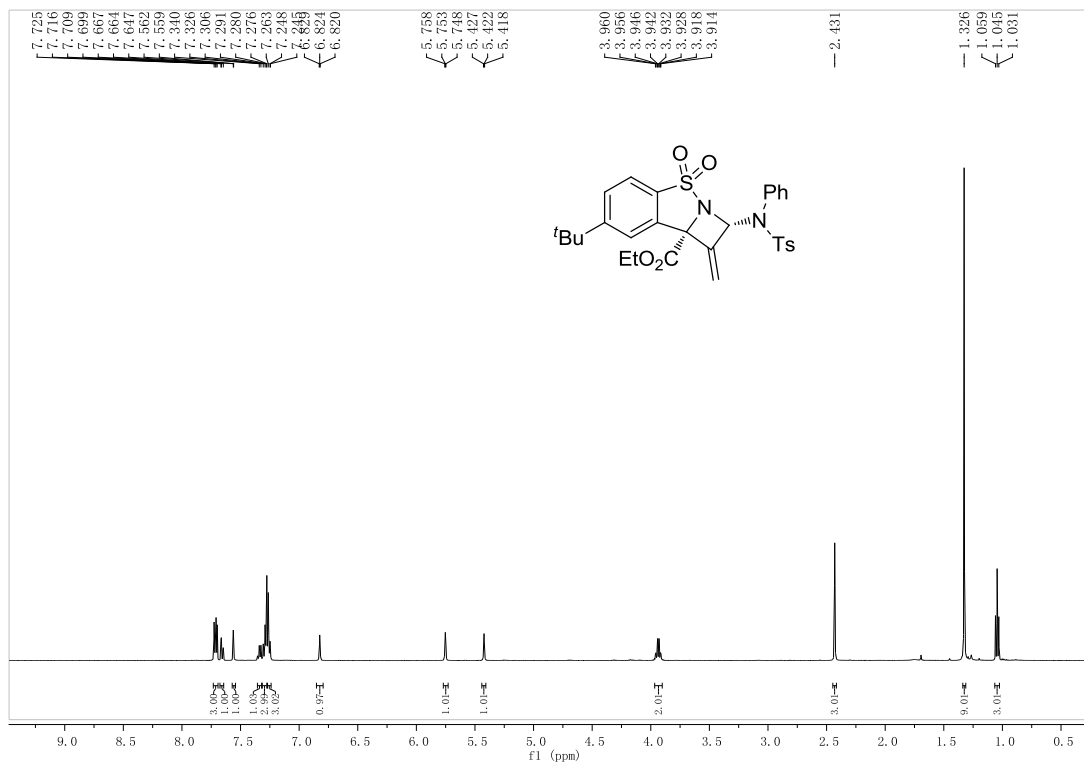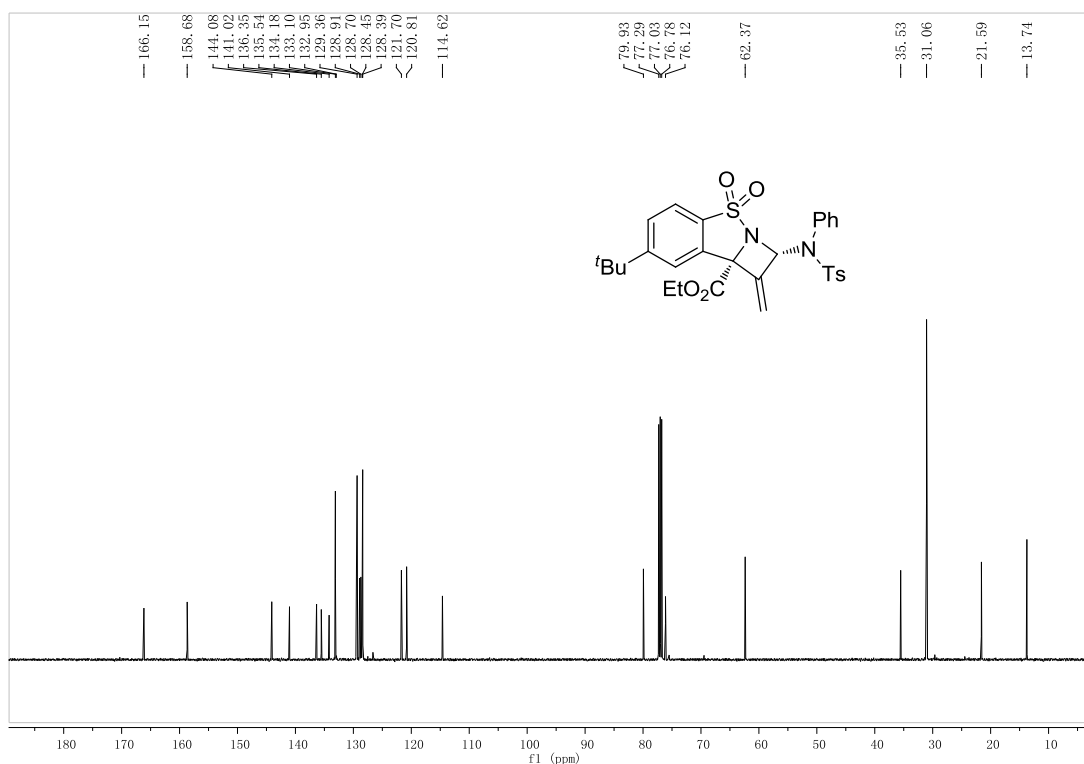



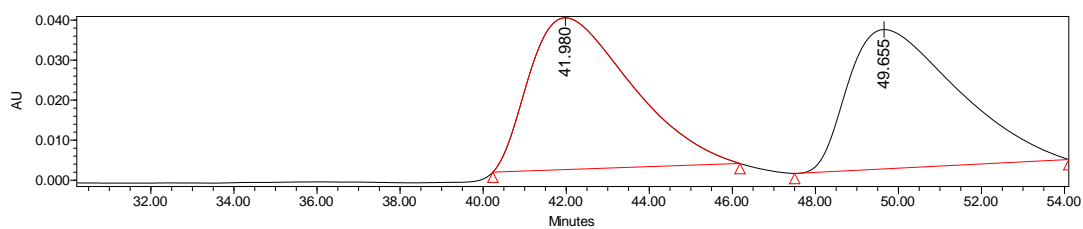

|   | Retention Time | Area    | % Area | Height | % Height |
|---|----------------|---------|--------|--------|----------|
| 1 | 41.980         | 6706196 | 51.87  | 38973  | 53.20    |
| 2 | 49.655         | 6223790 | 48.13  | 34291  | 46.80    |

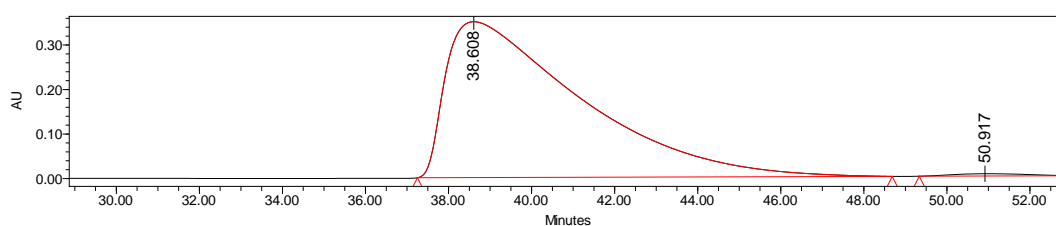

|   | Retention Time | Area     | % Area | Height | % Height |
|---|----------------|----------|--------|--------|----------|
| 1 | 38.608         | 78969089 | 99.19  | 350209 | 98.55    |
| 2 | 50.917         | 645799   | 0.81   | 5150   | 1.45     |

Ethyl 7-chloro-2-((4-methyl-N-phenylphenyl)sulfonamido)-1-methylene-1,2-dihydro-8bH-azeto[1,2-b]benzo[d]isothiazole-8b-carboxylate 4,4-dioxide (**3ah**)

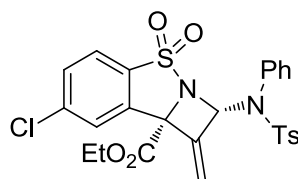

Reaction time: 4 hours. Purified by chromatography on silica gel, eluting with ethyl acetate/petroleum ether 1:3 (v/v), R<sub>f</sub>: 0.5; light yellow solid, 64% yield, m.p. 191-193 °C,  $[\alpha]_D^{15} = -3.5$  (c = 1.0 in CH<sub>2</sub>Cl<sub>2</sub>), 99% ee [Lux 5u Cellulose-2 column (25 cm × 0.46 cm ID), n-hexane/*i*-PrOH = 80/20, 0.7 mL/min, 254 nm;  $t_{\text{major}} = 45.4$  min,  $t_{\text{minor}} = 38.1$  min]; <sup>1</sup>H NMR (500 MHz, CDCl<sub>3</sub>): δ 7.68-7.74 (m, 3H), 7.59 (dd, *J* = 6.0, 2.0 Hz, 2H), 7.34 (d, *J* = 7.5 Hz, 1H), 7.27-7.74 (m, 4H), 7.23 (d, *J* = 7.5 Hz, 2H), 6.84 (t, *J* = 2.0 Hz, 1H), 5.76 (t, *J* = 2.5 Hz, 1H), 5.46 (t, *J* = 2.5 Hz, 1H), 3.90-4.00 (m, 2H),

2.44 (s, 3H), 1.05 (t,  $J = 7.0$  Hz, 3H).  $^{13}\text{C}$  NMR (125 MHz,  $\text{CDCl}_3$ ):  $\delta$  165.6, 144.2, 140.6, 140.3, 138.2, 135.4, 134.3, 134.0, 133.1, 131.6, 129.4, 129.0, 128.5, 128.4, 124.8, 123.4, 115.4, 80.2, 75.4, 62.8, 21.6, 13.7. HRMS  $m/z$  (ESI $^+$ ): Calculated for  $\text{C}_{26}\text{H}_{24}\text{ClN}_2\text{O}_6\text{S}_2$  ( $[\text{M}+\text{H}]^+$ ) 559.0759, found 559.0761.

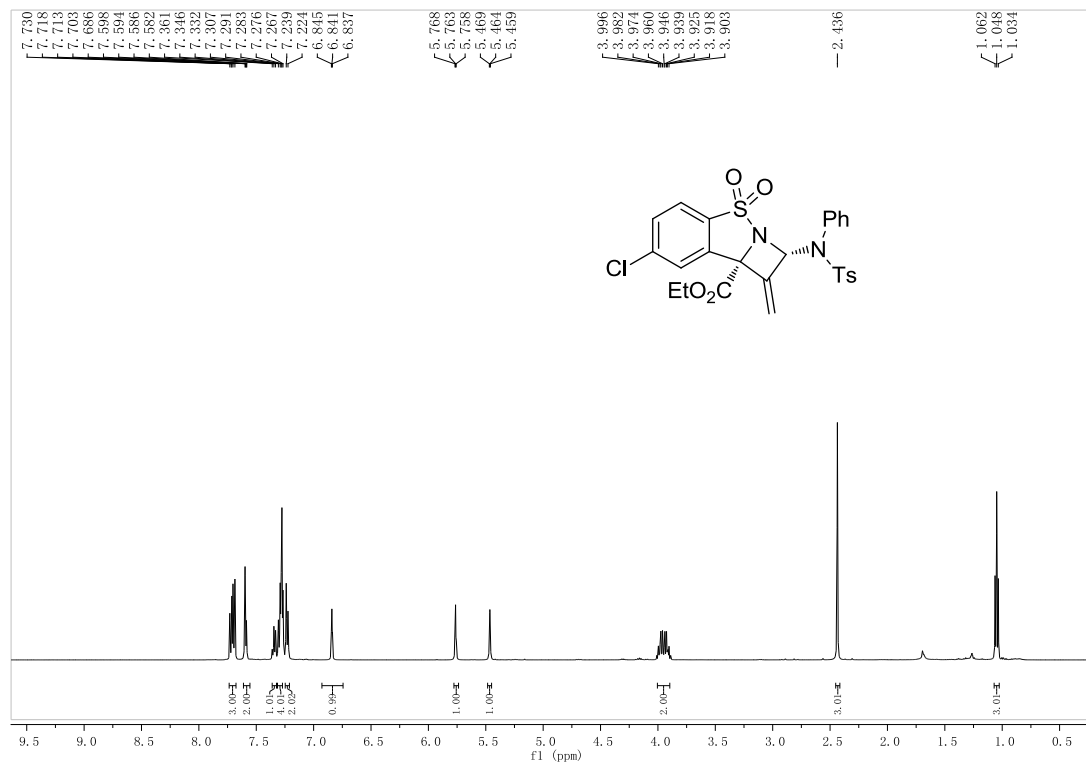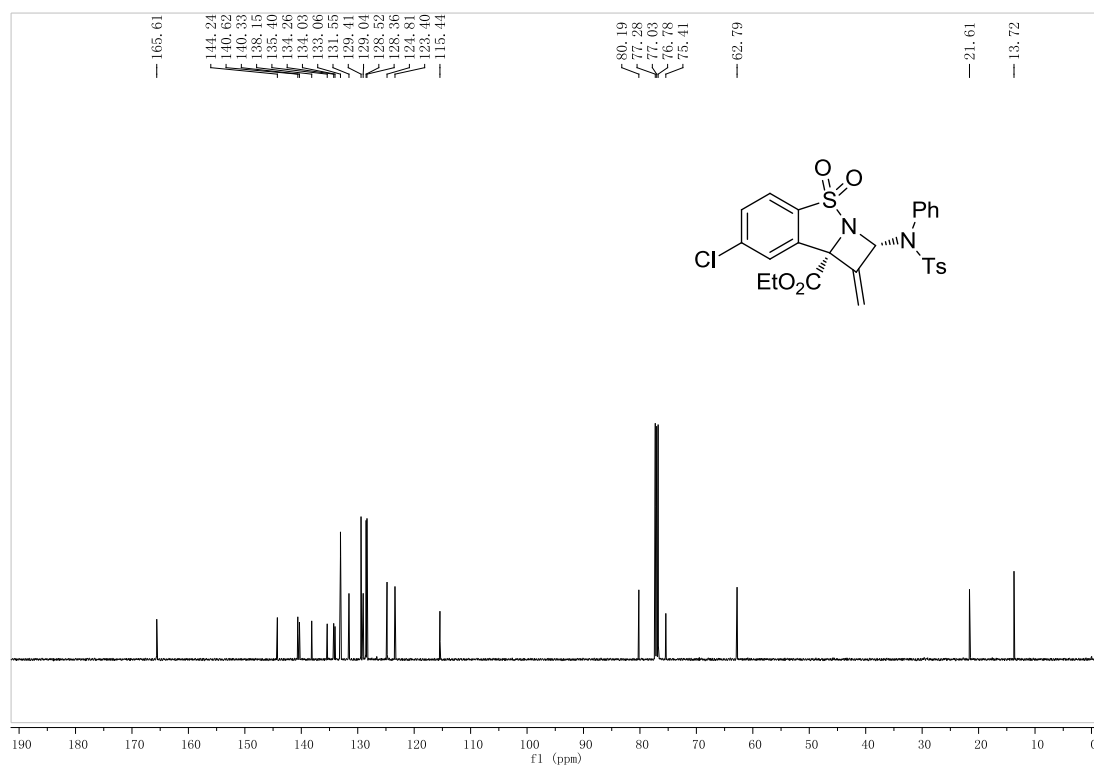

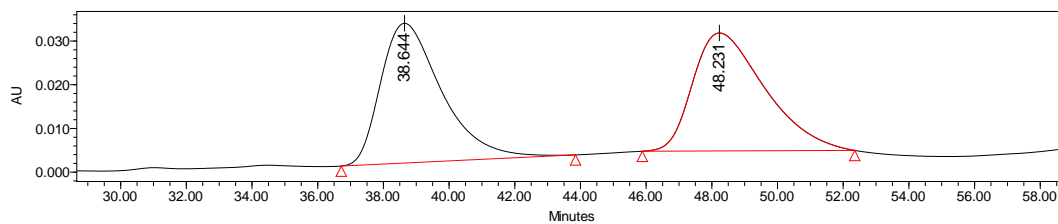

|   | Retention Time | Area    | % Area | Height | % Height |
|---|----------------|---------|--------|--------|----------|
| 1 | 38.644         | 4106360 | 49.29  | 31931  | 54.05    |
| 2 | 48.231         | 4224879 | 50.71  | 27150  | 45.95    |

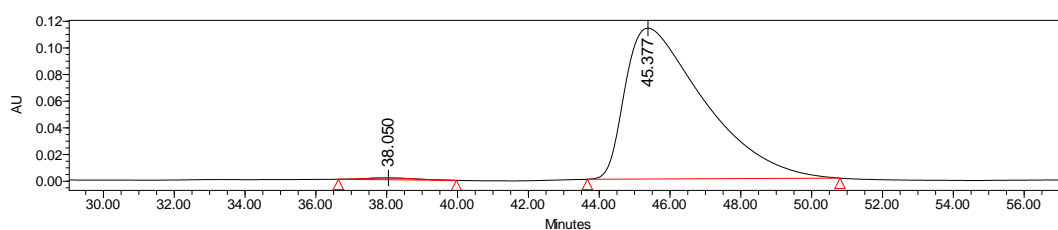

|   | Retention Time | Area     | % Area | Height | % Height |
|---|----------------|----------|--------|--------|----------|
| 1 | 38.050         | 87731    | 0.50   | 1095   | 0.96     |
| 2 | 45.377         | 17546678 | 99.50  | 113192 | 99.04    |

*Rac+Opt*

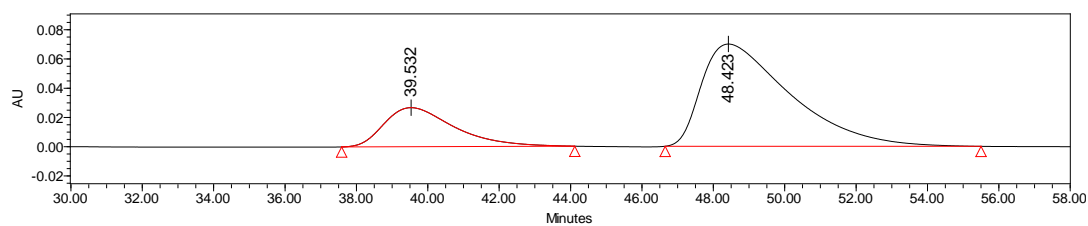

|   | Retention Time | Area     | % Area | Height | % Height |
|---|----------------|----------|--------|--------|----------|
| 1 | 39.532         | 3645527  | 23.23  | 26723  | 27.65    |
| 2 | 48.423         | 12046971 | 76.77  | 69908  | 72.35    |

Ethyl 7-fluoro-2-((4-methyl-N-phenylphenyl)sulfonamido)-1-methylene-1,2-dihydro-8bH-azeto[1,2-b]benzo[d]isothiazole-8b-carboxylate 4,4-dioxide (**3ai**)

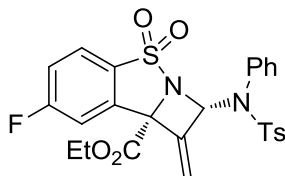

Reaction time: 4 hours. Purified by chromatography on silica gel, eluting with ethyl acetate/petroleum ether 1:3 (v/v), Rf: 0.4; white solid, 70% yield, m.p. 167-169 °C,  $[\alpha]_D^{15} = -4.4$  (c =1.0 in  $\text{CH}_2\text{Cl}_2$ ), 95% ee [Lux 5u Cellulose-2 column (25 cm  $\times$  0.46 cm ID), n-hexane/*i*-PrOH = 80/20, 0.7 mL/min, 254 nm;  $t_{\text{major}} = 47.1$  min,  $t_{\text{minor}} = 39.7$  min];  $^1\text{H}$  NMR (500 MHz,  $\text{CDCl}_3$ ):  $\delta$  7.79 (dd,  $J = 8.5, 4.5$  Hz, 1H), 7.69-7.72 (m, 2H), 7.32-7.37 (m, 2H), 7.27-7.32 (m, 5H), 7.22-7.26 (m, 2H), 6.86 (t,  $J = 2.5$  Hz, 1H), 5.75 (t,  $J = 2.5$  Hz, 1H), 5.47 (t,  $J = 2.5$  Hz, 1H), 3.89-4.00 (m, 2H), 2.44 (s, 3H), 1.05 (t,  $J = 7.0$  Hz, 3H).  $^{13}\text{C}$  NMR (125 MHz,  $\text{CDCl}_3$ ):  $\delta$  165.9 (d,  $J = 255.0$  Hz), 165.6, 144.2, 140.4, 139.3 (d,  $J = 9.4$  Hz), 135.4, 134.0, 133.0, 131.8, 129.4, 129.0, 128.4 (d,  $J = 18.8$  Hz), 126.6, 124.5 (d,  $J = 10.1$  Hz), 119.1 (d,  $J = 23.8$  Hz), 115.3, 111.8 (d,  $J = 25.0$  Hz), 80.2, 75.3, 62.8, 21.6, 13.7. HRMS  $m/z$  (ESI $^+$ ): Calculated for  $\text{C}_{26}\text{H}_{24}\text{FN}_2\text{O}_6\text{S}_2$  ( $[\text{M}+\text{H}]^+$ ) 543.1054, found 543.1077.

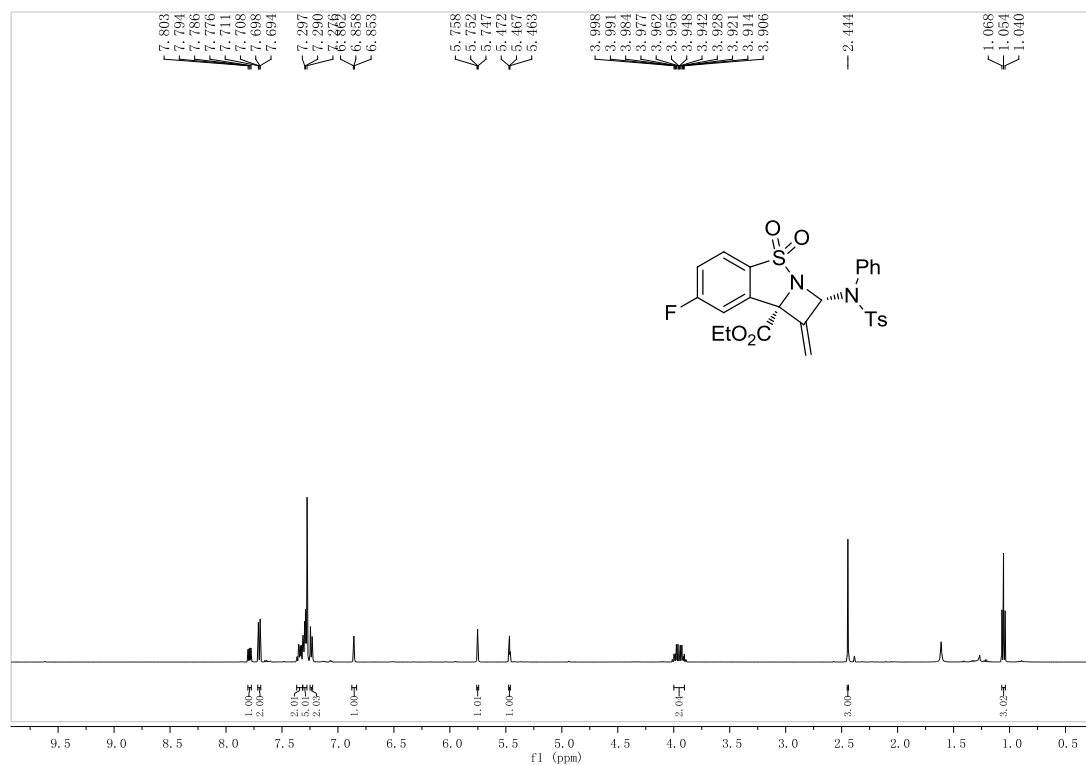

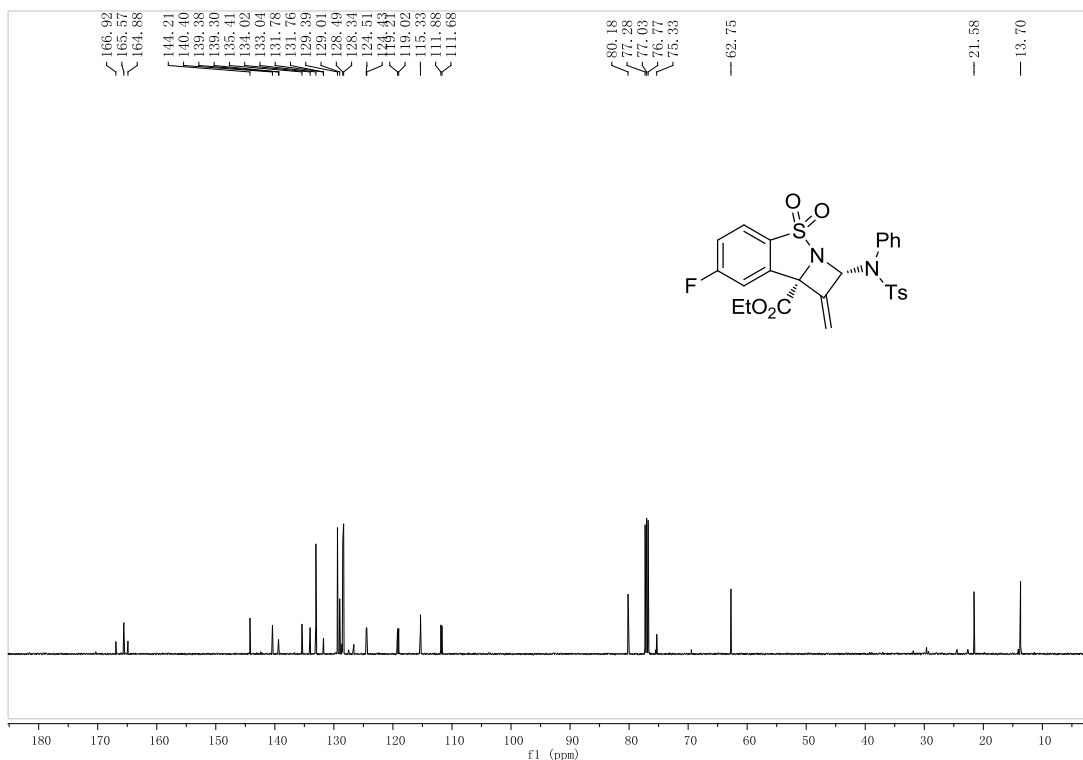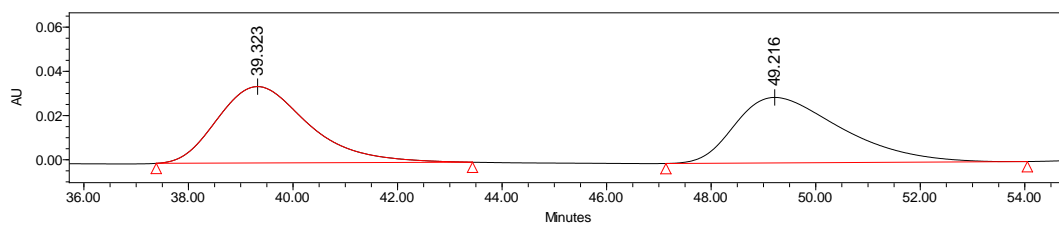

|   | Retention Time | Area    | % Area | Height | % Height |
|---|----------------|---------|--------|--------|----------|
| 1 | 39.323         | 4192642 | 50.03  | 34581  | 53.87    |
| 2 | 49.216         | 4187791 | 49.97  | 29615  | 46.13    |

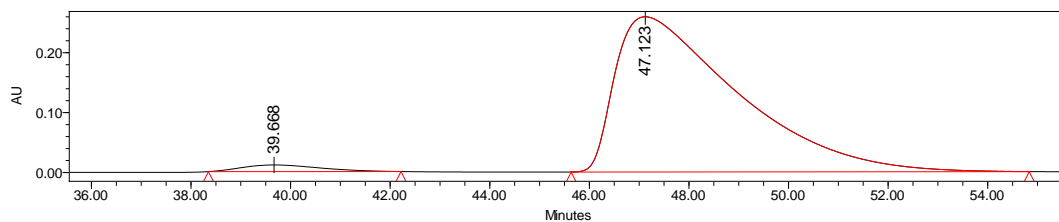

|   | Retention Time | Area     | % Area | Height | % Height |
|---|----------------|----------|--------|--------|----------|
| 1 | 39.668         | 1203582  | 2.65   | 11080  | 4.10     |
| 2 | 47.123         | 44198436 | 97.35  | 259200 | 95.90    |

Ethyl 2-((4-methyl-N-phenylphenyl)sulfonamido)-1-methylene-7-(trifluoromethyl)-1,2-dihydro-8bH-azeto[1,2-b]benzo[d]isothiazole-8b-carboxylate 4,4-dioxide (**3aj**)

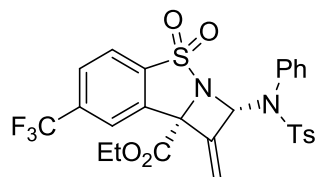

Reaction time: 3 hours. Purified by chromatography on silica gel, eluting with ethyl acetate/petroleum ether 1:3 (v/v), Rf: 0.5; colourless oil, 52% yield,  $[\alpha]_D^{15} = -2.2$  (c = 1.0 in CH<sub>2</sub>Cl<sub>2</sub>), 99% ee [Lux 5uCellulose-2 column (25 cm × 0.46 cm ID), n-hexane/i-PrOH = 90/10, 0.7 mL/min, 254 nm;  $t_{\text{major}} = 72.3$  min,  $t_{\text{minor}} = 62.1$  min]; <sup>1</sup>H NMR (500 MHz, CDCl<sub>3</sub>): δ 7.92 (dd,  $J = 21.0, 10.0$  Hz, 3H), 7.69 (d,  $J = 8.5$  Hz, 2H), 7.34-7.38 (m, 1H), 7.30 (dd,  $J = 15.5, 8.0$  Hz, 4H), 7.23-7.26 (m, 2H), 6.86 (t,  $J = 2.0$  Hz, 1H), 5.80 (t,  $J = 2.5$  Hz, 1H), 5.49 (t,  $J = 2.5$  Hz, 1H), 3.92-4.01 (m, 2H), 2.44 (s, 3H), 1.05 (t,  $J = 7.0$  Hz, 3H). <sup>13</sup>C NMR (125 MHz, CDCl<sub>3</sub>): δ 165.5, 144.3, 140.2, 138.9, 137.3, 136.2 (q,  $J = 33.8$  Hz), 135.4, 134.0, 133.1, 129.5, 129.1, 128.6, 128.4, 123.3, 123.0 (q,  $J = 211.3$  Hz), 122.2, 122.1, 115.7, 80.3, 75.8, 62.9, 29.7, 21.6, 13.7. HRMS m/z (ESI<sup>+</sup>): Calculated for C<sub>27</sub>H<sub>24</sub>F<sub>3</sub>N<sub>2</sub>O<sub>6</sub>S<sub>2</sub> ([M+H]<sup>+</sup>) 593.1022, found 593.1019.

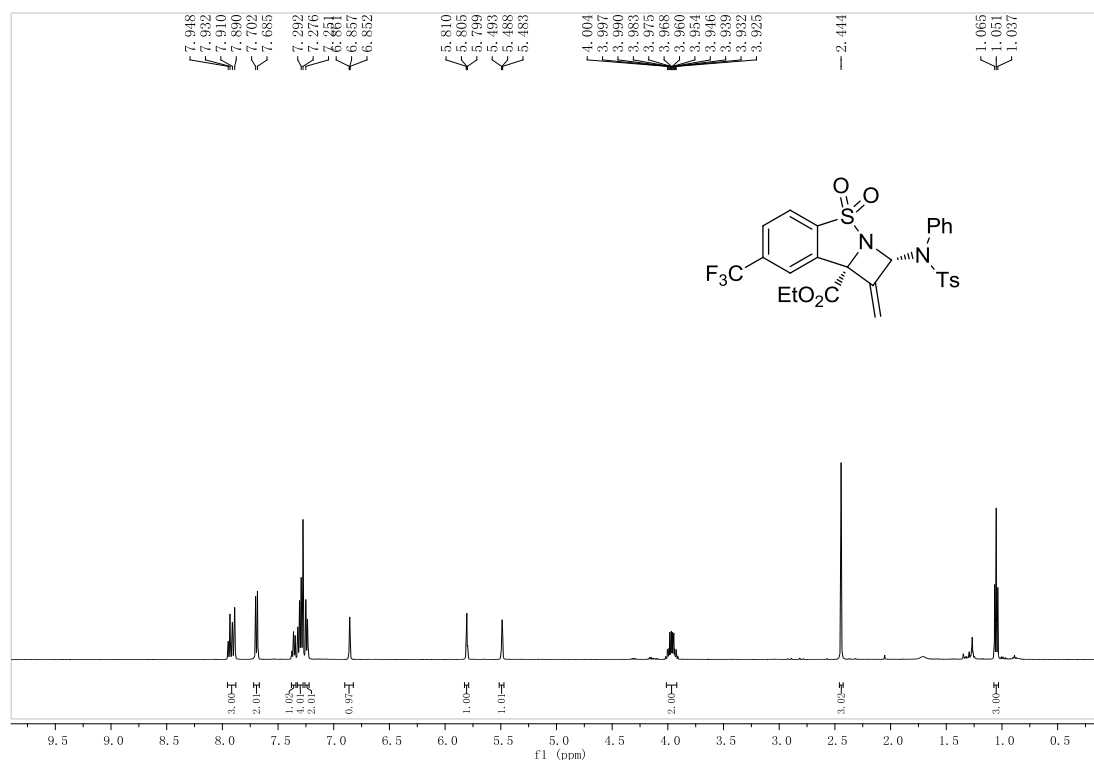

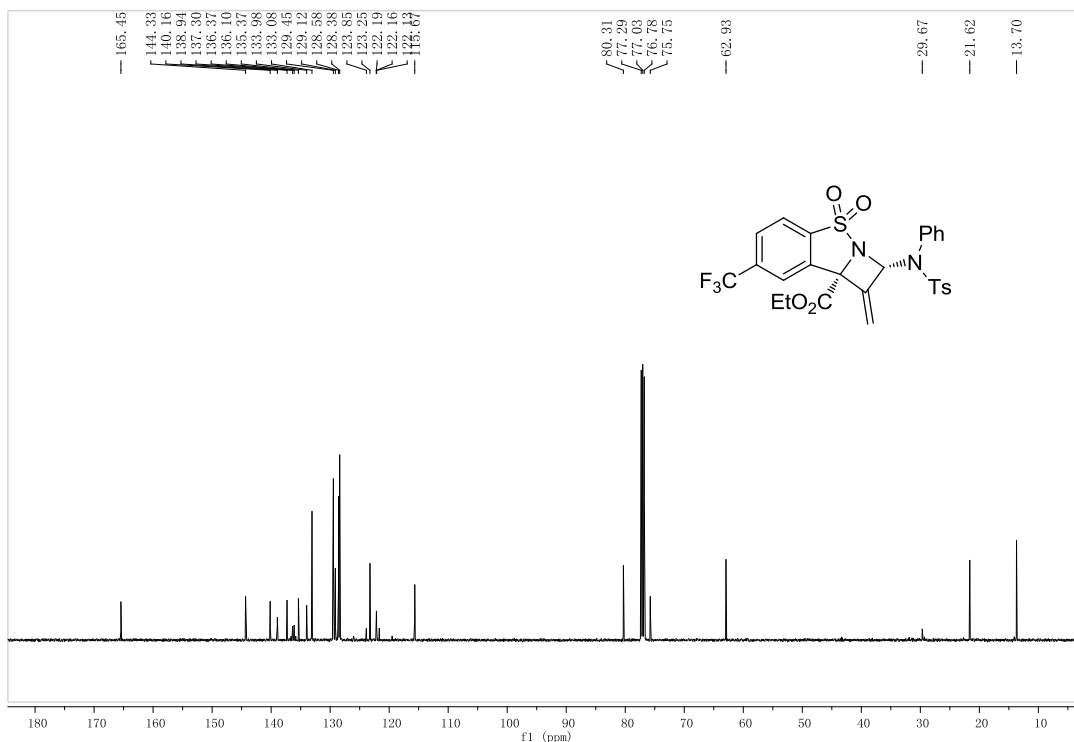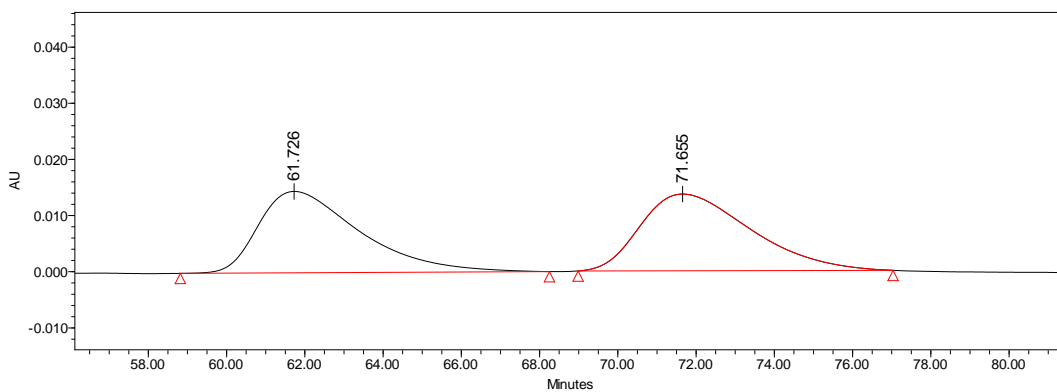

|   | Retention Time | Area    | % Area | Height | % Height |
|---|----------------|---------|--------|--------|----------|
| 1 | 61.726         | 2303726 | 47.43  | 13865  | 50.96    |
| 2 | 71.655         | 2553620 | 52.57  | 13342  | 49.04    |

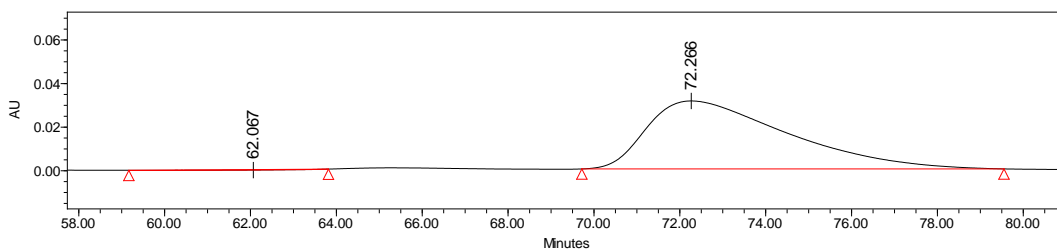

|   | Retention Time | Area    | % Area | Height | % Height |
|---|----------------|---------|--------|--------|----------|
| 1 | 62.067         | 44050   | 0.62   | -234   | 0.74     |
| 2 | 72.266         | 7093834 | 99.38  | 31202  | 99.26    |

Ethyl 2-((4-methyl-N-phenylphenyl)sulfonamido)-1-methylene-7-(trifluoromethoxy)-1,2-dihydro-8bH-azeto[1,2-b]benzo[d]isothiazole-8b-carboxylate 4,4-dioxide (**3ak**)

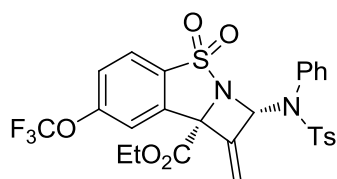

Reaction time: 4 hours. Purified by chromatography on silica gel, eluting with ethyl acetate/petroleum ether 1:3 (v/v), Rf: 0.4; light yellow oil, 55% yield,  $[\alpha]_D^{15} = -0.6$  ( $c = 1.0$  in  $\text{CH}_2\text{Cl}_2$ ), 98% ee [Lux 5u Cellulose-2 column (25 cm  $\times$  0.46 cm ID), n-hexane/*i*-PrOH = 80/20, 0.7 mL/min, 254 nm;  $t_{\text{major}} = 33.1$  min,  $t_{\text{minor}} = 29.3$  min];  $^1\text{H}$  NMR (500 MHz,  $\text{CDCl}_3$ ):  $\delta$  7.84 (d,  $J = 9.0$  Hz, 1H), 7.70 (d,  $J = 8.0$  Hz, 2H), 7.44-7.48 (m, 2H), 7.35 (t,  $J = 7.5$  Hz, 1H), 7.29 (dd,  $J = 14.5, 6.5$  Hz, 4H), 7.24 (d,  $J = 7.5$  Hz, 2H), 6.86 (t,  $J = 2.5$  Hz, 1H), 5.76 (t,  $J = 2.5$  Hz, 1H), 5.47 (t,  $J = 2.5$  Hz, 1H), 3.92-4.00 (m, 2H), 2.44 (s, 3H), 1.05 (t,  $J = 7.0$  Hz, 3H).  $^{13}\text{C}$  NMR (125 MHz,  $\text{CDCl}_3$ ):  $\delta$  165.4, 153.2, 144.3, 140.3, 139.0, 135.4, 134.02, 133.96, 133.1, 129.4, 129.1, 128.6, 128.4, 124.2, 123.5, 120.1 (q,  $J = 258.8$  Hz), 119.1, 116.7, 115.5, 80.3, 75.4, 62.9, 21.6, 13.7. HRMS  $m/z$  (ESI<sup>+</sup>): Calculated for  $\text{C}_{27}\text{H}_{24}\text{F}_3\text{N}_2\text{O}_7\text{S}_2$  ( $[\text{M}+\text{H}]^+$ ) 609.0972, found 609.0986.

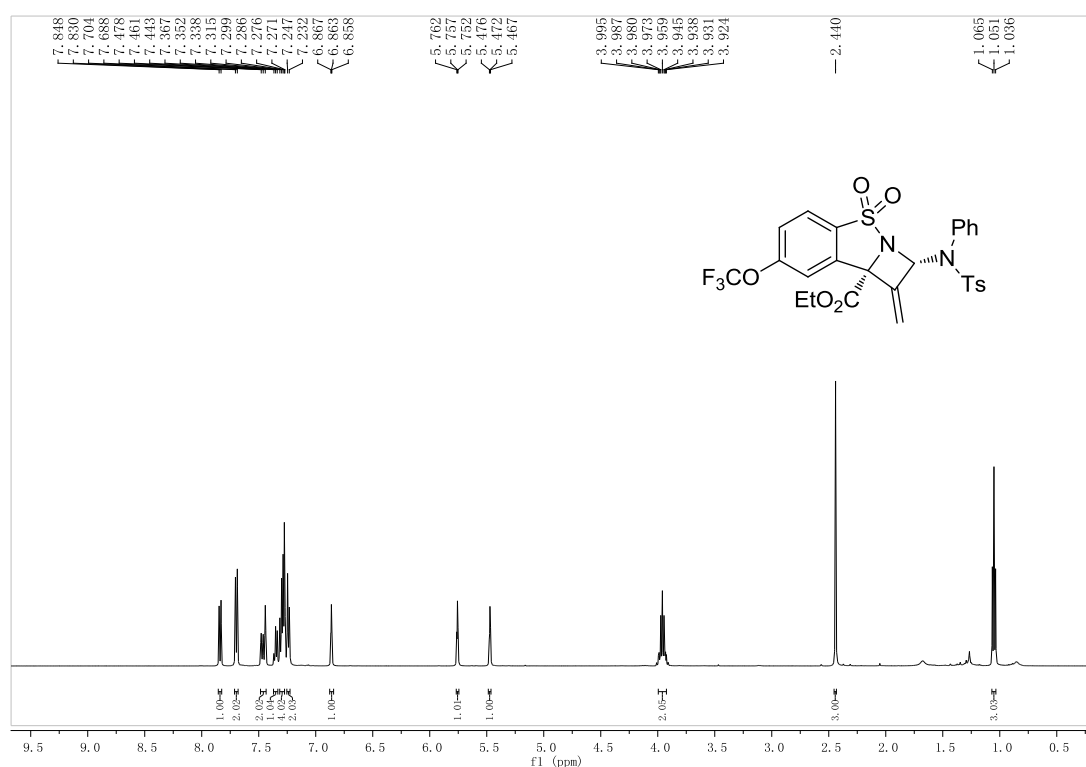



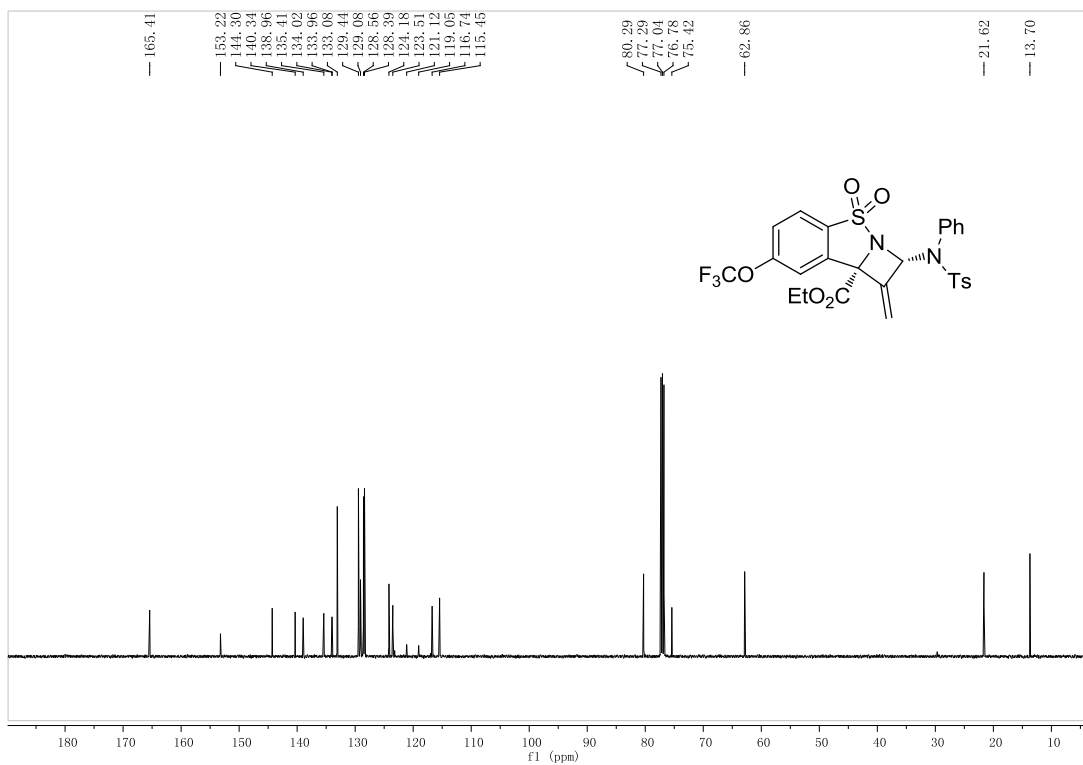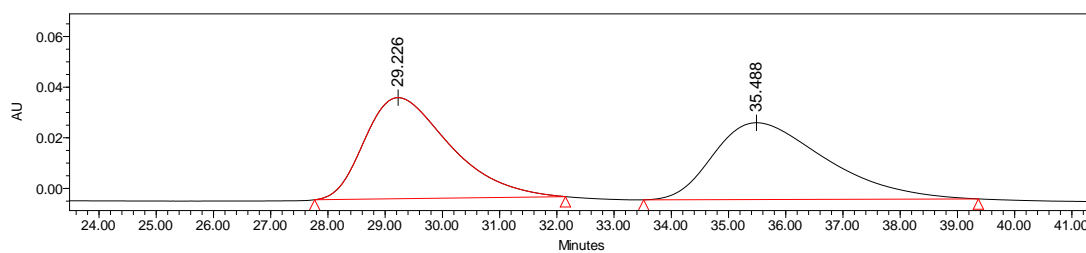

|   | Retention Time | Area    | % Area | Height | % Height |
|---|----------------|---------|--------|--------|----------|
| 1 | 29.226         | 4396167 | 50.63  | 40615  | 57.08    |
| 2 | 35.488         | 4287157 | 49.37  | 30541  | 42.92    |

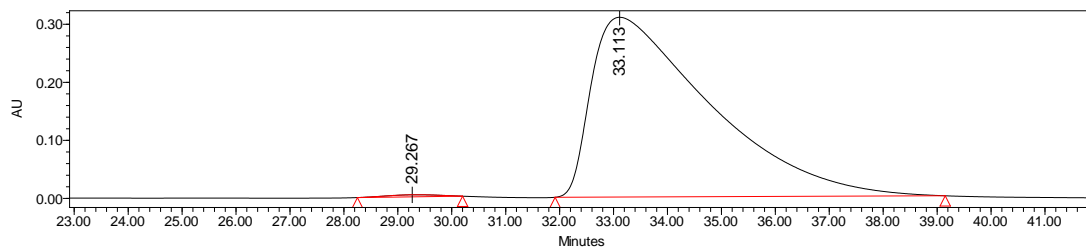

|   | Retention Time | Area     | % Area | Height | % Height |
|---|----------------|----------|--------|--------|----------|
| 1 | 29.267         | 238550   | 0.50   | 3544   | 1.13     |
| 2 | 33.113         | 47318785 | 99.50  | 309619 | 98.87    |

*Rac+Opt*

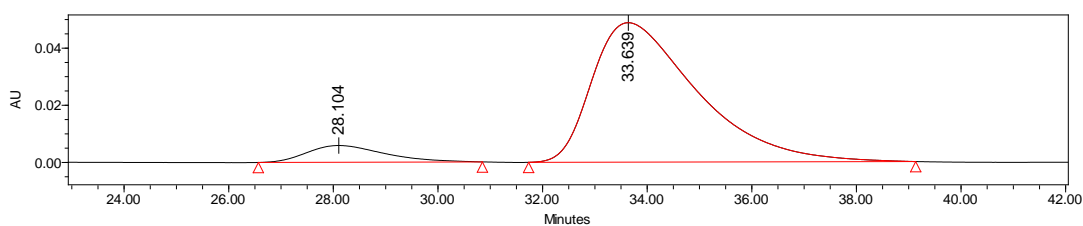

|   | Retention Time | Area    | % Area | Height | % Height |
|---|----------------|---------|--------|--------|----------|
| 1 | 28.104         | 603597  | 8.13   | 5865   | 10.73    |
| 2 | 33.639         | 6817606 | 91.87  | 48797  | 89.27    |

Ethyl 5-chloro-2-((4-methyl-N-phenylphenyl)sulfonamido)-1-methylene-1,2-dihydro-8bH-azeto[1,2-b]benzo[d]isothiazole-8b-carboxylate 4,4-dioxide (**3al**)

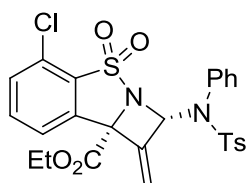

Reaction time: 3 hours. Purified by chromatography on silica gel, eluting with ethyl acetate/petroleum ether 1:3 (v/v), Rf: 0.3; yellow solid, 64% yield, m.p. 110-112 °C,  $[\alpha]_D^{15} = -23$  (c = 1.0 in CH<sub>2</sub>Cl<sub>2</sub>), 94% ee [Daicel Chiralcel AD-H column (25 cm × 0.46 cm ID), n-hexane/*i*-PrOH = 80/20, 0.8 mL/min, 254 nm;  $t_{\text{major}} = 27.0$  min,  $t_{\text{minor}} = 12.9$  min]; <sup>1</sup>H NMR (500 MHz, CDCl<sub>3</sub>): δ 7.71 (d, *J* = 8.5 Hz, 2H), 7.53-7.60 (m, 2H), 7.51 (dd, *J* = 7.0, 1.0 Hz, 1H), 7.32-7.37 (m, 1H), 7.30 (d, *J* = 8.0 Hz, 2H), 7.27-7.29 (m, 2H), 7.21-7.25 (m, 2H), 6.88 (t, *J* = 2.5 Hz, 1H), 5.76 (t, *J* = 2.5 Hz, 1H), 5.46 (t, *J* = 2.5 Hz, 1H), 3.88-3.97 (m, 2H), 2.43 (s, 3H), 1.04 (t, *J* = 7.0 Hz, 3H). <sup>13</sup>C NMR (125 MHz, CDCl<sub>3</sub>): δ 165.7, 144.2, 140.4, 138.7, 135.4, 135.3, 134.1, 133.8, 133.1, 131.7, 129.7, 129.4, 129.0, 128.5, 128.4, 122.8, 115.4, 80.4, 74.9, 62.7, 21.6, 13.7. HRMS *m/z* (ESI+): Calculated for C<sub>26</sub>H<sub>24</sub>ClN<sub>2</sub>O<sub>6</sub>S<sub>2</sub> ([M+H]<sup>+</sup>) 559.0759, found 559.0759.

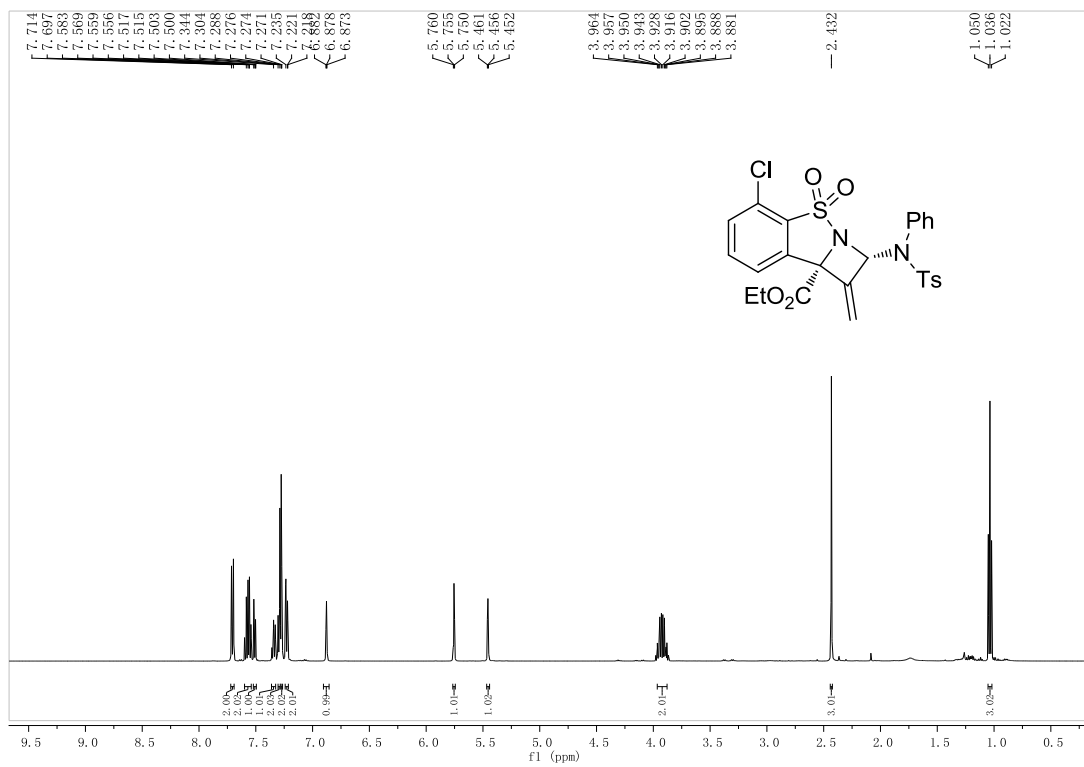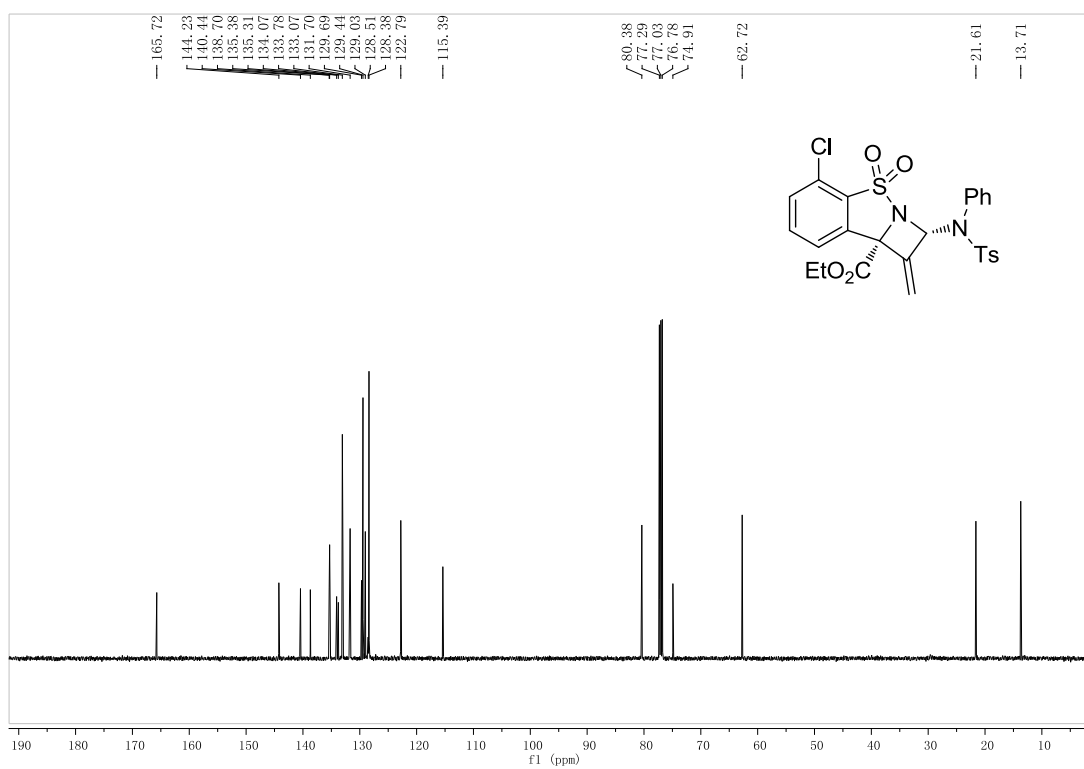

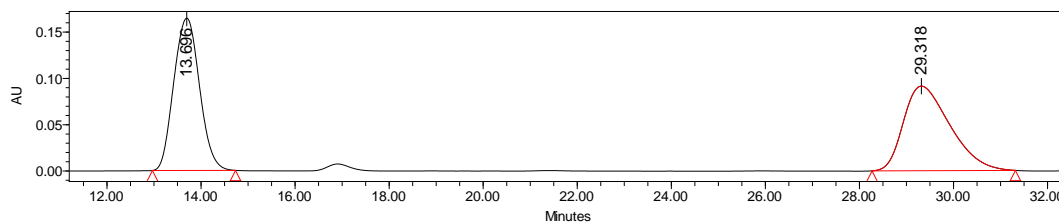

|   | Retention Time | Area    | % Area | Height | % Height |
|---|----------------|---------|--------|--------|----------|
| 1 | 13.696         | 6259622 | 49.69  | 164645 | 64.23    |
| 2 | 29.318         | 6337304 | 50.31  | 91703  | 35.77    |

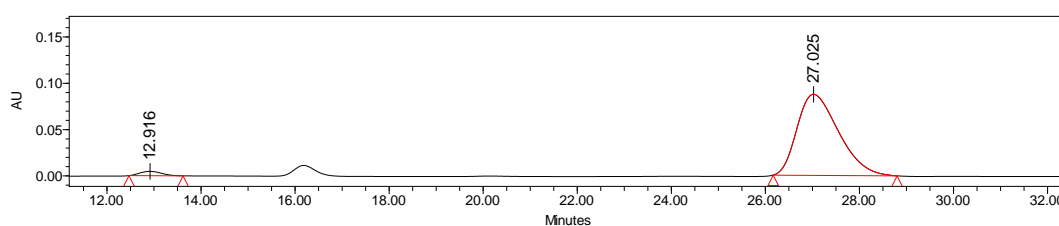

|   | Retention Time | Area    | % Area | Height | % Height |
|---|----------------|---------|--------|--------|----------|
| 1 | 12.916         | 150356  | 2.73   | 4668   | 5.07     |
| 2 | 27.025         | 5362009 | 97.27  | 87492  | 94.93    |

Ethyl 2-((4-methyl-N-phenylphenyl)sulfonamido)-1-methylene-5-(trifluoromethoxy)-1,2-dihydro-8bH-azeto[1,2-b]benzo[d]isothiazole-8b-carboxylate 4,4-dioxide (**3am**)

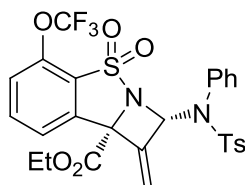

Reaction time: 3 hours. Purified by chromatography on silica gel, eluting with ethyl acetate/petroleum ether 1:3 (v/v), Rf: 0.4; light yellow solid, 76% yield, m.p. 134-136 °C,  $[\alpha]_D^{15} = -10.8$  (c = 1.0 in CH<sub>2</sub>Cl<sub>2</sub>), 93% ee [Daicel Chiralcel AD-H column (25 cm × 0.46 cm ID), n-hexane/i-PrOH = 80/20, 1.0 mL/min, 254 nm;  $t_{\text{major}} = 9.2$  min,  $t_{\text{minor}} = 7.2$  min]; <sup>1</sup>H NMR (500 MHz, CDCl<sub>3</sub>): δ 7.69 (t, *J* = 8.0 Hz, 3H), 7.50 (d, *J* = 7.5 Hz, 1H), 7.43 (dd, *J* = 8.0, 2.0 Hz, 1H), 7.32-7.37 (m, 1H), 7.27-7.31 (m, 4H), 7.20-7.23 (m, 2H), 6.89 (t, *J* = 2.0 Hz, 1H), 5.76 (t, *J* = 2.5 Hz, 1H), 5.46 (t, *J* = 2.5 Hz,

1H), 3.89-3.98 (m, 2H), 2.43 (s, 3H), 1.04 (t,  $J = 7.5$  Hz, 3H).  $^{13}\text{C}$  NMR (125 MHz,  $\text{CDCl}_3$ ):  $\delta$  165.6, 144.3, 144.2, 140.4, 139.3, 136.2, 135.3, 134.1, 133.1, 129.5, 129.0, 128.5, 128.4, 127.5, 122.0, 120.23, 120.17 (q,  $J = 260.0$  Hz), 115.4, 80.4, 75.4, 62.8, 21.6, 13.7. HRMS  $m/z$  (ESI+): Calculated for  $\text{C}_{27}\text{H}_{24}\text{F}_3\text{N}_2\text{O}_7\text{S}_2$  ( $[\text{M}+\text{H}]^+$ ) 609.0972, found 609.0979.

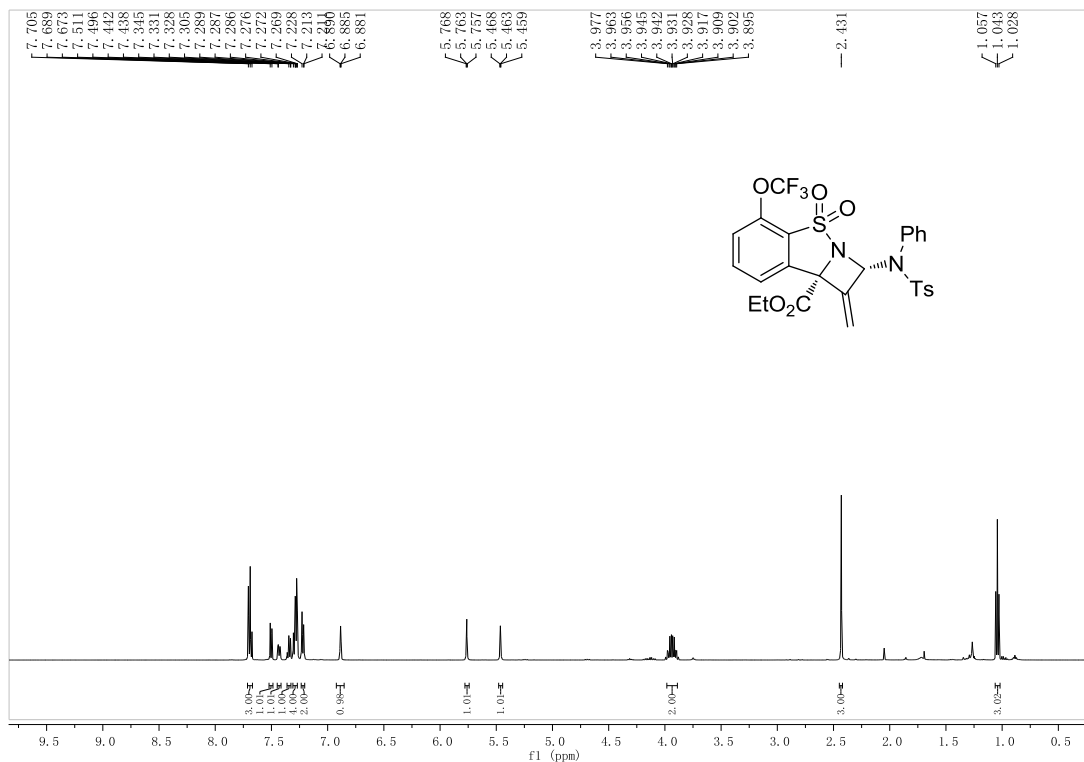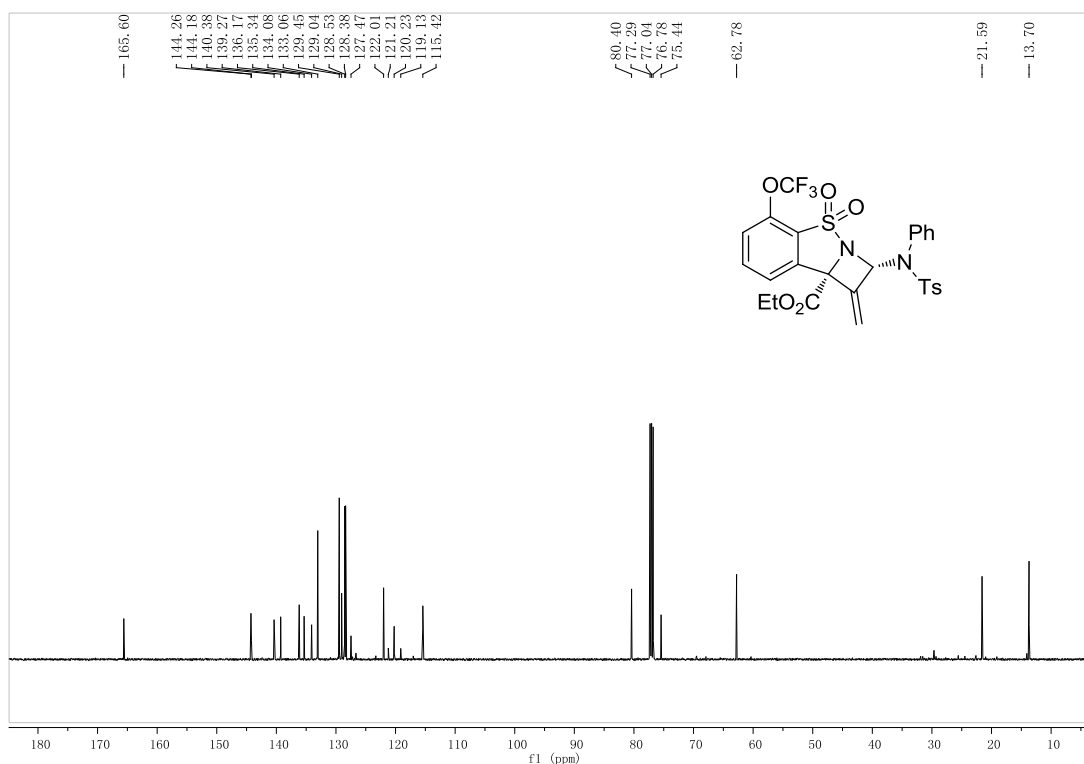

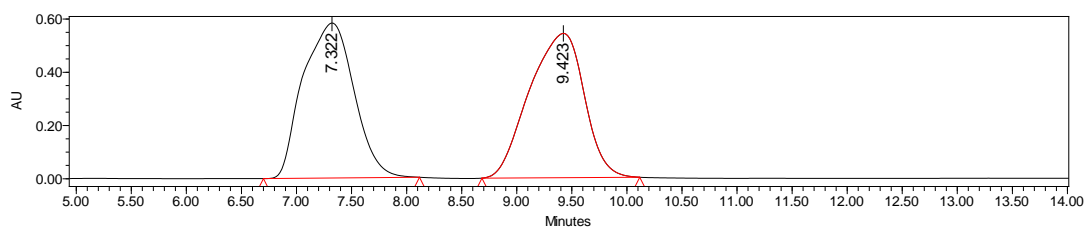

|   | Retention Time | Area     | % Area | Height | % Height |
|---|----------------|----------|--------|--------|----------|
| 1 | 7.322          | 18449284 | 49.36  | 578515 | 51.57    |
| 2 | 9.423          | 18926146 | 50.64  | 543285 | 48.43    |

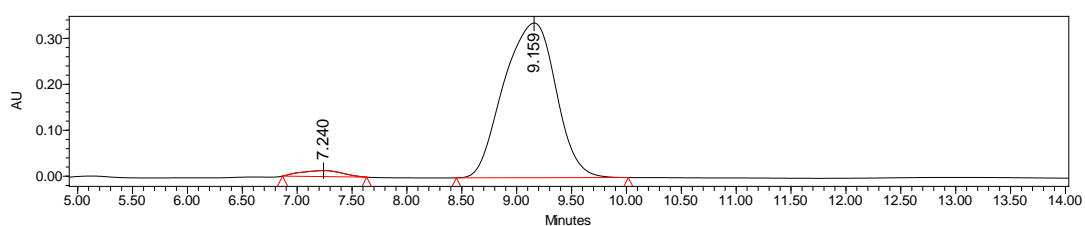

|   | Retention Time | Area     | % Area | Height | % Height |
|---|----------------|----------|--------|--------|----------|
| 1 | 7.240          | 343676   | 2.99   | 13043  | 3.73     |
| 2 | 9.159          | 11152147 | 97.01  | 337056 | 96.27    |

Ethyl 8-((4-methyl-N-phenylphenyl)sulfonamido)-7-methylene-7,8-dihydro-6bH-azeto[1,2-b]naphtho[2,1-d]isothiazole-6b-carboxylate 10,10-dioxide (**3an**)

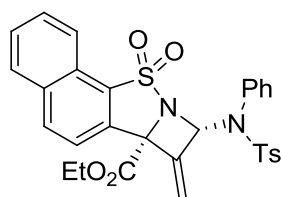

Reaction time: 5 hours. Purified by chromatography on silica gel, eluting with ethyl acetate/petroleum ether 1:3 (v/v), Rf: 0.3; light yellow solid, 70% yield, m.p. 162-164 °C,  $[\alpha]_D^{15} = -75.0$  (c = 1.0 in  $\text{CH}_2\text{Cl}_2$ ), 94% ee [Daicel Chiralcel AD-H column (25 cm  $\times$  0.46 cm ID), n-hexane/i-PrOH = 80/20, 1.0 mL/min, 254 nm;  $t_{\text{major}} = 51.0$  min,  $t_{\text{minor}} = 28.5$  min];  $^1\text{H NMR}$  (500 MHz,  $\text{CDCl}_3$ ):  $\delta$  8.47 (d,  $J = 8.5$  Hz, 1H), 8.09 (d,  $J = 8.5$  Hz, 1H), 7.98 (d,  $J = 8.0$  Hz, 1H), 7.75-7.79 (m, 3H), 7.67-7.71 (m, 1H), 7.58 (d,  $J = 8.5$  Hz, 1H), 7.34-7.37 (m, 1H), 7.29-7.33 (m, 6H), 6.94 (t,  $J = 2.5$  Hz, 1H), 5.81 (t,  $J$

= 2.5 Hz, 1H), 5.46 (t,  $J = 2.5$  Hz, 1H), 3.91-3.99 (m, 2H), 2.46 (s, 3H), 1.05 (t,  $J = 7.0$  Hz, 3H).  $^{13}\text{C}$  NMR (125 MHz,  $\text{CDCl}_3$ ):  $\delta$  166.2, 159.4, 144.2, 140.9, 136.3, 135.8, 135.5, 135.4, 134.1, 131.0, 129.4, 129.0, 128.5, 125.2, 124.5, 122.3, 118.0, 115.4, 114.9, 80.2, 76.2, 62.6, 55.2, 21.6, 13.7. HRMS  $m/z$  (ESI $^+$ ): Calculated for  $\text{C}_{30}\text{H}_{27}\text{N}_2\text{O}_6\text{S}_2$  ( $[\text{M}+\text{H}]^+$ ) 575.1305, found 575.1292.

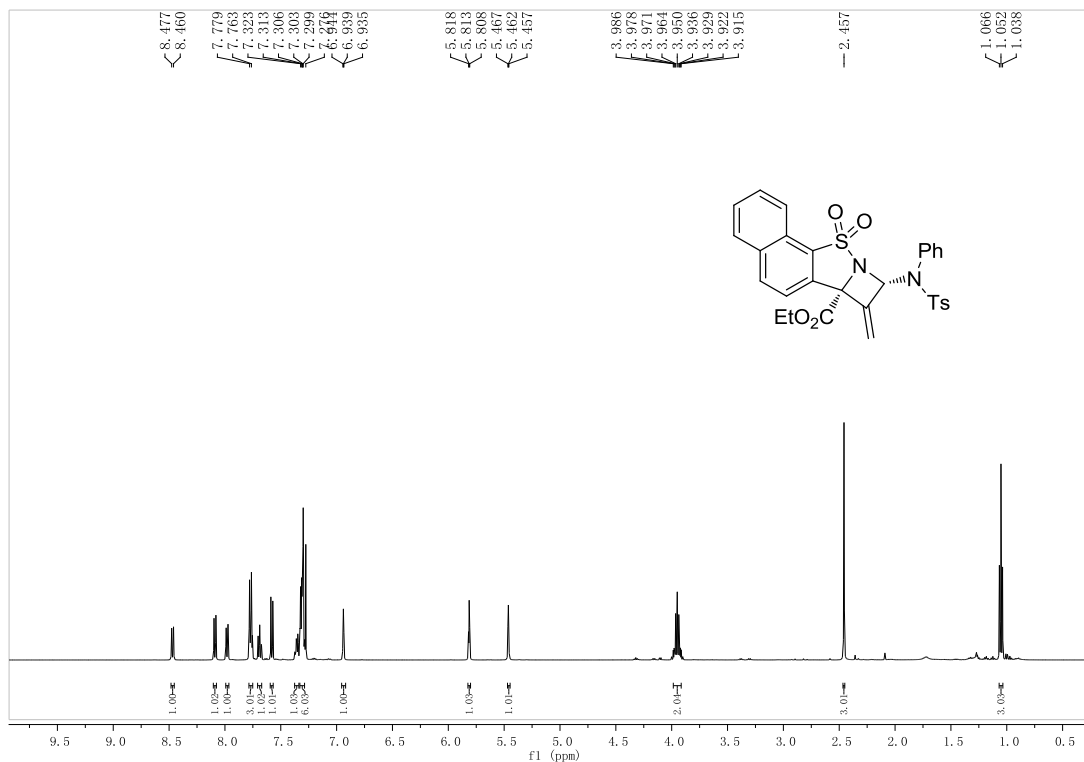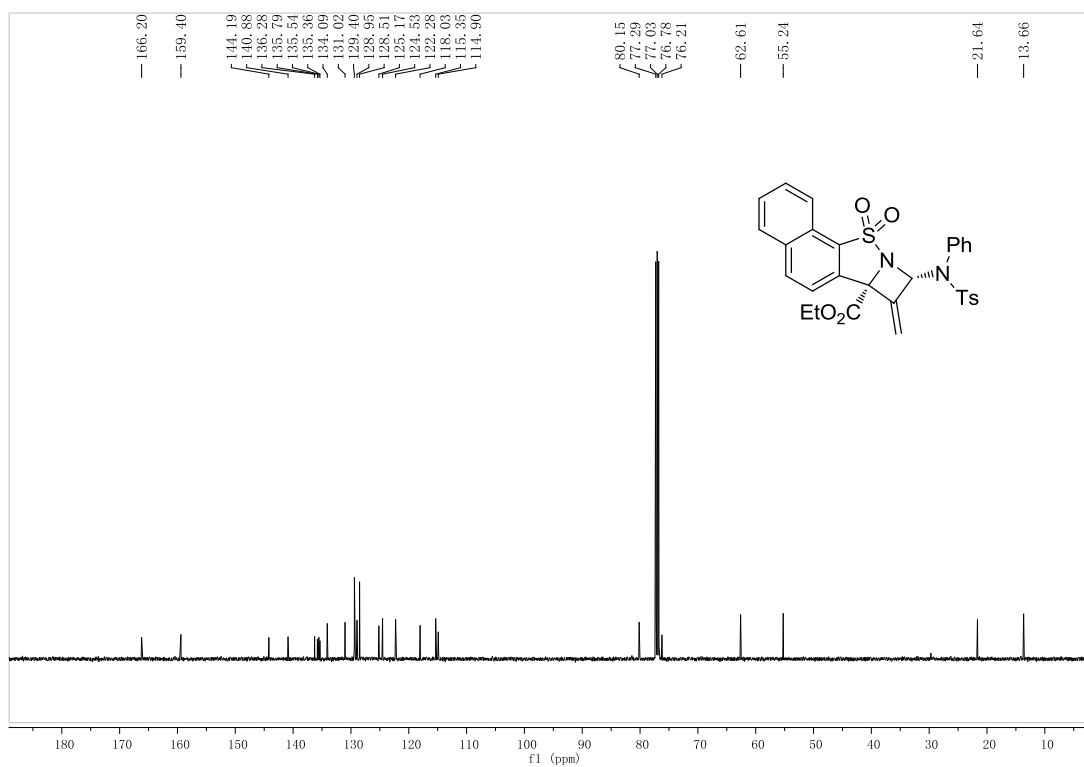

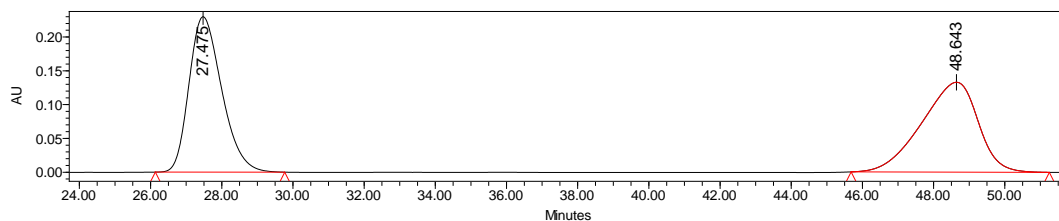

|   | Retention Time | Area     | % Area | Height | % Height |
|---|----------------|----------|--------|--------|----------|
| 1 | 27.475         | 14668336 | 49.99  | 229839 | 63.36    |
| 2 | 48.643         | 14672164 | 50.01  | 132918 | 36.64    |

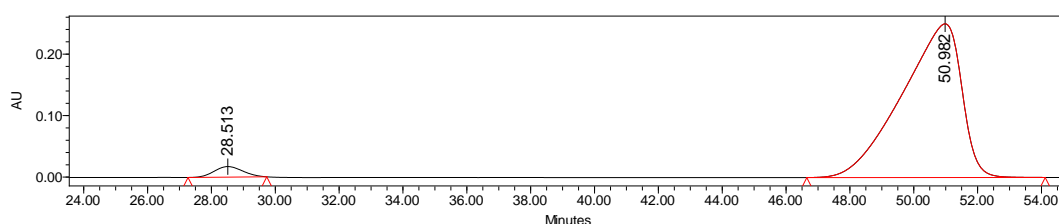

|   | Retention Time | Area     | % Area | Height | % Height |
|---|----------------|----------|--------|--------|----------|
| 1 | 28.513         | 985069   | 2.97   | 16550  | 6.24     |
| 2 | 50.982         | 32146204 | 97.03  | 248806 | 93.76    |

Ethyl 2-((4-methyl-N-(p-tolyl)sulfonamido)-1-methylene-1,2-dihydro-8bH-azeto[1,2-b]benzo[d]isothiazole-8b-carboxylate 4,4-dioxide (**3ba**)

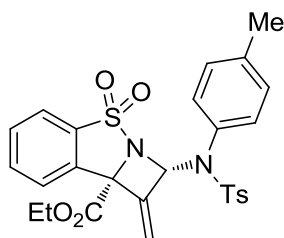

Reaction time: 2.5 hours. Purified by chromatography on silica gel, eluting with ethyl acetate/petroleum ether 1:3 (v/v), Rf: 0.3; light yellow solid, 75% yield, m.p. 176-178 °C,  $[\alpha]_D^{15} = 16.3$  (c = 1.0 in CH<sub>2</sub>Cl<sub>2</sub>), 99% ee [Lux 5u Cellulose-2 column (25 cm × 0.46 cm ID), n-hexane/*i*-PrOH = 80/20, 0.7 mL/min, 254 nm;  $t_{\text{major}} = 53.6$  min,  $t_{\text{minor}} = 45.8$  min]; <sup>1</sup>H NMR (500 MHz, CDCl<sub>3</sub>): δ 7.78-7.81 (m, 1H), 7.73 (d, *J* = 8.5 Hz, 2H), 7.61-7.67 (m, 3H), 7.28 (d, *J* = 8.0 Hz, 2H), 7.10 (q, *J* = 8.5 Hz, 4H), 6.81 (t,



$J = 2.5$  Hz, 1H), 5.75 (t,  $J = 2.5$  Hz, 1H), 5.42 (t,  $J = 2.5$  Hz, 1H), 3.94 (m, 2H), 2.44 (s, 3H), 2.34 (s, 3H), 1.04 (t,  $J = 7.0$  Hz, 3H).  $^{13}\text{C}$  NMR (125 MHz,  $\text{CDCl}_3$ ):  $\delta$  166.2, 144.1, 141.0, 138.9, 136.3, 135.8, 135.7, 134.1, 132.8, 131.4, 131.0, 129.4, 129.2, 128.4, 124.5, 122.2, 114.9, 80.2, 76.1, 62.5, 21.6, 21.2, 13.7. HRMS  $m/z$  (ESI $^{+}$ ): Calculated for  $\text{C}_{27}\text{H}_{27}\text{N}_2\text{O}_6\text{S}_2$  ( $[\text{M}+\text{H}]^{+}$ ) 539.1305, found 539.1301.

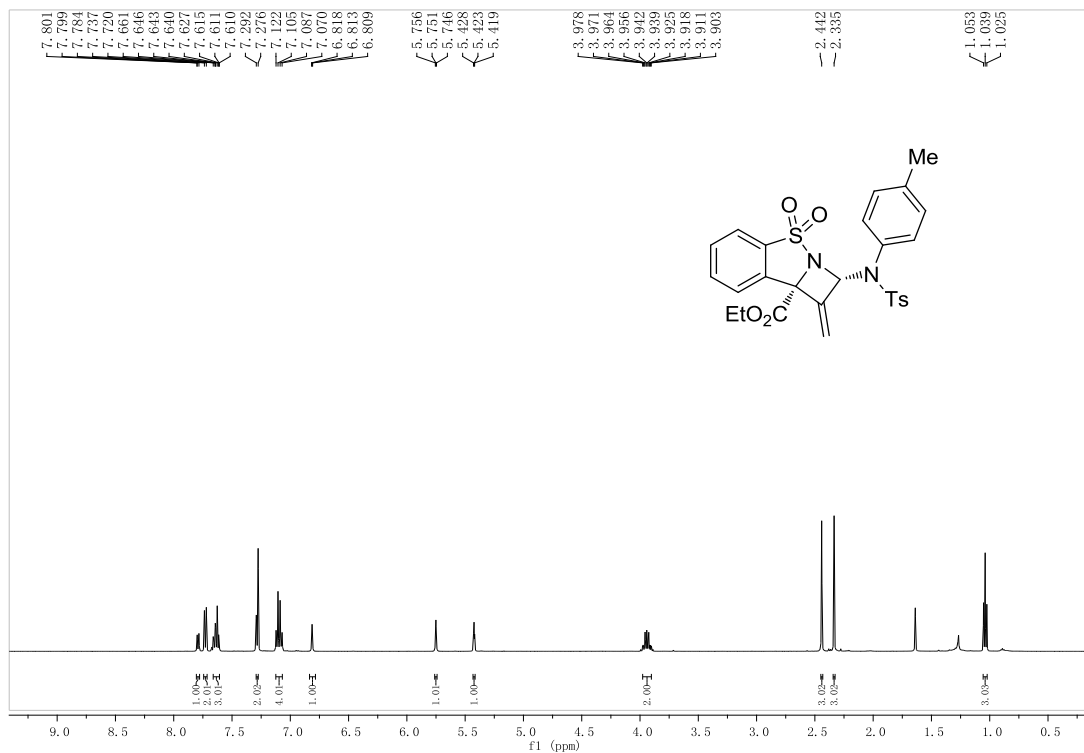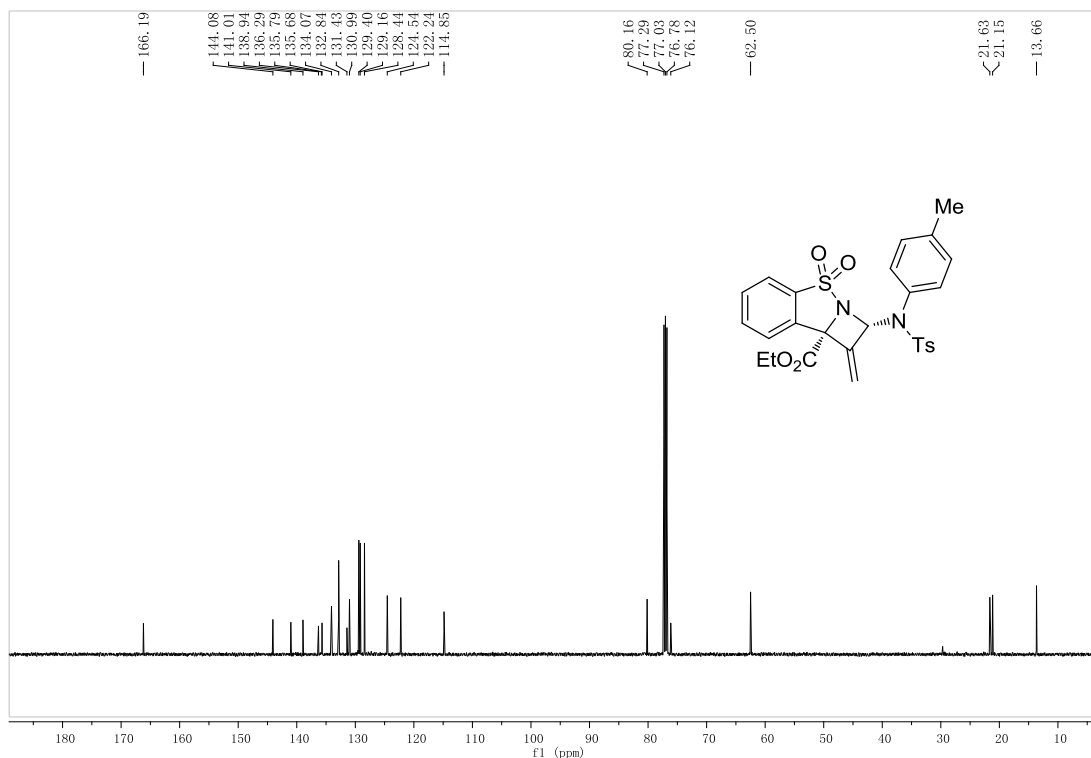

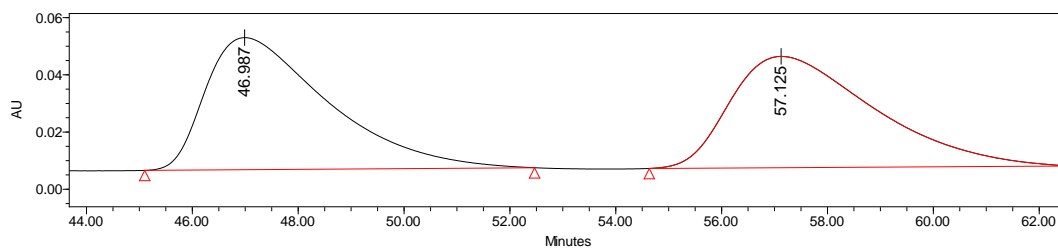

|   | Retention Time | Area    | % Area | Height | % Height |
|---|----------------|---------|--------|--------|----------|
| 1 | 46.987         | 7400891 | 50.15  | 46191  | 54.27    |
| 2 | 57.125         | 7357154 | 49.85  | 38919  | 45.73    |

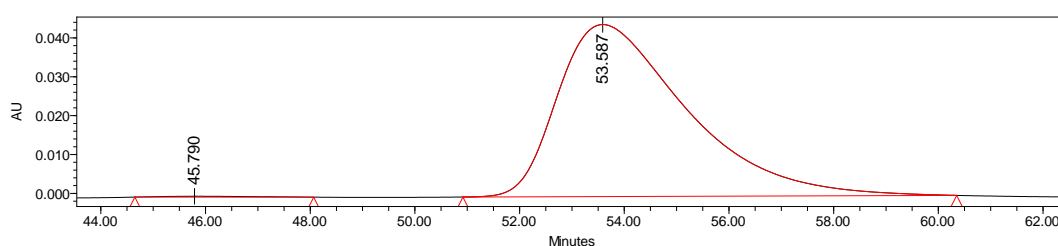

|   | Retention Time | Area    | % Area | Height | % Height |
|---|----------------|---------|--------|--------|----------|
| 1 | 45.790         | 50175   | 0.65   | 328    | 0.74     |
| 2 | 53.587         | 7670105 | 99.35  | 44263  | 99.26    |

Ethyl 2-((N-(4-bromophenyl)-4-methylphenyl)sulfonamido)-1-methylene-1,2-dihydro-8bH-azeto[1,2-b]benzo[d]isothiazole-8b-carboxylate 4,4-dioxide (**3ca**)

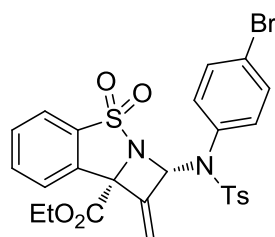

Reaction time: 3 hours. Purified by chromatography on silica gel, eluting with ethyl acetate/petroleum ether 1:3 (v/v), Rf: 0.4; light yellow solid, 67% yield, m.p. 130-132 °C,  $[\alpha]_D^{15} = 2.0$  (c = 1.0 in  $\text{CH}_2\text{Cl}_2$ ), 97% ee [Lux 5u Cellulose-2 column (25 cm  $\times$  0.46 cm ID), n-hexane/i-PrOH = 80/20, 0.7 mL/min, 254 nm;  $t_{\text{major}} = 46.9$  min,  $t_{\text{minor}} = 30.9$  min];  $^1\text{H NMR}$  (500 MHz,  $\text{CDCl}_3$ ):  $\delta$  7.77-7.80 (m, 1H), 7.72 (d,  $J = 8.5$  Hz, 2H), 7.61-7.67 (m, 3H), 7.40-7.44 (m, 2H), 7.30 (d,  $J = 8.0$  Hz, 2H), 7.11-7.15 (m, 2H),

6.80 (t,  $J = 2.0$  Hz, 1H), 5.76 (t,  $J = 2.5$  Hz, 1H), 5.41 (t,  $J = 2.5$  Hz, 1H), 3.93-4.02 (m, 2H), 2.44 (s, 3H), 1.06 (t,  $J = 7.0$  Hz, 3H).  $^{13}\text{C}$  NMR (125 MHz,  $\text{CDCl}_3$ ):  $\delta$  165.9, 144.5, 140.8, 136.0, 135.6, 135.2, 134.7, 134.2, 133.2, 131.8, 131.1, 129.5, 128.3, 124.6, 123.5, 122.2, 115.0, 79.8, 76.2, 62.7, 21.6, 13.7. HRMS  $m/z$  (ESI $^+$ ): Calculated for  $\text{C}_{27}\text{H}_{24}\text{BrN}_2\text{O}_6\text{S}_2$  ( $[\text{M}+\text{H}]^+$ ) 603.0254, found 603.0257.

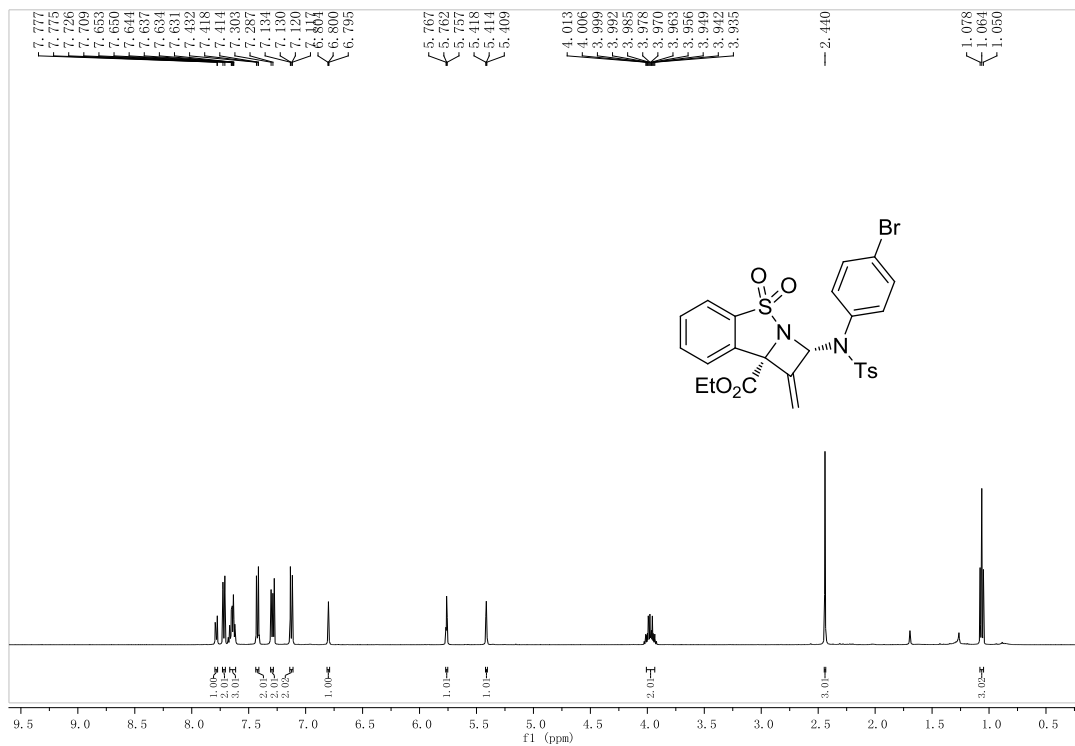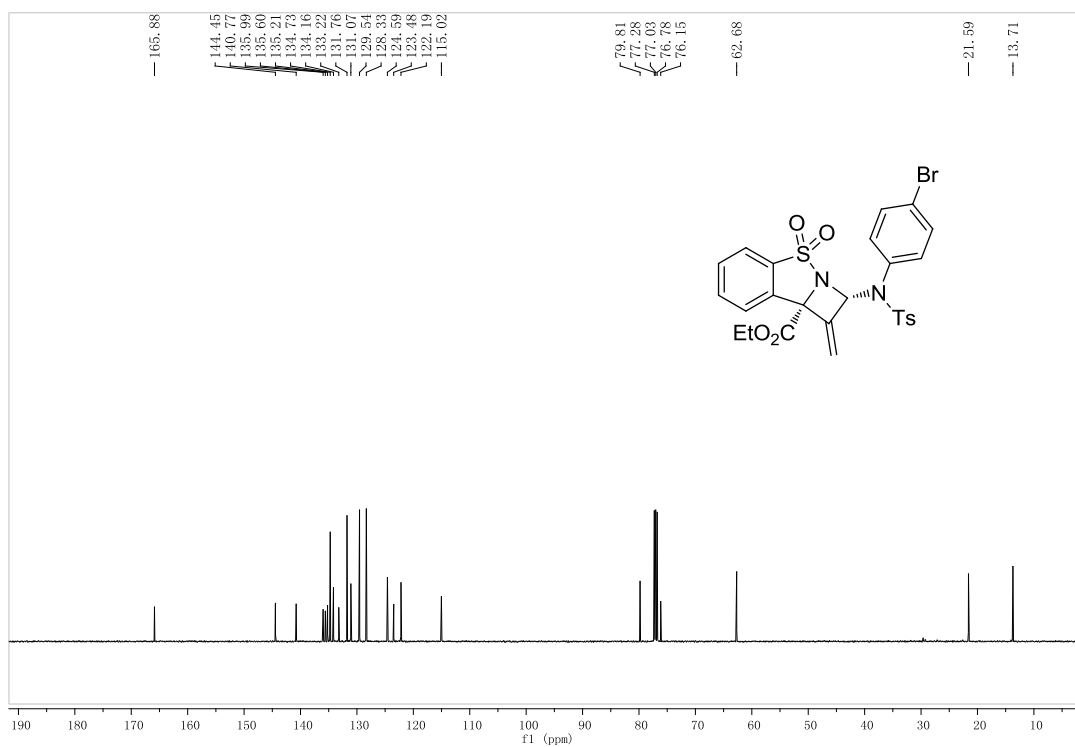

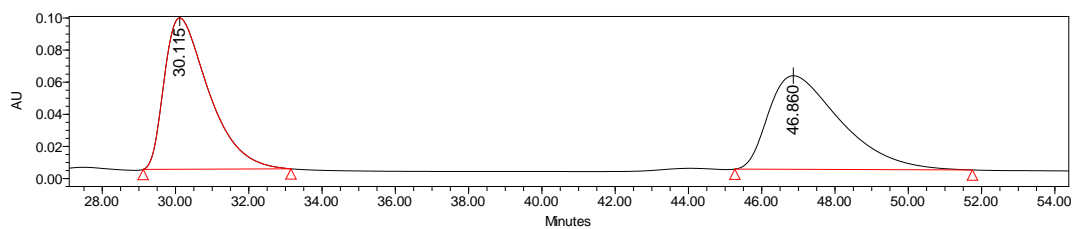

|   | Retention Time | Area    | % Area | Height | % Height |
|---|----------------|---------|--------|--------|----------|
| 1 | 30.115         | 8091519 | 50.12  | 94803  | 61.82    |
| 2 | 46.860         | 8054285 | 49.88  | 58548  | 38.18    |

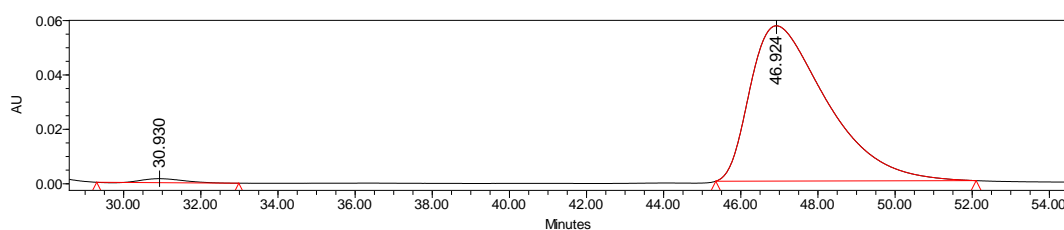

|   | Retention Time | Area    | % Area | Height | % Height |
|---|----------------|---------|--------|--------|----------|
| 1 | 30.930         | 114456  | 1.43   | 1472   | 2.51     |
| 2 | 46.924         | 7885985 | 98.57  | 57085  | 97.49    |

Ethyl 2-((N-(3-methoxyphenyl)-4-methylphenyl)sulfonamido)-1-methylene-1,2-dihydro-8bH-azeto[1,2-b]benzo[d]isothiazole-8b-carboxylate 4,4-dioxide (**3da**)

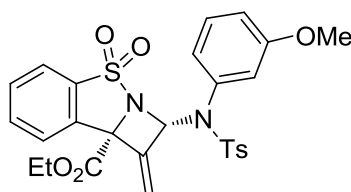

Reaction time: 2 hours. Purified by chromatography on silica gel, eluting with ethyl acetate/petroleum ether 1:3 (v/v), R<sub>f</sub>: 0.3; light yellow solid, 78% yield, m.p. 96-98 °C, [α]<sub>D</sub><sup>15</sup> = -4.0 (c = 1.0 in CH<sub>2</sub>Cl<sub>2</sub>), 99% ee [Lux 5u Cellulose-2 column (25 cm × 0.46 cm ID), n-hexane/*i*-PrOH = 80/20, 0.7 mL/min, 254 nm; t<sub>major</sub> = 55.9 min, t<sub>minor</sub> = 49.4 min]; <sup>1</sup>H NMR (500 MHz, CDCl<sub>3</sub>) δ 7.79-7.81 (m, 1H), 7.75 (d, *J* = 8.5 Hz, 2H), 7.61-7.67 (m, 3H), 7.30 (d, *J* = 8.5 Hz, 2H), 7.18 (t, *J* = 8.0 Hz, 1H), 6.85-6.90 (m, 2H), 6.78 (dt, *J* = 11.0, 2.5 Hz, 2H), 5.76 (t, *J* = 2.5 Hz, 1H), 5.42 (t, *J* = 2.5 Hz, 1H),

3.92-4.02 (m, 2H), 3.70 (s, 3H), 2.44 (s, 3H), 1.07 (t,  $J = 7.0$  Hz, 3H).  $^{13}\text{C}$  NMR (125 MHz,  $\text{CDCl}_3$ )  $\delta$  166.1, 144.2, 140.8, 135.6, 135.4, 135.1, 134.3, 134.1, 133.1, 131.4, 129.5, 129.0, 128.7, 128.5, 128.4, 125.7, 123.0, 119.7, 115.2, 80.3, 76.0, 62.6, 21.6, 13.8. HRMS  $m/z$  (ESI $^+$ ): Calculated for  $\text{C}_{27}\text{H}_{27}\text{N}_2\text{O}_7\text{S}_2$  ( $[\text{M}+\text{H}]^+$ ) 555.1254, found 555.1250.

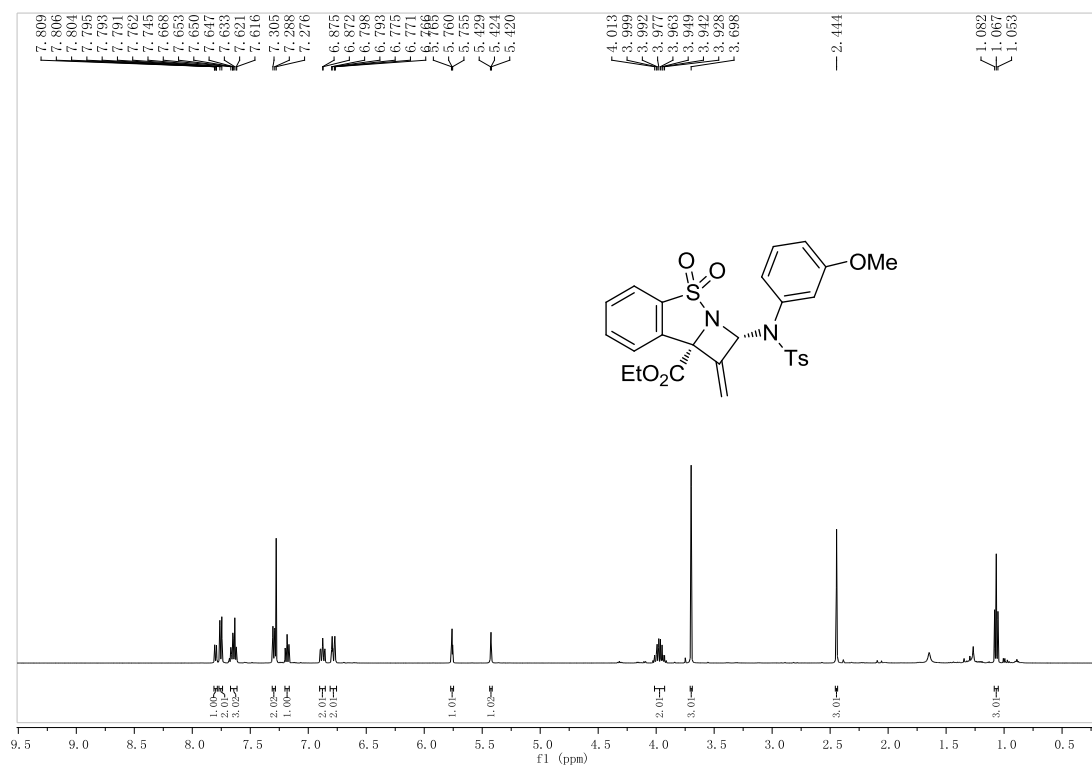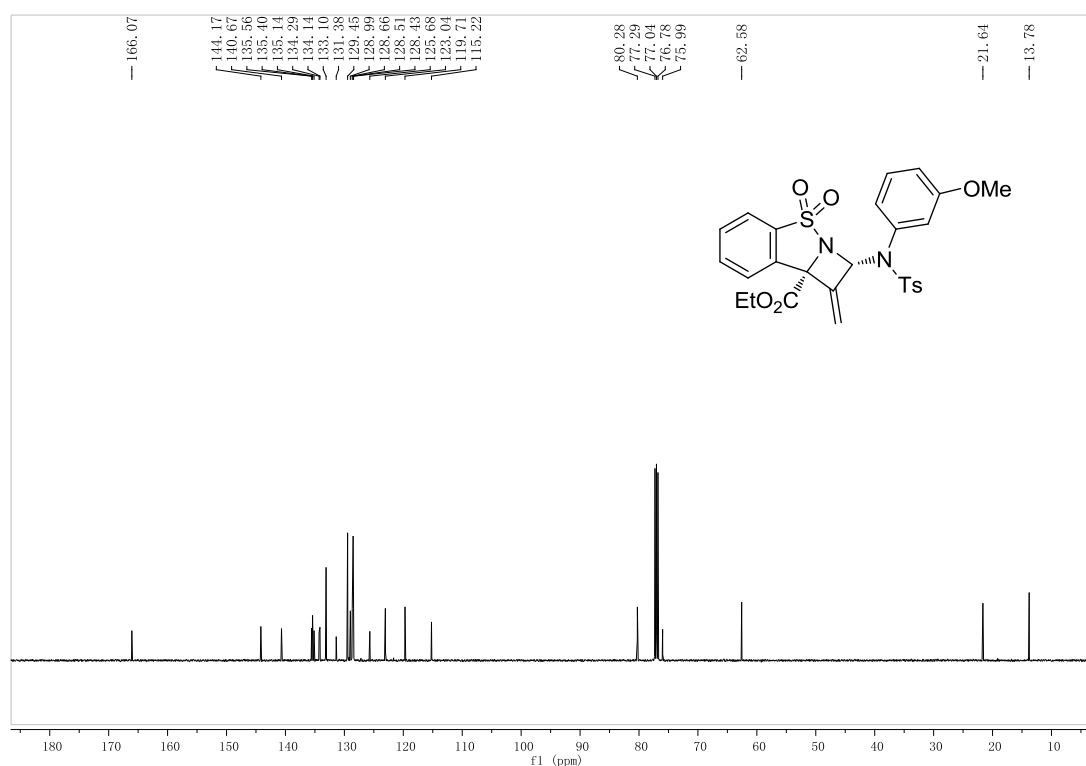

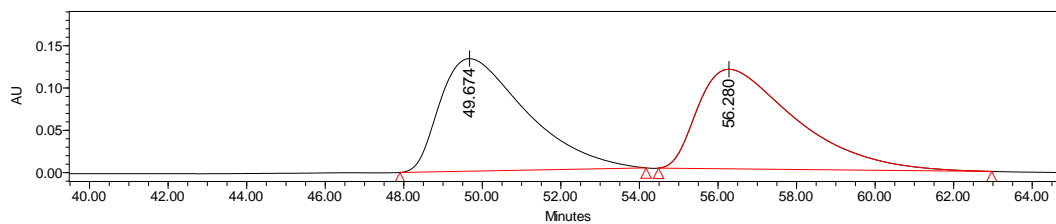

|   | Retention Time | Area     | % Area | Height | % Height |
|---|----------------|----------|--------|--------|----------|
| 1 | 49.674         | 20324451 | 49.83  | 132957 | 53.02    |
| 2 | 56.280         | 20465282 | 50.17  | 117794 | 46.98    |

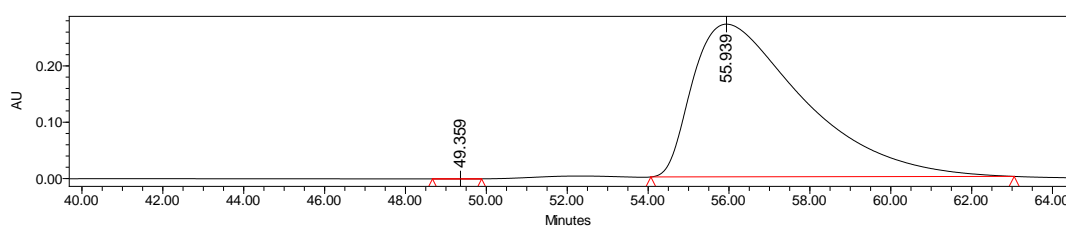

|   | Retention Time | Area     | % Area | Height | % Height |
|---|----------------|----------|--------|--------|----------|
| 1 | 49.359         | 3008     | 0.01   | -59    | 0.02     |
| 2 | 55.939         | 51760505 | 99.99  | 271111 | 99.98    |

Ethyl 2-((N-benzyl-4-methylphenyl)sulfonamido)-1-methylene-1,2-dihydro-8bH-azeto[1,2-b]benzo[d]isothiazole-8b-carboxylate 4,4-dioxide (**3ea**)

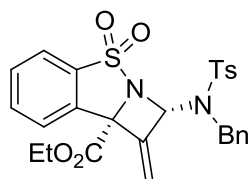

Reaction time: 3 hours. Purified by chromatography on silica gel, eluting with ethyl acetate/petroleum ether 1:3 (v/v), Rf: 0.4; light yellow solid, 71% yield, m.p. 126-128 °C [ $\alpha$ ]<sub>D</sub><sup>15</sup> = 1.7 (c = 1.0 in CH<sub>2</sub>Cl<sub>2</sub>), 99% ee [Lux 5u Cellulose-2 column (25 cm × 0.46 cm ID), n-hexane/*i*-PrOH = 80/20, 0.7 mL/min, 254 nm;  $t_{\text{major}}$  = 38.1 min,  $t_{\text{minor}}$  = 30.6 min]; <sup>1</sup>H NMR (500 MHz, CDCl<sub>3</sub>):  $\delta$  7.89 (d,  $J$  = 8.5 Hz, 2H), 7.76 (d,  $J$  = 7.5 Hz, 1H), 7.60-7.72 (m, 3H), 7.43 (dd,  $J$  = 7.0, 1.5 Hz, 2H), 7.30 (s, 1H), 7.28 (s, 1H), 7.23 (dt,  $J$  = 6.5, 5.0 Hz, 3H), 6.21 (s, 1H), 5.62 (t,  $J$  = 2.5 Hz, 1H), 5.15 (t,  $J$  = 2.5 Hz, 1H),

4.64 (d,  $J = 15.5$  Hz, 1H), 4.46 (d,  $J = 15.5$  Hz, 1H), 4.24-4.35 (m, 2H), 2.43 (s, 3H), 1.27 (d,  $J = 7.0$  Hz, 3H).  $^{13}\text{C}$  NMR (125 MHz,  $\text{CDCl}_3$ ):  $\delta$  166.3, 143.9, 141.0, 136.6, 136.3, 136.2, 135.7, 134.1, 131.0, 129.5, 128.7, 128.3, 128.2, 127.6, 125.0, 122.2, 113.9, 79.5, 76.3, 62.9, 48.8, 21.5, 14.0. HRMS  $m/z$  (ESI $^+$ ): Calculated for  $\text{C}_{27}\text{H}_{26}\text{N}_2\text{NaO}_6\text{S}_2$  ( $[\text{M}+\text{Na}]^+$ ) 561.1124, found 561.1124.

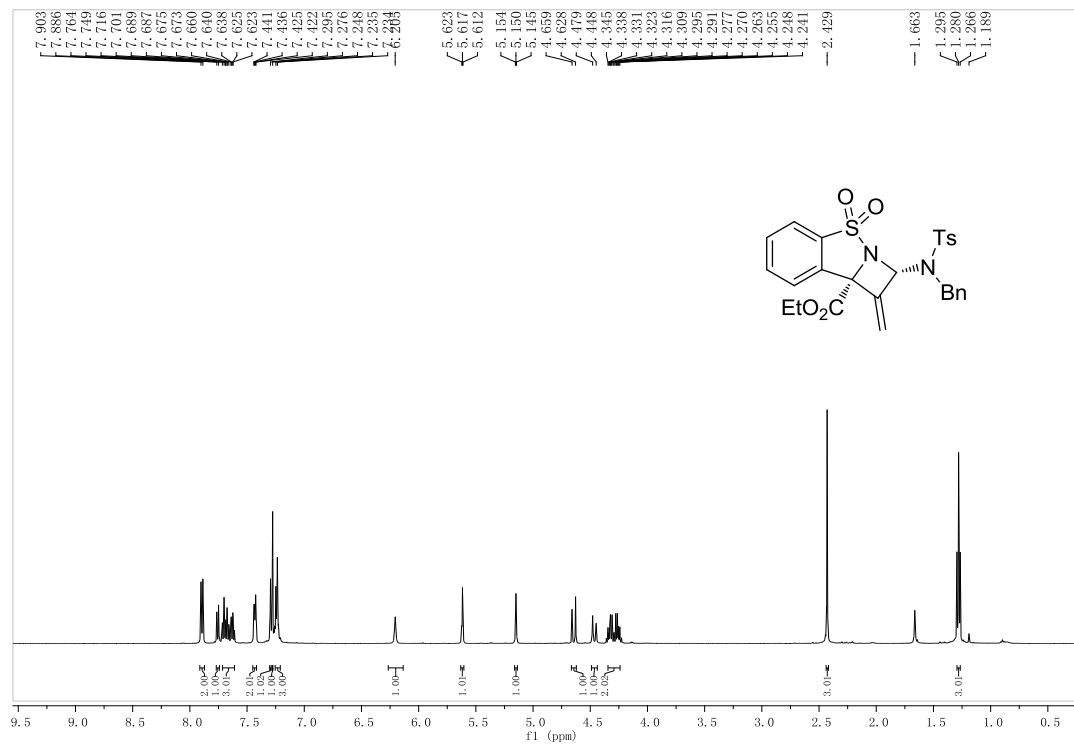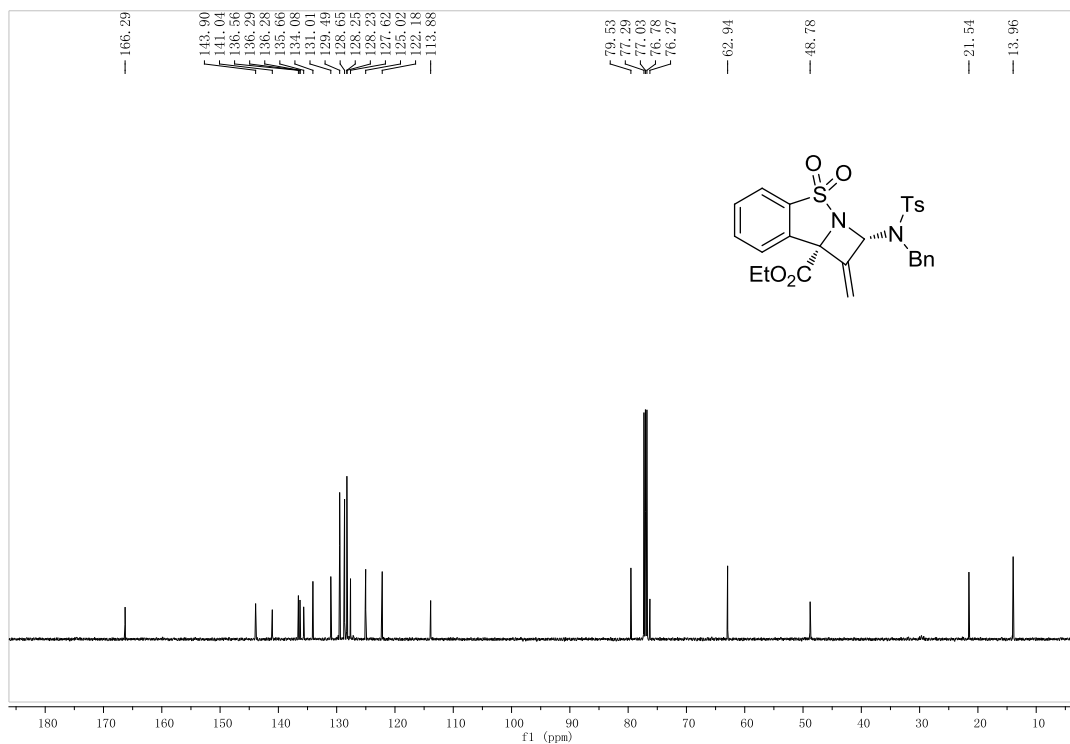

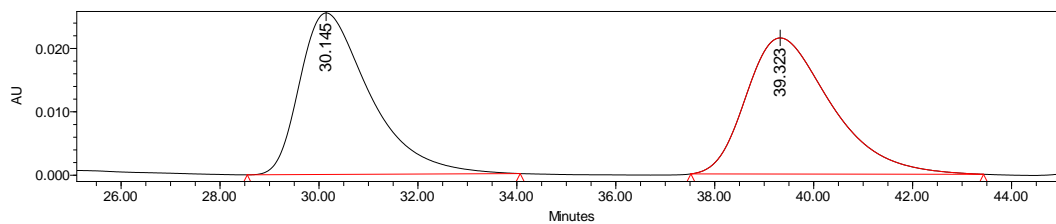

|   | Retention Time | Area    | % Area | Height | % Height |
|---|----------------|---------|--------|--------|----------|
| 1 | 30.145         | 2495188 | 49.10  | 25464  | 54.14    |
| 2 | 39.323         | 2586398 | 50.90  | 21569  | 45.86    |

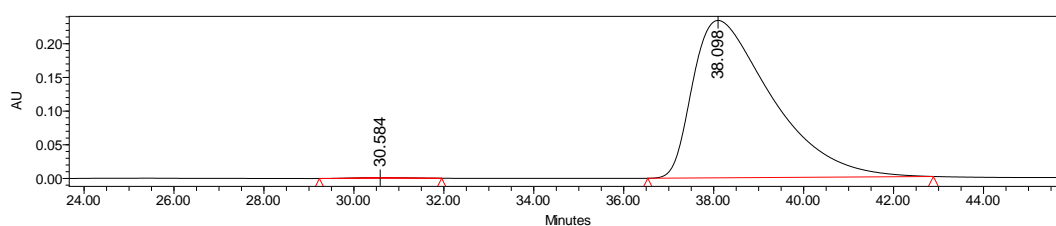

|   | Retention Time | Area     | % Area | Height | % Height |
|---|----------------|----------|--------|--------|----------|
| 1 | 30.584         | 94421    | 0.33   | 1144   | 0.49     |
| 2 | 38.098         | 28569714 | 99.67  | 233830 | 99.51    |

Ethyl 1-methylene-2-(N-phenylphenylsulfonamido)-1,2-dihydro-8bH-azeto[1,2-b]benzo[d]isothiazole-8b-carboxylate 4,4-dioxide (**3fa**)

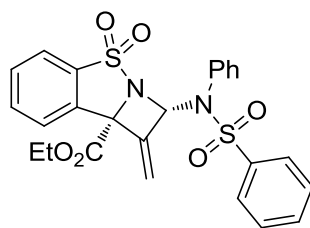

Reaction time: 2 hours. Purified by chromatography on silica gel, eluting with ethyl acetate/petroleum ether 1:3 (v/v), R<sub>f</sub>: 0.4; colourless oil, 70% yield,  $[\alpha]_D^{15} = -9.0$  ( $c = 1.0$  in  $\text{CH}_2\text{Cl}_2$ ), 99% ee [Lux 5u Cellulose-2 column (25 cm  $\times$  0.46 cm ID), n-hexane/i-PrOH = 90/10, 0.8 mL/min, 254 nm;  $t_{\text{major}} = 119.9$  min,  $t_{\text{minor}} = 105.0$  min];  $^1\text{H}$  NMR (500 MHz,  $\text{CDCl}_3$ ):  $\delta$  7.83-7.86 (m, 2H), 7.78-7.81 (m, 1H), 7.59-7.67 (m, 4H), 7.47-7.52 (m, 2H), 7.33-7.37 (m, 1H), 7.27-7.32 (m, 2H), 7.23-7.27 (m, 2H), 6.83 (t,  $J = 2.5$  Hz, 1H), 5.76 (t,  $J = 2.5$  Hz, 1H), 5.44 (t,  $J = 2.5$  Hz, 1H), 3.87-3.99



(m, 2H), 1.04 (t,  $J = 7.0$  Hz, 3H).  $^{13}\text{C}$  NMR (125 MHz,  $\text{CDCl}_3$ ):  $\delta$  166.0, 140.8, 138.4, 136.2, 135.7, 134.1, 134.0, 133.3, 133.1, 131.0, 129.1, 128.8, 128.5, 128.4, 124.5, 122.2, 115.0, 80.0, 76.1, 62.6, 13.7. HRMS  $m/z$  (ESI $^+$ ): Calculated for  $\text{C}_{25}\text{H}_{23}\text{N}_2\text{O}_6\text{S}_2$  ( $[\text{M}+\text{H}]^+$ ) 511.0992, found 511.0991.

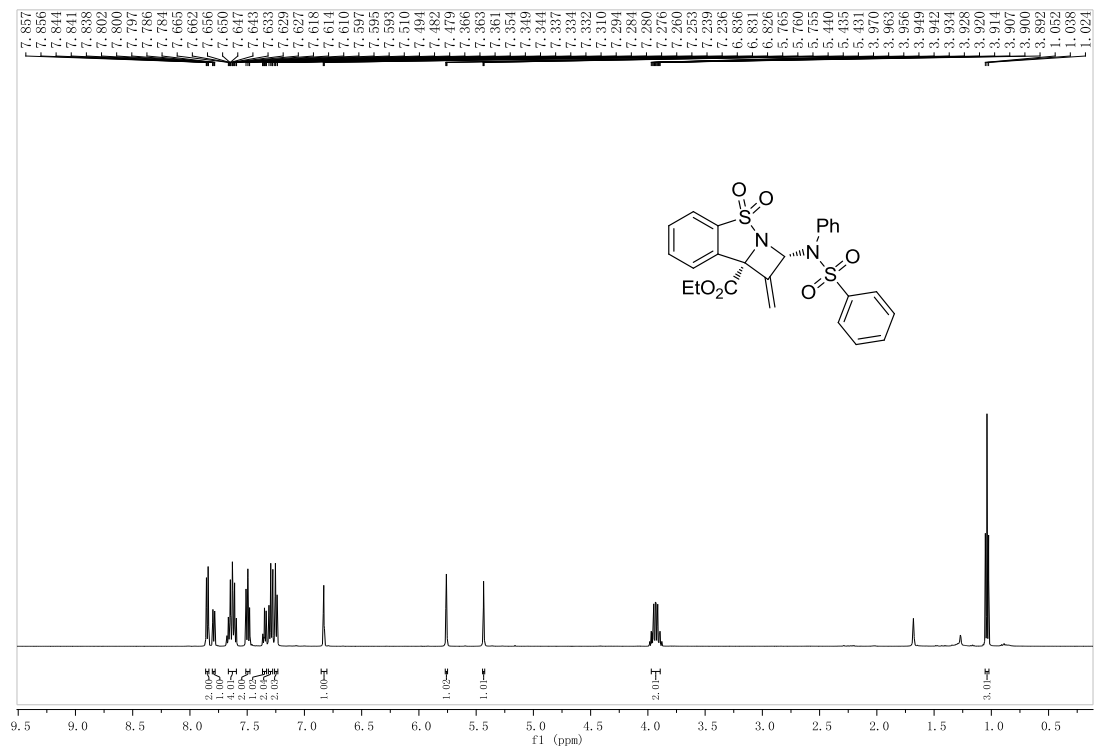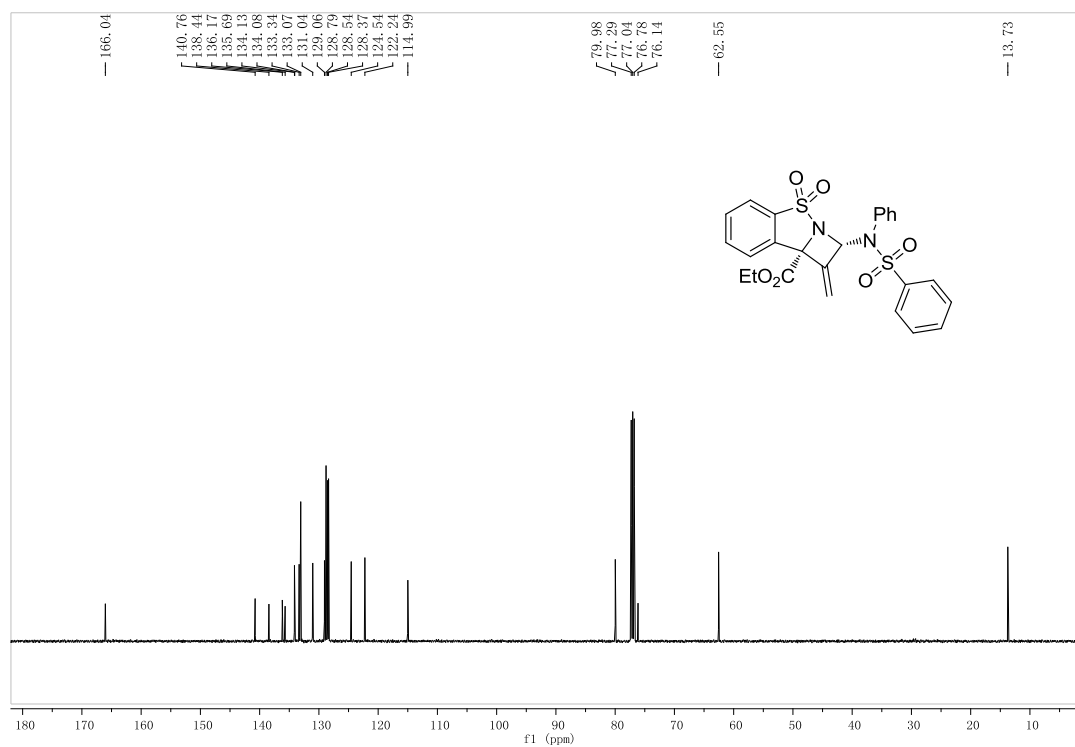

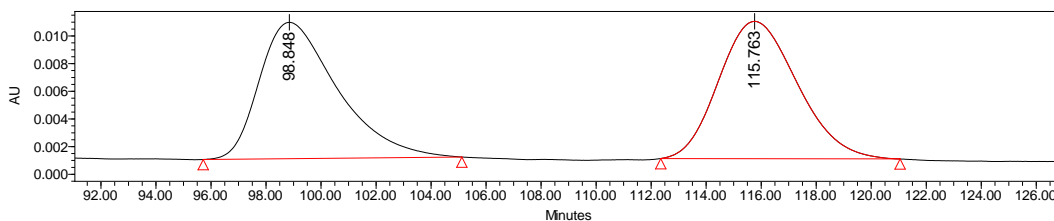

|   | Retention Time | Area    | % Area | Height | % Height |
|---|----------------|---------|--------|--------|----------|
| 1 | 98.848         | 1893381 | 48.50  | 9727   | 49.32    |
| 2 | 115.763        | 2010410 | 51.50  | 9996   | 50.68    |

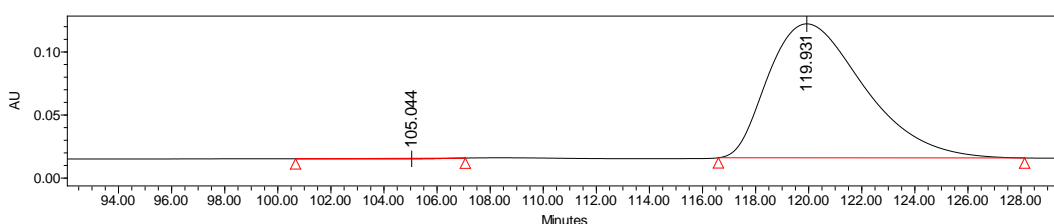

|   | Retention Time | Area     | % Area | Height | % Height |
|---|----------------|----------|--------|--------|----------|
| 1 | 105.044        | 84069    | 0.31   | -385   | 0.36     |
| 2 | 119.931        | 26714091 | 99.69  | 106188 | 99.64    |

Ethyl 2-((4-(tert-butyl)-N-phenylphenyl)sulfonamido)-1-methylene-1,2-dihydro-8bH-azeto[1,2-b]benzo[d]isothiazole-8b-carboxylate 4,4-dioxide (**3ga**)

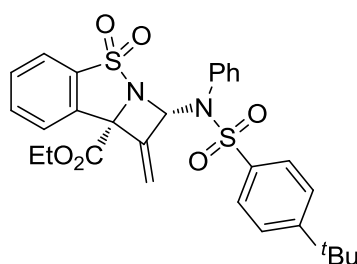

Reaction time: 2 hours. Purified by chromatography on silica gel, eluting with ethyl acetate/petroleum ether 1:3 (v/v), Rf: 0.4; white solid, 80% yield, m.p. 106-108 °C,  $[\alpha]_D^{15} = -1.8$  (c = 1.0 in  $\text{CH}_2\text{Cl}_2$ ), 99% ee [Lux 5u Cellulose-1 column (25 cm  $\times$  0.46 cm ID), n-hexane/*i*-PrOH = 80/20, 0.7 mL/min, 254 nm;  $t_{\text{major}} = 19.0$  min,  $t_{\text{minor}} = 21.6$  min];  $^1\text{H}$  NMR (500 MHz,  $\text{CDCl}_3$ ):  $\delta$  7.81 (dd,  $J = 8.0, 1.5$  Hz, 1H), 7.75-7.78 (m, 2H), 7.62-7.68 (m, 3H), 7.48-7.51 (m, 2H), 7.28-7.35 (m, 4H), 7.26 (d,  $J = 2.0$  Hz,

1H), 6.86 (t,  $J = 2.5$  Hz, 1H), 5.76 (t,  $J = 2.5$  Hz, 1H), 5.44 (t,  $J = 2.5$  Hz, 1H), 3.90-3.98 (m, 2H), 1.36 (s, 9H), 1.04 (t,  $J = 7.5$  Hz, 3H).  $^{13}\text{C}$  NMR (125 MHz,  $\text{CDCl}_3$ ):  $\delta$  166.1, 157.1, 141.0, 136.3, 135.8, 135.6, 134.1, 134.0, 133.2, 131.0, 129.0, 128.5, 128.2, 125.8, 124.6, 122.3, 114.8, 80.0, 76.0, 62.5, 35.2, 31.1, 13.8. HRMS  $m/z$  (ESI $^+$ ): Calculated for  $\text{C}_{29}\text{H}_{31}\text{N}_2\text{O}_6\text{S}_2$  ( $[\text{M}+\text{H}]^+$ ) 567.1618, found 567.1613.

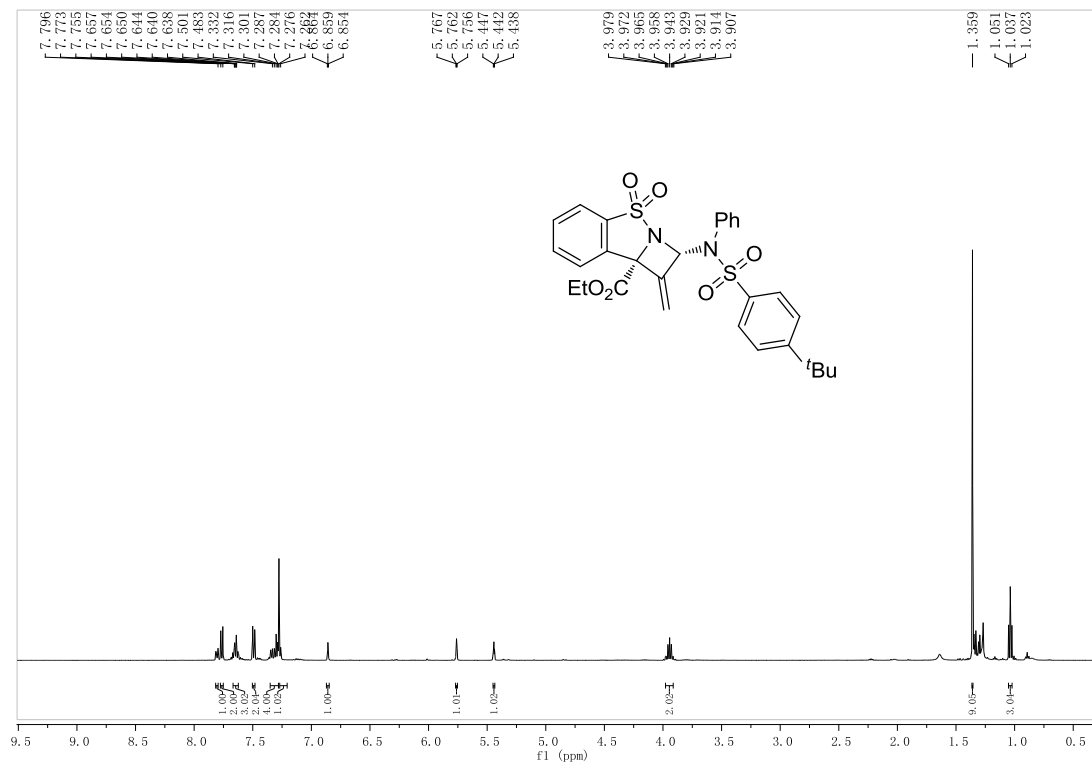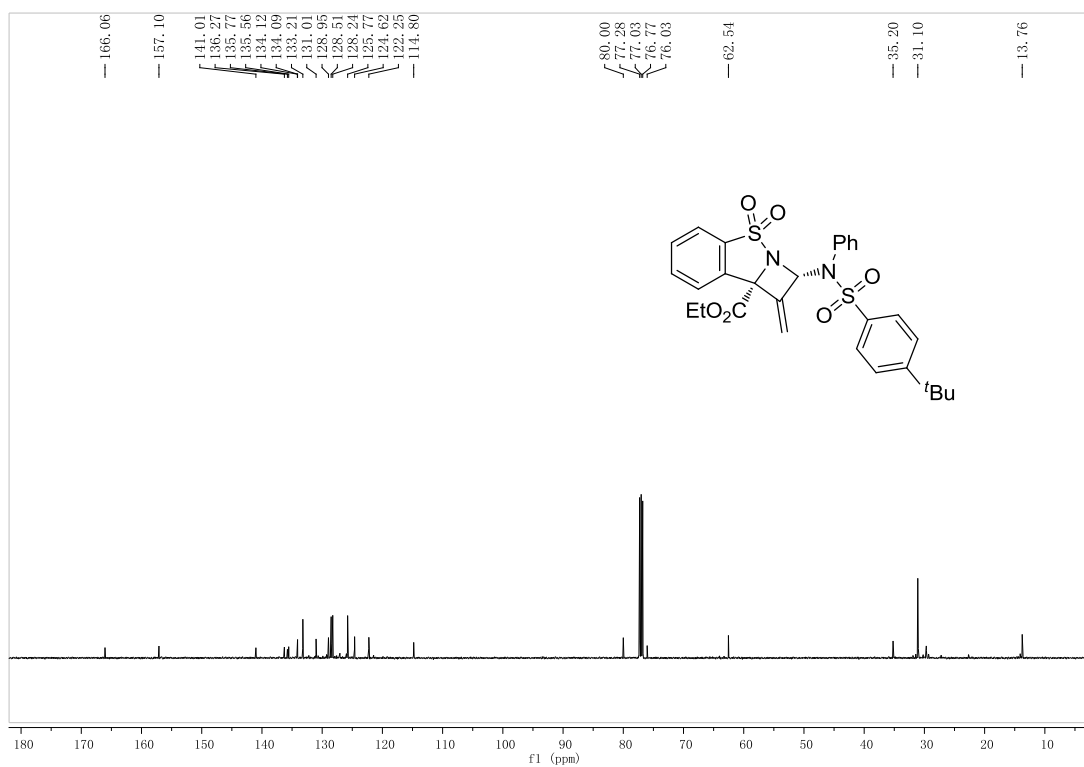

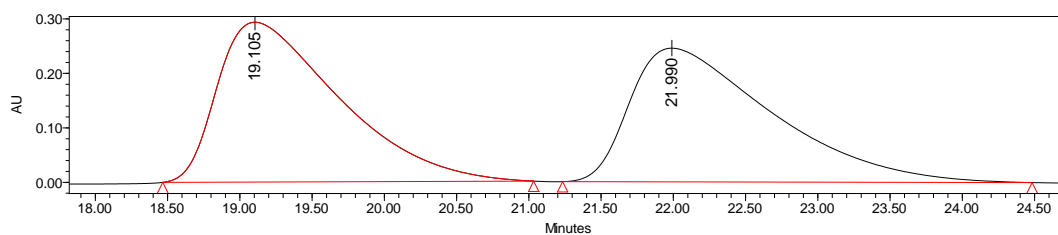

|   | Retention Time | Area     | % Area | Height | % Height |
|---|----------------|----------|--------|--------|----------|
| 1 | 19.105         | 17142762 | 50.55  | 293482 | 54.45    |
| 2 | 21.990         | 16767226 | 49.45  | 245530 | 45.55    |

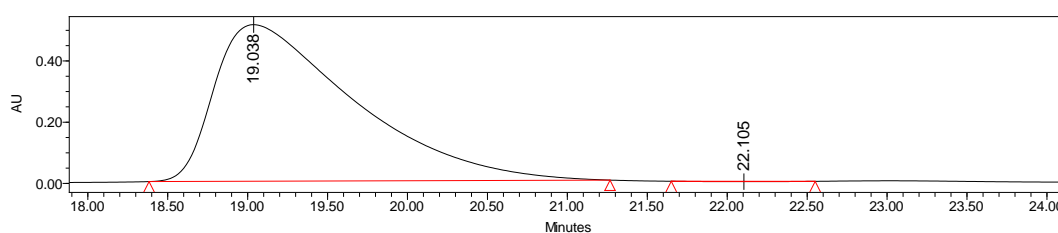

|   | Retention Time | Area     | % Area | Height | % Height |
|---|----------------|----------|--------|--------|----------|
| 1 | 19.038         | 30581333 | 99.71  | 509758 | 99.55    |
| 2 | 21.567         | 87695    | 0.29   | -2324  | 0.45     |

Ethyl 2-((4-methoxy-N-phenylphenyl)sulfonamido)-1-methylene-1,2-dihydro-8bH-azeto[1,2-b]benzo[d]isothiazole-8b-carboxylate 4,4-dioxide (**3ha**)

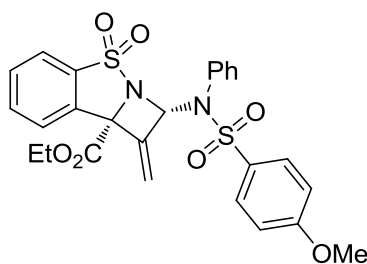

Reaction time: 4 hours. Purified by chromatography on silica gel, eluting with ethyl acetate/petroleum ether 1:3 (v/v), R<sub>f</sub>: 0.2; light yellow solid, 70% yield, m.p. 134-136 °C, [α]<sub>D</sub><sup>15</sup> = -4.6 (c = 1.0 in CH<sub>2</sub>Cl<sub>2</sub>), 94% ee [Daicel Chiralcel OD-H column (25 cm × 0.46 cm ID), n-hexane/i-PrOH = 80/20, 0.7 mL/min, 254 nm; t<sub>major</sub> = 19.6 min, t<sub>minor</sub> = 42.8 min]; <sup>1</sup>H NMR (500 MHz, CDCl<sub>3</sub>): δ 7.76-7.81 (m, 3H), 7.61-7.67 (m, 3H), 7.28-7.35 (m, 3H), 7.25-7.28 (m, 2H), 6.94-6.97 (m, 2H), 6.83 (t, J = 2.5 Hz, 1H),

5.75 (t,  $J = 2.5$  Hz, 1H), 5.43 (t,  $J = 2.5$  Hz, 1H), 3.92-3.96 (m, 2H), 3.89 (s, 3H), 1.05 (t,  $J = 7.5$  Hz, 3H).  $^{13}\text{C}$  NMR (125 MHz,  $\text{CDCl}_3$ ):  $\delta$  166.2, 163.5, 141.0, 136.3, 135.8, 134.4, 134.2, 133.2, 131.1, 130.7, 130.1, 129.0, 128.6, 124.6, 122.3, 114.9, 114.0, 80.2, 76.2, 62.6, 55.6, 13.8. HRMS  $m/z$  (ESI $^+$ ): Calculated for  $\text{C}_{26}\text{H}_{25}\text{N}_2\text{O}_7\text{S}_2$  ( $[\text{M}+\text{H}]^+$ ) 541.1098, found 541.1095.

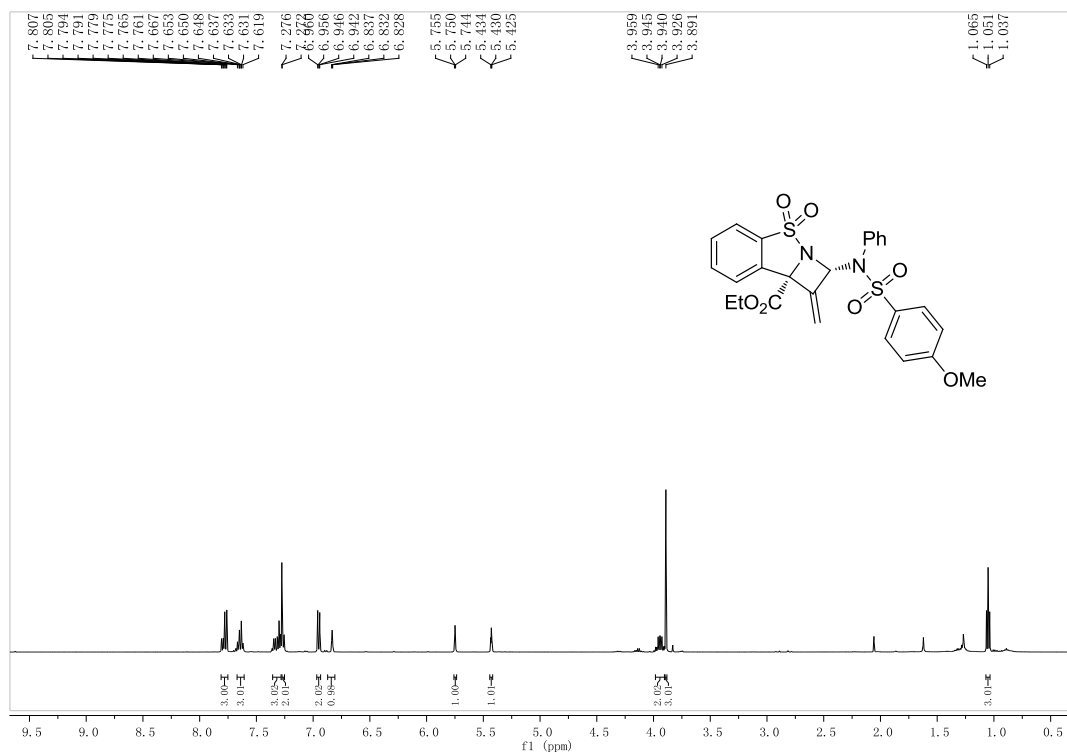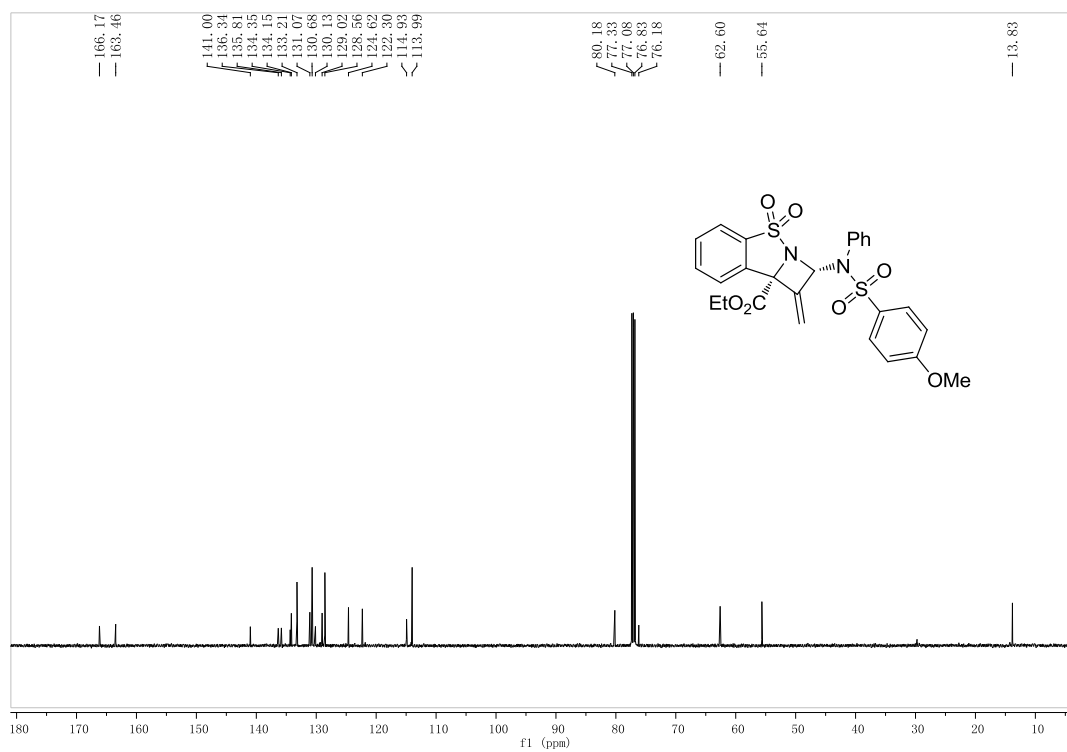

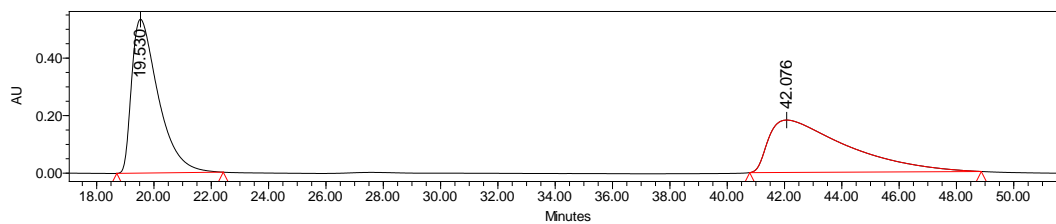

|   | Retention Time | Area     | % Area | Height | % Height |
|---|----------------|----------|--------|--------|----------|
| 1 | 19.530         | 34792332 | 49.52  | 535414 | 74.43    |
| 2 | 42.076         | 35467783 | 50.48  | 183961 | 25.57    |

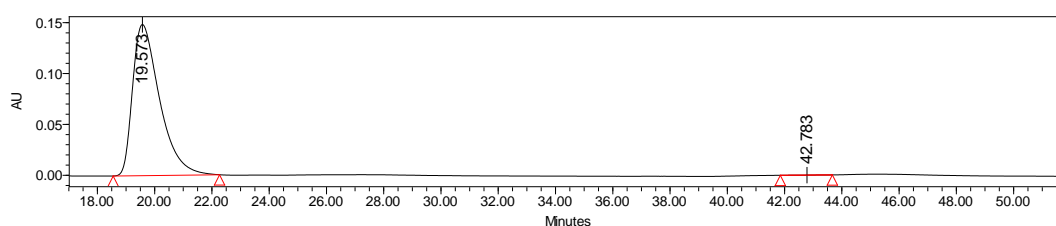

|   | Retention Time | Area    | % Area | Height | % Height |
|---|----------------|---------|--------|--------|----------|
| 1 | 19.573         | 9727954 | 99.99  | 148523 | 99.98    |
| 2 | 42.783         | 1149    | 0.01   | -28    | 0.02     |

Ethyl 1-methylene-2-((N-phenyl-4-(trifluoromethyl)phenyl)sulfonamido)-1,2-dihydro-8bH-azeto[1,2-b]benzo[d]isothiazole-8b-carboxylate 4,4-dioxide (**3ia**)

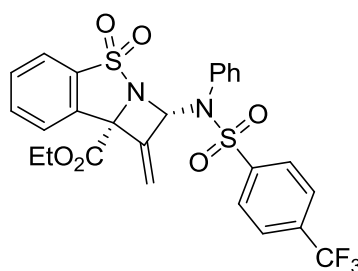

Reaction time: 4 hours. Purified by chromatography on silica gel, eluting with ethyl acetate/petroleum ether 1:3 (v/v), Rf: 0.5; light yellow solid, 66% yield, m.p. 158-160 °C,  $[\alpha]_D^{15} = -13.6$  (c = 1.0 in CH<sub>2</sub>Cl<sub>2</sub>), 99% ee [Lux 5u Cellulose-2 column (25 cm × 0.46 cm ID), n-hexane/*i*-PrOH = 80/20, 0.7 mL/min, 254 nm;  $t_{major} = 14.3$  min,  $t_{minor} = 17.1$  min]; <sup>1</sup>H NMR (500 MHz, CDCl<sub>3</sub>): δ 7.99 (d, *J* = 8.0 Hz, 2H), 7.81 (dd, *J* = 6.5, 1.0 Hz, 1H), 7.77 (d, *J* = 8.5 Hz, 2H), 7.62-7.70 (m, 3H), 7.36-7.41 (m, 1H), 7.33 (t, *J* = 7.5 Hz, 2H), 7.27 (d, *J* = 2.5 Hz, 1H), 7.25 (d, *J* = 1.5 Hz, 1H), 6.81 (t, *J* = 2.5 Hz,

1H), 5.79 (t,  $J = 2.5$  Hz, 1H), 5.45 (t,  $J = 2.5$  Hz, 1H), 3.92–4.00 (m, 2H), 1.06 (t,  $J = 7.0$  Hz, 3H).  $^{13}\text{C}$  NMR (125 MHz,  $\text{CDCl}_3$ ):  $\delta$  166.0, 142.0, 140.4, 136.2, 135.6, 134.9 (q,  $J = 32.5$  Hz), 134.3, 133.8, 132.9, 131.2, 129.4, 129.0, 128.8, 126.0 (q,  $J = 3.8$  Hz), 124.6, 124.4, 122.2 (q,  $J = 15.0$  Hz), 115.2, 79.9, 76.2, 62.7, 13.8. HRMS  $m/z$  (ESI $^+$ ): Calculated for  $\text{C}_{26}\text{H}_{22}\text{F}_3\text{N}_2\text{O}_6\text{S}_2$  ( $[\text{M}+\text{H}]^+$ ) 579.0866, found 579.0863.

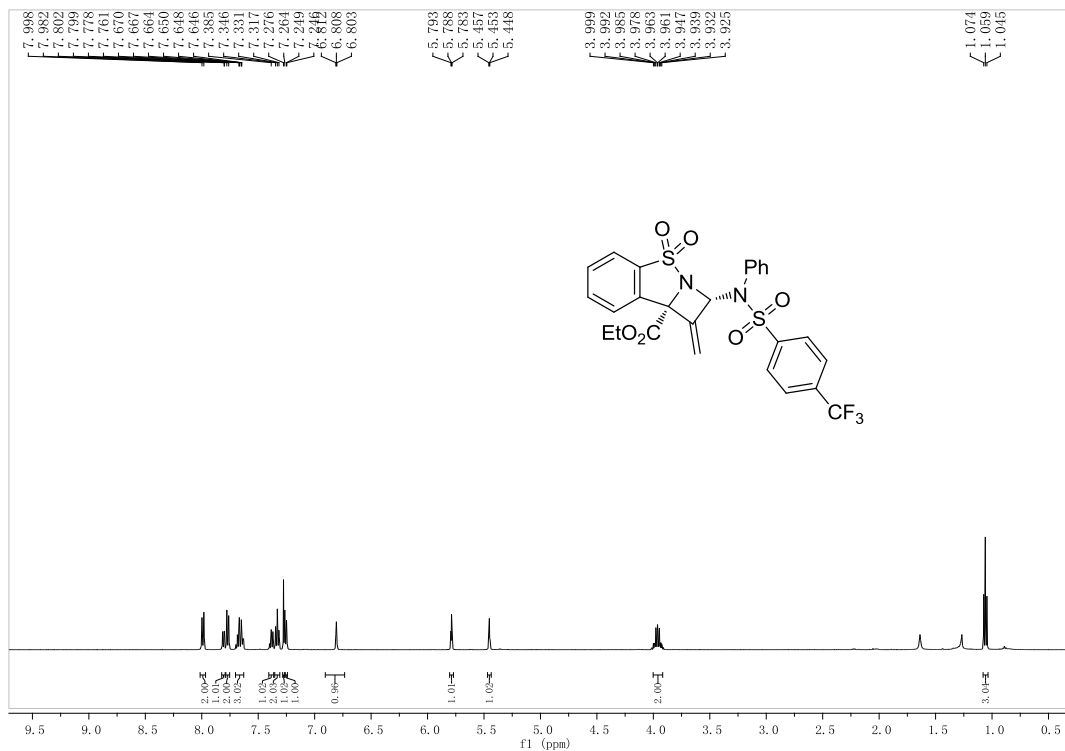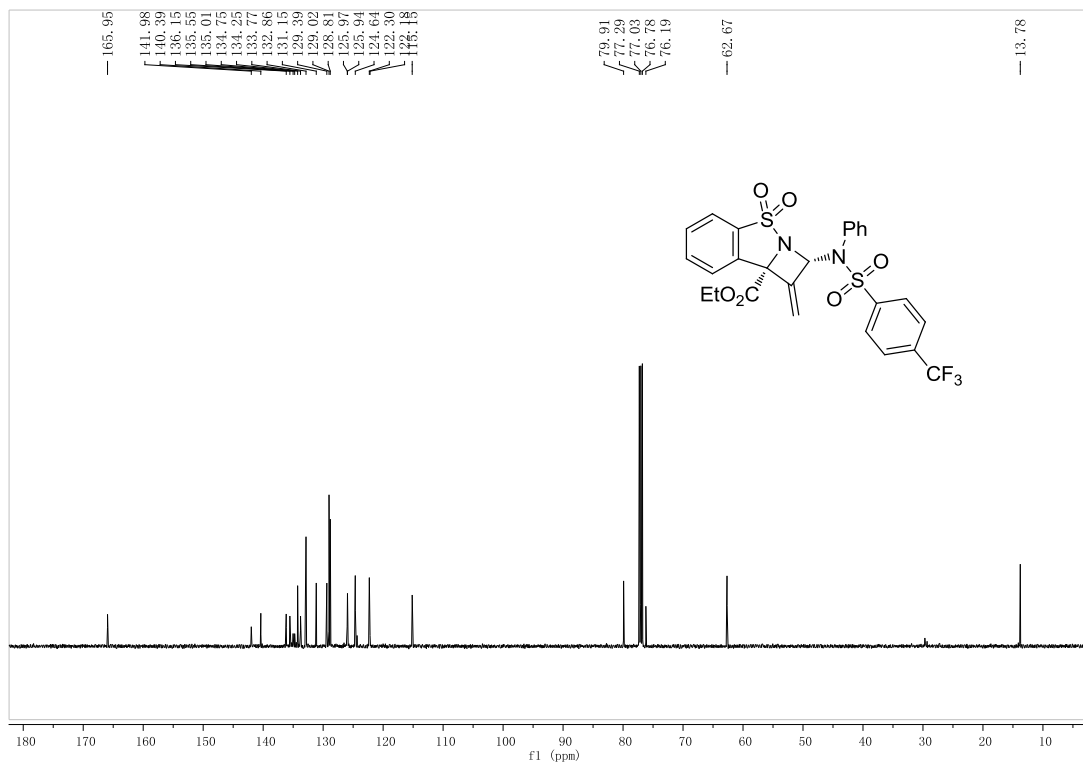

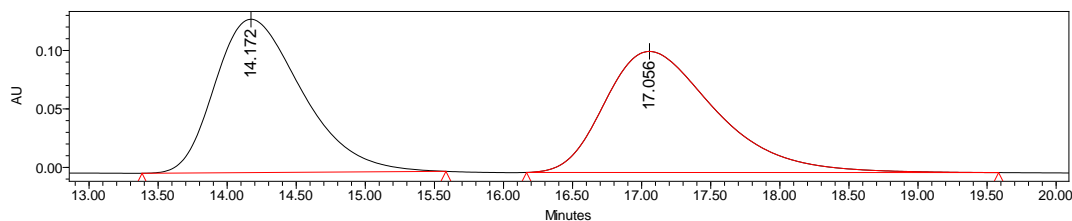

|   | Retention Time | Area    | % Area | Height | % Height |
|---|----------------|---------|--------|--------|----------|
| 1 | 14.172         | 5745164 | 49.75  | 131137 | 55.88    |
| 2 | 17.056         | 5803213 | 50.25  | 103544 | 44.12    |

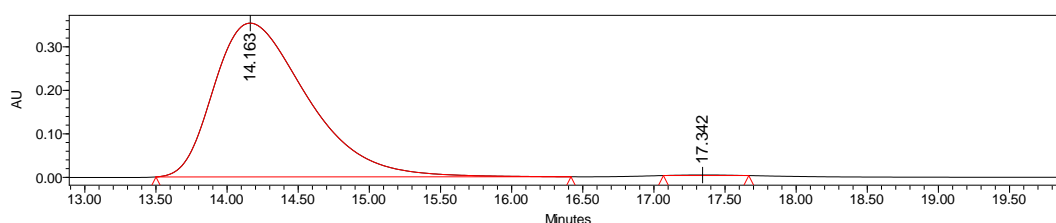

|   | Retention Time | Area     | % Area | Height | % Height |
|---|----------------|----------|--------|--------|----------|
| 1 | 14.163         | 15632079 | 99.91  | 350944 | 99.80    |
| 2 | 17.342         | 14029    | 0.09   | 709    | 0.20     |

Ethyl 1-methylene-2-(N-phenylnaphthalene-2-sulfonamido)-1,2-dihydro-8bH-azeto[1,2-b]benzo[d]isothiazole-8b-carboxylate 4,4-dioxide (**3ja**)

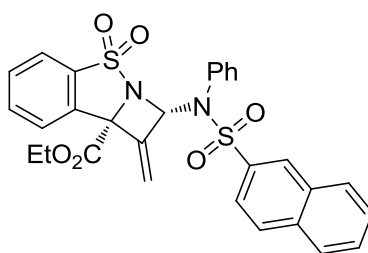

Reaction time: 4 hours. Purified by chromatography on silica gel, eluting with ethyl acetate/petroleum ether 1:3 (v/v), R<sub>f</sub>: 0.3; light yellow solid, 80% yield, m.p. 146-148 °C [ $\alpha$ ]<sub>D</sub><sup>15</sup> = -1.8 (c = 1.0 in CH<sub>2</sub>Cl<sub>2</sub>), 94% ee [Lux 5u Cellulose-2 column (25 cm × 0.46 cm ID), n-hexane/*i*-PrOH = 80/20, 0.7 mL/min, 254 nm;  $t_{\text{major}}$  = 50.9 min,  $t_{\text{minor}}$  = 59.0 min]; <sup>1</sup>H NMR (500 MHz, CDCl<sub>3</sub>):  $\delta$  8.47 (d,  $J$  = 1.5 Hz, 1H), 7.91-7.97 (m, 3H), 7.85 (dd,  $J$  = 9.0, 2.0 Hz, 1H), 7.81 (dd,  $J$  = 8.5, 1.5 Hz, 1H), 7.57-7.68 (m, 5H), 7.31-7.36 (m, 1H), 7.22-7.27 (m, 4H), 6.93 (t,  $J$  = 2.5 Hz, 1H), 5.78 (t,  $J$  = 2.5 Hz, 1H),



5.47 (t,  $J = 2.5$  Hz, 1H), 3.86-3.95 (m, 2H), 1.01 (t,  $J = 7.5$  Hz, 3H).  $^{13}\text{C}$  NMR (125 MHz,  $\text{CDCl}_3$ ):  $\delta$  166.0, 140.8, 136.2, 135.7, 135.4, 135.1, 134.1, 134.0, 133.1, 132.1, 131.0, 130.1, 129.6, 129.1, 129.0, 128.9, 128.5, 127.8, 127.3, 124.5, 123.3, 122.2, 115.0, 80.1, 76.2, 62.5, 13.7. HRMS  $m/z$  (ESI $^+$ ): Calculated for  $\text{C}_{29}\text{H}_{25}\text{N}_2\text{O}_6\text{S}_2$  ( $[\text{M}+\text{H}]^+$ ) 561.1149, found 561.1143.

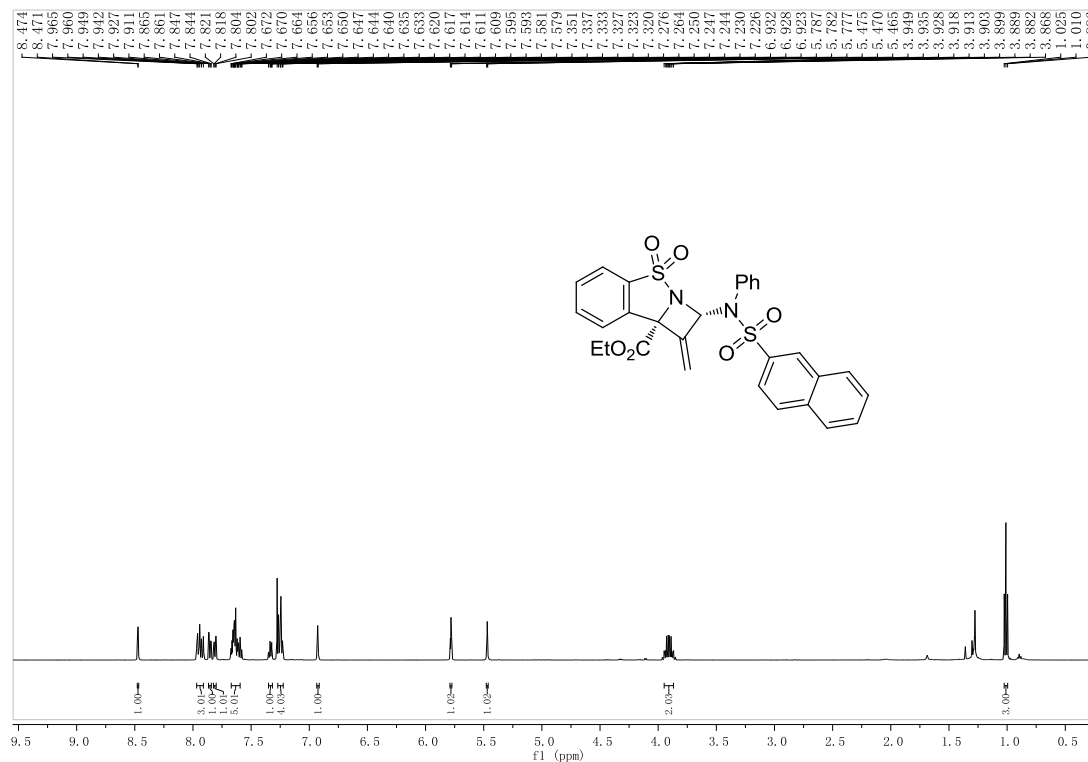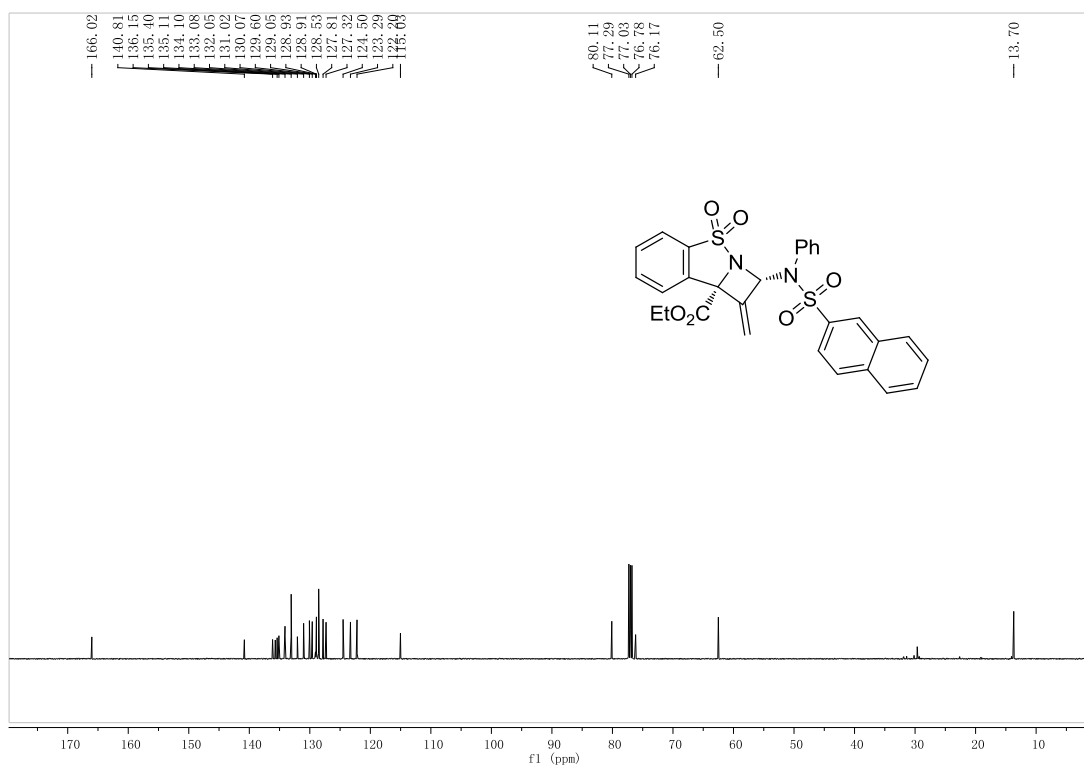

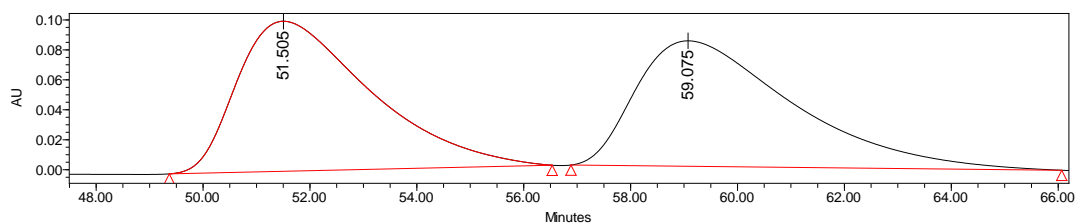

|   | Retention Time | Area     | % Area | Height | % Height |
|---|----------------|----------|--------|--------|----------|
| 1 | 51.505         | 17369264 | 50.43  | 100154 | 54.47    |
| 2 | 59.075         | 17069954 | 49.57  | 83724  | 45.53    |

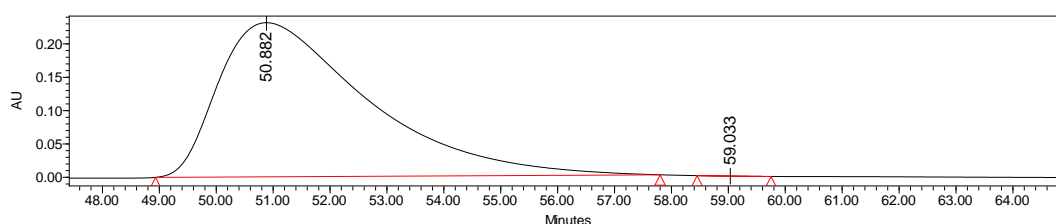

|   | Retention Time | Area     | % Area | Height | % Height |
|---|----------------|----------|--------|--------|----------|
| 1 | 50.882         | 42452720 | 99.93  | 231722 | 99.84    |
| 2 | 59.033         | 29180    | 0.07   | -360   | 0.16     |

Ethyl 2-((4-chloro-N-phenylphenyl)sulfonamido)-1-methylene-1,2-dihydro-8bH-azeto[1,2-b]benzo[d]isothiazole-8b-carboxylate 4,4-dioxide (**3ka**)

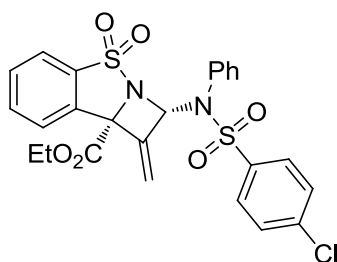

Reaction time: 3 hours. Purified by chromatography on silica gel, eluting with ethyl acetate/petroleum ether 1:3 (v/v), Rf: 0.5; light yellow solid, 72% yield, m.p. 116-118 °C,  $[\alpha]_D^{15} = 8.0$  (c = 1.0 in CH<sub>2</sub>Cl<sub>2</sub>), 98% ee [Lux 5u Cellulose-2 column (25 cm × 0.46 cm ID), n-hexane/i-PrOH = 80/20, 0.7 mL/min, 254 nm;  $t_{major} = 22.1$  min,  $t_{minor} = 25.5$  min]; <sup>1</sup>H NMR (500 MHz, CDCl<sub>3</sub>): δ 7.76-7.80 (m, 3H), 7.61-7.69 (m, 3H), 7.45-7.48 (m, 2H), 7.34-7.39 (m, 1H), 7.32 (t, J = 7.0 Hz, 2H), 7.24-7.27 (m, 2H),

6.79 (t,  $J = 2.5$  Hz, 1H), 5.77 (t,  $J = 2.5$  Hz, 1H), 5.43 (t,  $J = 2.5$  Hz, 1H), 3.91-3.99 (m, 2H), 1.06 (t,  $J = 7.0$  Hz, 3H).  $^{13}\text{C}$  NMR (125 MHz,  $\text{CDCl}_3$ ):  $\delta$  166.0, 140.5, 139.9, 136.9, 136.1, 135.5, 134.2, 133.9, 132.9, 131.1, 129.9, 129.2, 129.1, 128.7, 124.6, 122.2, 115.1, 80.0, 76.2, 62.6, 13.7. HRMS  $m/z$  (ESI $^+$ ): Calculated for  $\text{C}_{25}\text{H}_{22}\text{ClN}_2\text{O}_6\text{S}_2$  ( $[\text{M}+\text{H}]^+$ ) 545.0602, found 545.0605.

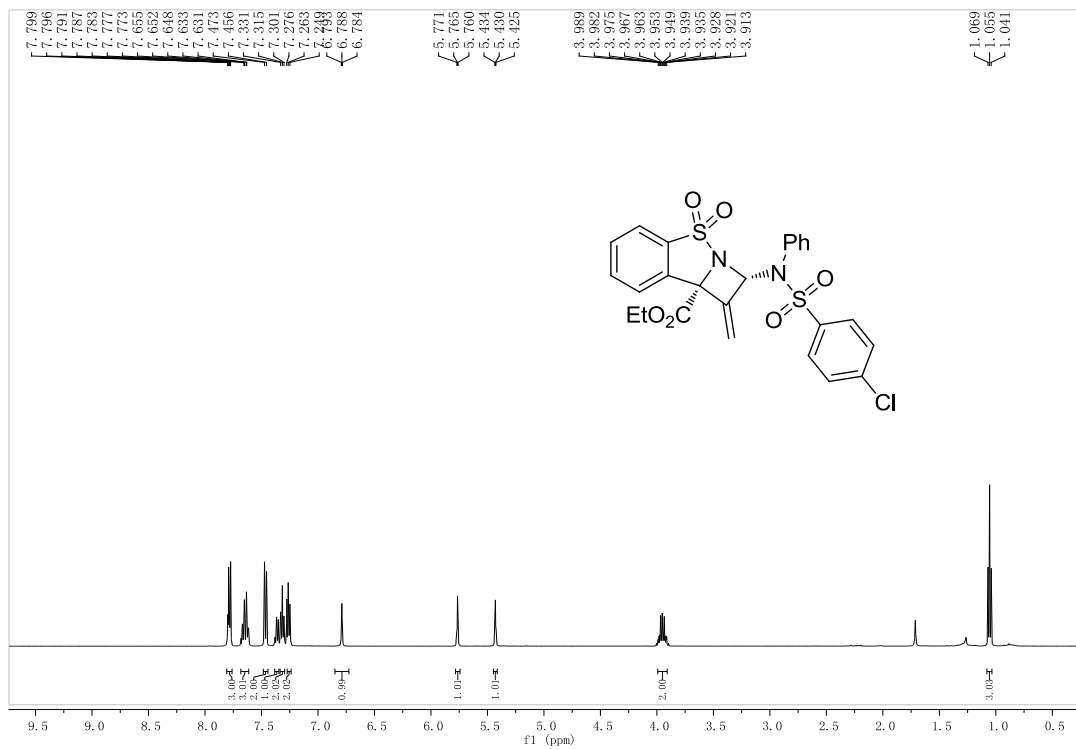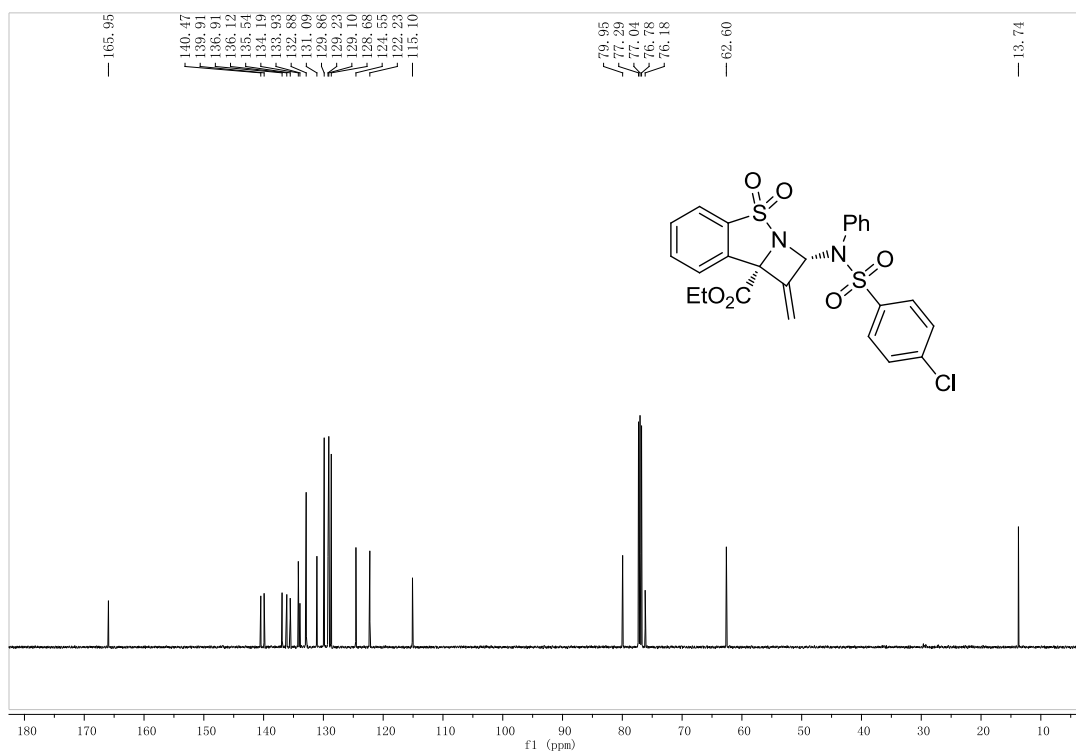

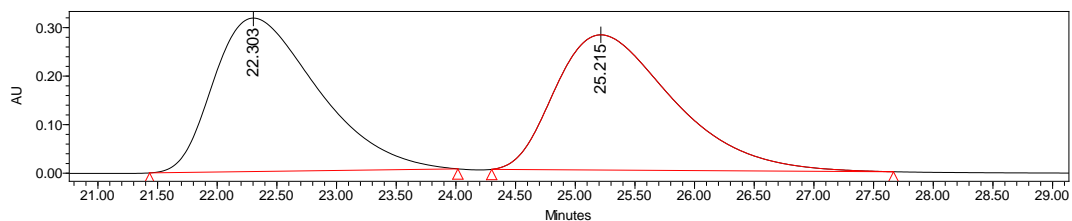

|   | Retention Time | Area     | % Area | Height | % Height |
|---|----------------|----------|--------|--------|----------|
| 1 | 22.303         | 19194862 | 49.95  | 316303 | 53.17    |
| 2 | 25.215         | 19229797 | 50.05  | 278555 | 46.83    |

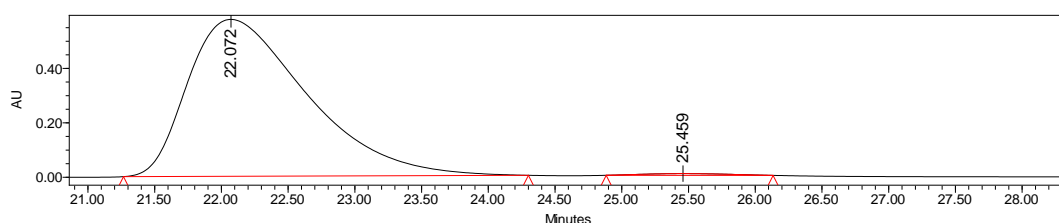

|   | Retention Time | Area     | % Area | Height | % Height |
|---|----------------|----------|--------|--------|----------|
| 1 | 22.072         | 35686750 | 99.06  | 576982 | 98.78    |
| 2 | 25.459         | 340350   | 0.94   | 7109   | 1.22     |

Ethyl 2-((4-chloro-N-phenylphenyl)sulfonamido)-7-methoxy-1-methylene-1,2-dihydro-8bH-azeto[1,2-b]benzo[d]isothiazole-8b-carboxylate 4,4-dioxide (**3ke**)

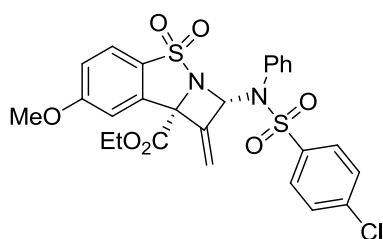

Reaction time: 3 hours. Purified by chromatography on silica gel, eluting with ethyl acetate/petroleum ether 1:3 (v/v), Rf: 0.3; white solid, 75% yield, m.p. 141-143 °C,  $[\alpha]_D^{15} = 12.9$  (c = 1.0 in CH<sub>2</sub>Cl<sub>2</sub>), 99% ee [Daicel Chiralcel AD-H column (25 cm × 0.46 cm ID), n-hexane/i-PrOH = 80/20, 0.8 mL/min, 254 nm;  $t_{\text{major}} = 62.2$  min,  $t_{\text{minor}} = 29.2$  min]; <sup>1</sup>H NMR (500 MHz, CDCl<sub>3</sub>): δ 7.78 (d, *J* = 8.5 Hz, 2H), 7.67 (d, *J* = 9.0 Hz, 1H), 7.45 (d, *J* = 9.0 Hz, 2H), 7.34-7.38 (m, 1H), 7.30 (t, *J* = 7.5 Hz, 2H), 7.23-7.25 (m, 2H), 7.11 (dd, *J* = 8.5, 2.0 Hz, 1H), 6.99 (d, *J* = 2.5 Hz, 1H), 6.79 (t, *J* = 2.5

Hz, 1H), 5.75 (t,  $J = 2.5$  Hz, 1H), 5.43 (t,  $J = 2.5$  Hz, 1H), 3.91-3.99 (m, 2H), 3.86 (s, 3H), 1.06 (t,  $J = 7.0$  Hz, 3H).  $^{13}\text{C}$  NMR (125 MHz,  $\text{CDCl}_3$ ):  $\delta$  166.0, 164.4, 140.5, 139.8, 138.7, 136.9, 133.9, 132.9, 129.9, 129.2, 129.0, 128.6, 127.5, 123.5, 117.9, 115.0, 108.2, 79.9, 75.6, 62.5, 56.0, 13.7. HRMS  $m/z$  (ESI $^+$ ): Calculated for  $\text{C}_{25}\text{H}_{24}\text{ClN}_2\text{O}_7\text{S}_2$  ( $[\text{M}+\text{H}]^+$ ) 575.0708, found 575.0710.

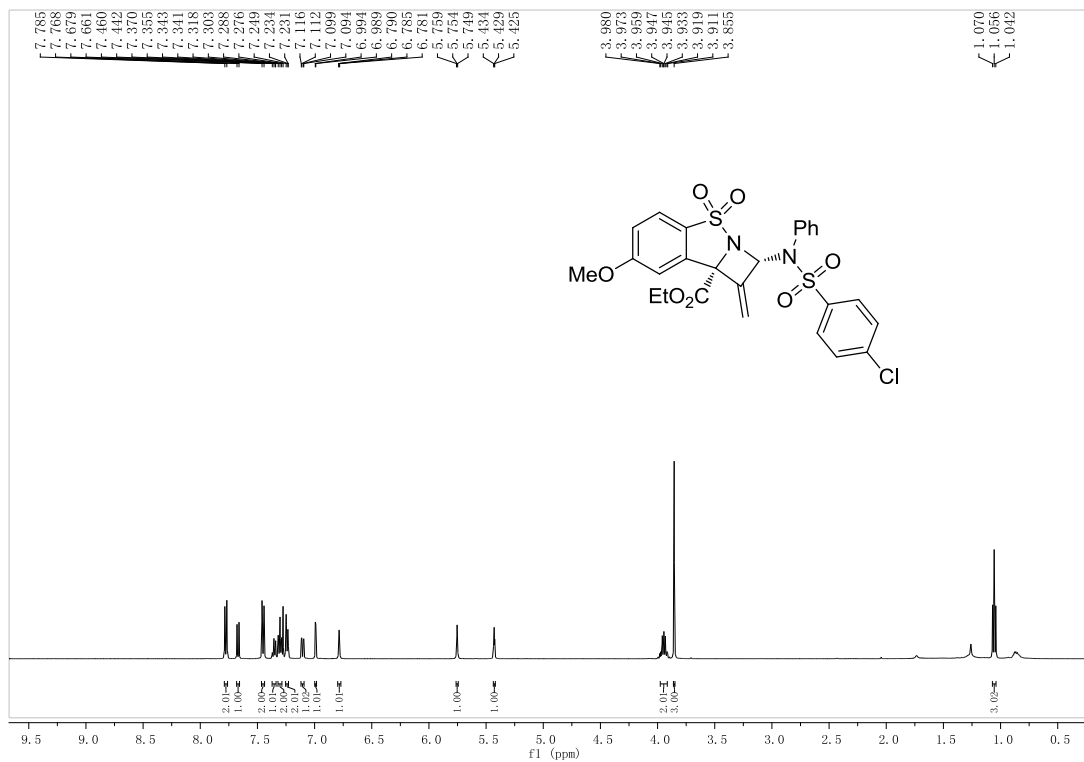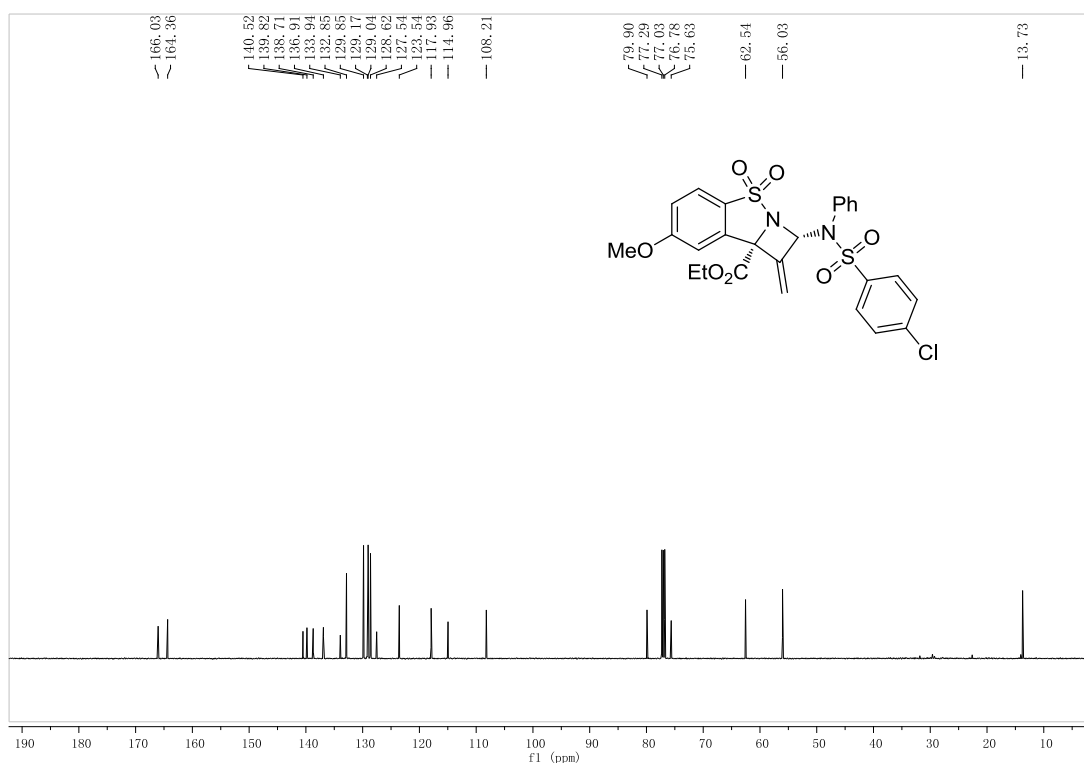

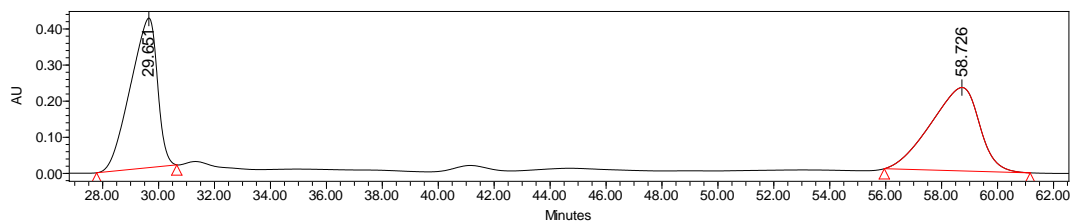

|   | Retention Time | Area     | % Area | Height | % Height |
|---|----------------|----------|--------|--------|----------|
| 1 | 29.651         | 27703284 | 49.73  | 414022 | 64.19    |
| 2 | 58.726         | 28007489 | 50.27  | 230939 | 35.81    |

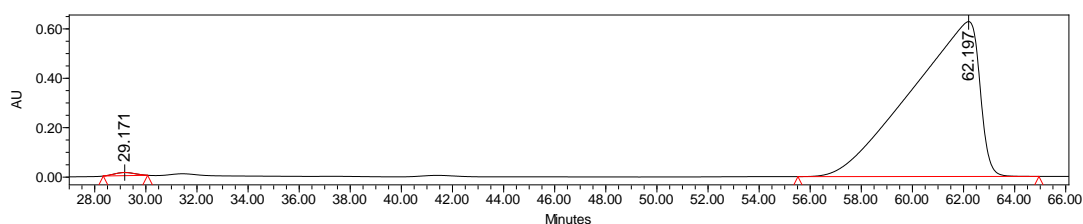

|   | Retention Time | Area      | % Area | Height | % Height |
|---|----------------|-----------|--------|--------|----------|
| 1 | 29.171         | 594335    | 0.51   | 11549  | 1.81     |
| 2 | 62.197         | 116129370 | 99.49  | 625776 | 98.19    |

Ethyl 7-chloro-2-((4-chloro-N-phenylphenyl)sulfonamido)-1-methylene-1,2-dihydro-8bH-azeto[1,2-b]benzo[d]isothiazole-8b-carboxylate 4,4-dioxide (**3kh**)

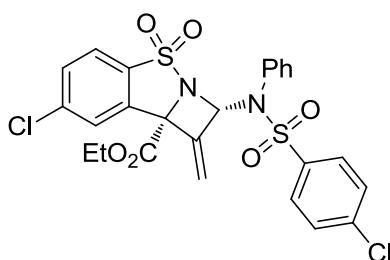

Reaction time: 4 hours. Purified by chromatography on silica gel, eluting with ethyl acetate/petroleum ether 1:3 (v/v), Rf: 0.4; white solid, 90% yield, m.p. 138-140 °C,  $[\alpha]_D^{15} = 12.9$  (c = 1.0 in  $\text{CH}_2\text{Cl}_2$ ), 98% ee [Daicel Chiralcel AD-H column (25 cm × 0.46 cm ID), n-hexane/*i*-PrOH = 80/20, 0.8 mL/min, 254 nm;  $t_{\text{major}} = 38.4$  min,  $t_{\text{minor}} = 19.8$  min];  $^1\text{H}$  NMR (500 MHz,  $\text{CDCl}_3$ ):  $\delta$  7.74-7.78 (m, 2H), 7.71-7.74 (m, 1H), 7.59 (dd,  $J = 7.0, 2.0$  Hz, 2H), 7.44-7.47 (m, 2H), 7.35-7.39 (m, 1H), 7.31 (t,  $J = 7.5$  Hz,

2H), 7.22-7.25 (m, 2H), 6.80 (t,  $J = 2.5$  Hz, 1H), 5.78 (t,  $J = 2.5$  Hz, 1H), 5.47 (t,  $J = 2.5$  Hz, 1H), 3.92-4.01 (m, 2H), 1.06 (t,  $J = 7.0$  Hz, 3H).  $^{13}\text{C}$  NMR (125 MHz,  $\text{CDCl}_3$ ):  $\delta$  165.5, 140.7, 139.9, 138.1, 136.8, 134.1, 133.8, 132.8, 131.6, 129.8, 129.3, 129.1, 128.7, 124.8, 123.4, 115.6, 80.1, 75.5, 62.8, 13.7. HRMS  $m/z$  (ESI $^+$ ): Calculated for  $\text{C}_{25}\text{H}_{21}\text{Cl}_2\text{N}_2\text{O}_6\text{S}_2$  ( $[\text{M}+\text{H}]^+$ ) 579.0213, found 579.0236.

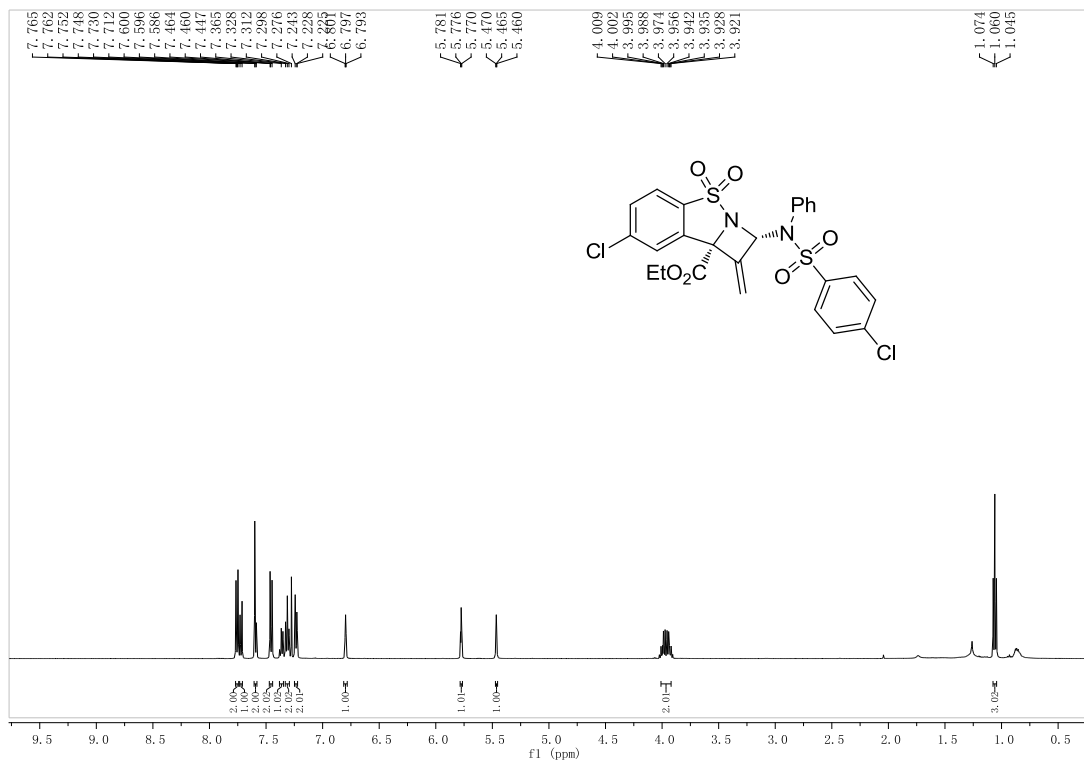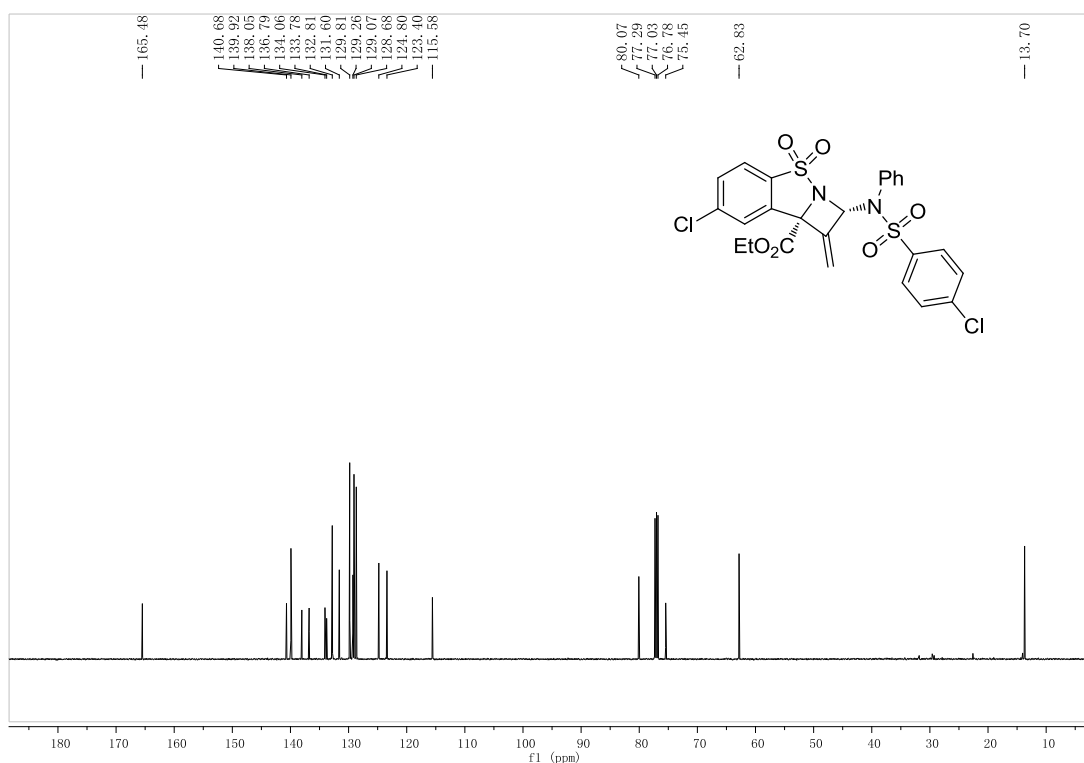

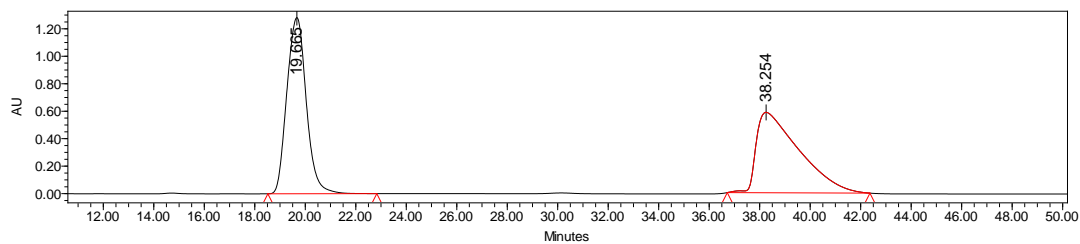

|   | Retention Time | Area     | % Area | Height  | % Height |
|---|----------------|----------|--------|---------|----------|
| 1 | 19.665         | 68372194 | 49.19  | 1281806 | 68.50    |
| 2 | 38.254         | 70613166 | 50.81  | 589540  | 31.50    |

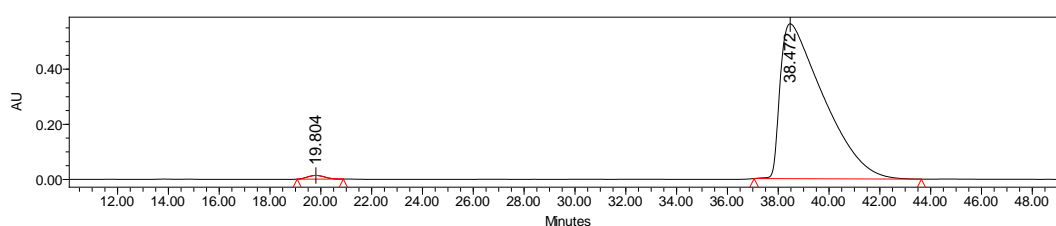

|   | Retention Time | Area     | % Area | Height | % Height |
|---|----------------|----------|--------|--------|----------|
| 1 | 19.804         | 625615   | 0.93   | 13269  | 2.31     |
| 2 | 38.472         | 66477193 | 99.07  | 562077 | 97.69    |

Ethyl 7-methoxy-2-((4-methyl-N-(p-tolyl)sulfonamido)-1-methylene-1,2-dihydro-8bH-azeto[1,2-b]benzo[d]isothiazole-8b-carboxylate 4,4-dioxide (**3be**)

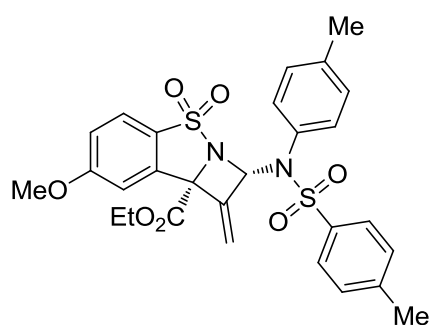

Reaction time: 3 hours. Purified by chromatography on silica gel, eluting with ethyl acetate/petroleum ether 1:3 (v/v), R<sub>f</sub>: 0.2; light yellow solid, 85% yield, m.p. 195-197 °C, [α]<sub>D</sub><sup>15</sup> = 20.7 (c = 1.0 in CH<sub>2</sub>Cl<sub>2</sub>), 98% ee [Daicel Chiralcel AD-H column (25 cm × 0.46 cm ID), n-hexane/*i*-PrOH = 80/20, 0.7 mL/min, 254 nm; t<sub>major</sub> = 98.6 min, t<sub>minor</sub> = 43.7 min]; <sup>1</sup>H NMR (500 MHz, CDCl<sub>3</sub>): δ 7.72 (d, *J* = 8.5 Hz, 2H), 7.67 (d, *J* = 8.5 Hz, 1H), 7.28 (s, 2H), 7.05-7.11 (m, 5H), 6.99 (d, *J* = 2.5 Hz, 1H), 6.81 (t, *J* = 2.0 Hz,



1H), 5.74 (t,  $J = 2.5$  Hz, 1H), 5.42 (t,  $J = 2.5$  Hz, 1H), 3.89-3.97 (m, 2H), 3.86 (s, 3H), 2.43 (s, 3H), 2.32 (s, 3H), 1.04 (t,  $J = 7.0$  Hz, 3H).  $^{13}\text{C}$  NMR (125 MHz,  $\text{CDCl}_3$ ):  $\delta$  166.2, 164.3, 144.0, 141.0, 138.9, 138.8, 135.7, 132.8, 131.4, 129.3, 129.1, 128.4, 127.8, 123.5, 117.9, 114.7, 108.2, 80.1, 75.6, 62.4, 56.0, 21.5, 21.1, 13.6. HRMS  $m/z$  (ESI $^+$ ): Calculated for  $\text{C}_{28}\text{H}_{29}\text{N}_2\text{O}_7\text{S}_2$  ( $[\text{M}+\text{H}]^+$ ) 569.1411, found 569.1415.

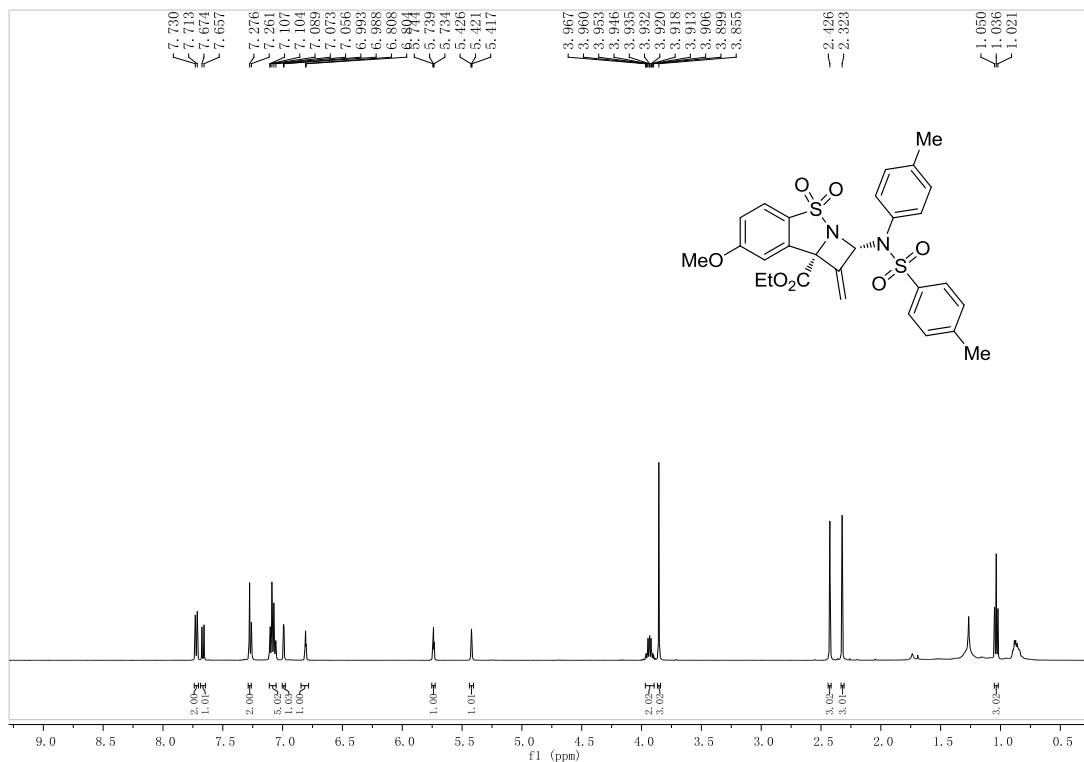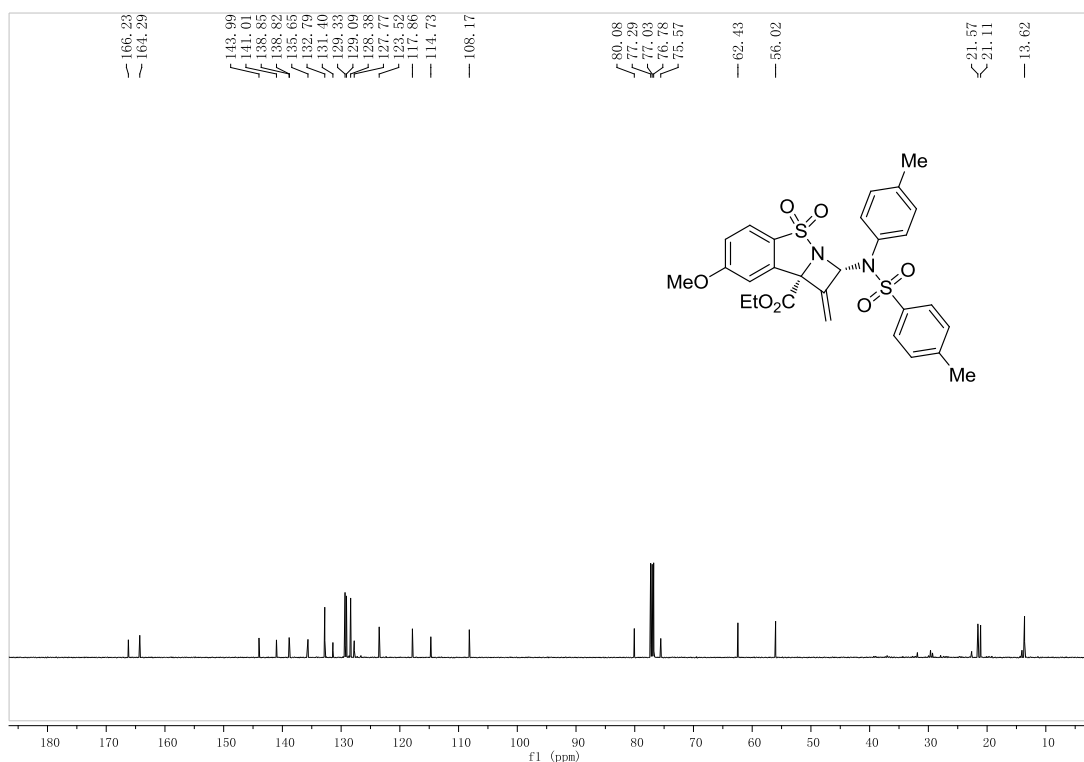

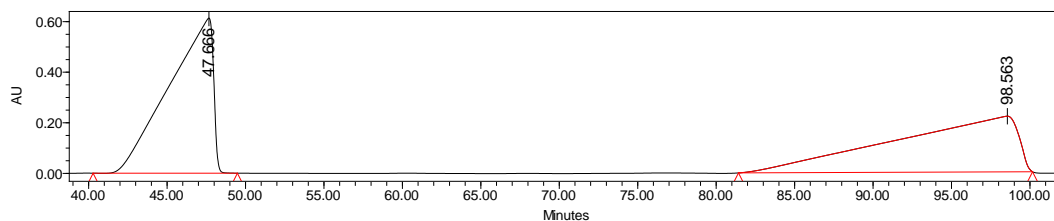

|   | Retention Time | Area      | % Area | Height | % Height |
|---|----------------|-----------|--------|--------|----------|
| 1 | 47.666         | 119708434 | 49.58  | 613503 | 73.59    |
| 2 | 98.563         | 121713702 | 50.42  | 220185 | 26.41    |

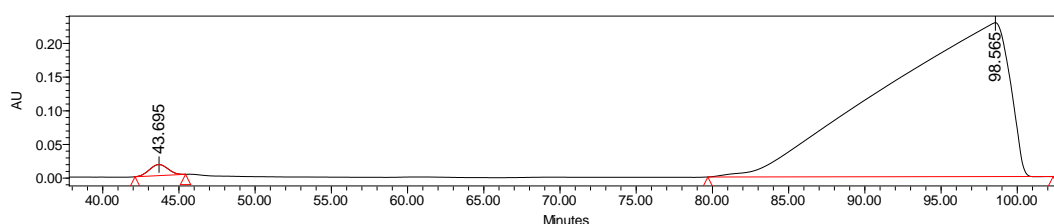

|   | Retention Time | Area      | % Area | Height | % Height |
|---|----------------|-----------|--------|--------|----------|
| 1 | 43.695         | 1367011   | 1.03   | 16295  | 6.64     |
| 2 | 98.565         | 131548258 | 98.97  | 228931 | 93.36    |

Ethyl 1-ethylidene-2-(4-methyl-N-phenylphenylsulfonamido)-2,8b-dihydro-1H-azeto[1,2-b]benzo[d]isothiazole-8b-carboxylate 4,4-dioxide (**3la**)

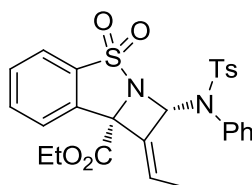

Reaction time: 3.5 hours. Purified by chromatography on silica gel, eluting with ethyl acetate/petroleum ether 1:3 (v/v), Rf: 0.4; yellow oil, 75% yield,  $[\alpha]_D^{25} = -2.0$  (c 1.0, CH<sub>2</sub>Cl<sub>2</sub>), 95% ee [Daicel Chiralcel AD-H column (25 cm × 0.46 cm ID), n-hexane/i-PrOH = 80/20, 0.8 mL/min, 254 nm;  $t_{\text{major}} = 29.4$  min,  $t_{\text{minor}} = 32.5$  min]; <sup>1</sup>H NMR (500 MHz, CDCl<sub>3</sub>) δ 7.77-7.79 (m, 1H), 7.73 (d, *J* = 8.5 Hz, 2H), 7.59-7.66 (m, 2H), 7.56 (dd, *J* = 7.0, 1.5 Hz, 1H), 7.34-7.37 (m, 1H), 7.27-7.30 (m, 6H), 6.89 (s, 1H), 6.06-6.11 (m, 1H), 3.83-3.94 (m, 2H), 2.45 (s, 3H), 1.89 (dd, *J* = 7.5, 1.5 Hz,

3H), 1.04 (t,  $J = 7.0$  Hz, 3H).  $^{13}\text{C}$  NMR (125 MHz,  $\text{CDCl}_3$ )  $\delta$  166.5, 144.1, 137.2, 135.74, 137.65, 134.0, 132.2, 131.8, 130.8, 129.4, 129.0, 128.5, 128.3, 127.2, 124.2, 122.1, 79.6, 76.0, 62.3, 21.6, 13.74, 13.71. HRMS  $m/z$  (ESI $^+$ ): Calculated for  $\text{C}_{27}\text{H}_{27}\text{N}_2\text{O}_6\text{S}_2$  ( $[\text{M}+\text{H}]^+$ ) 539.1305, found 539.1272.

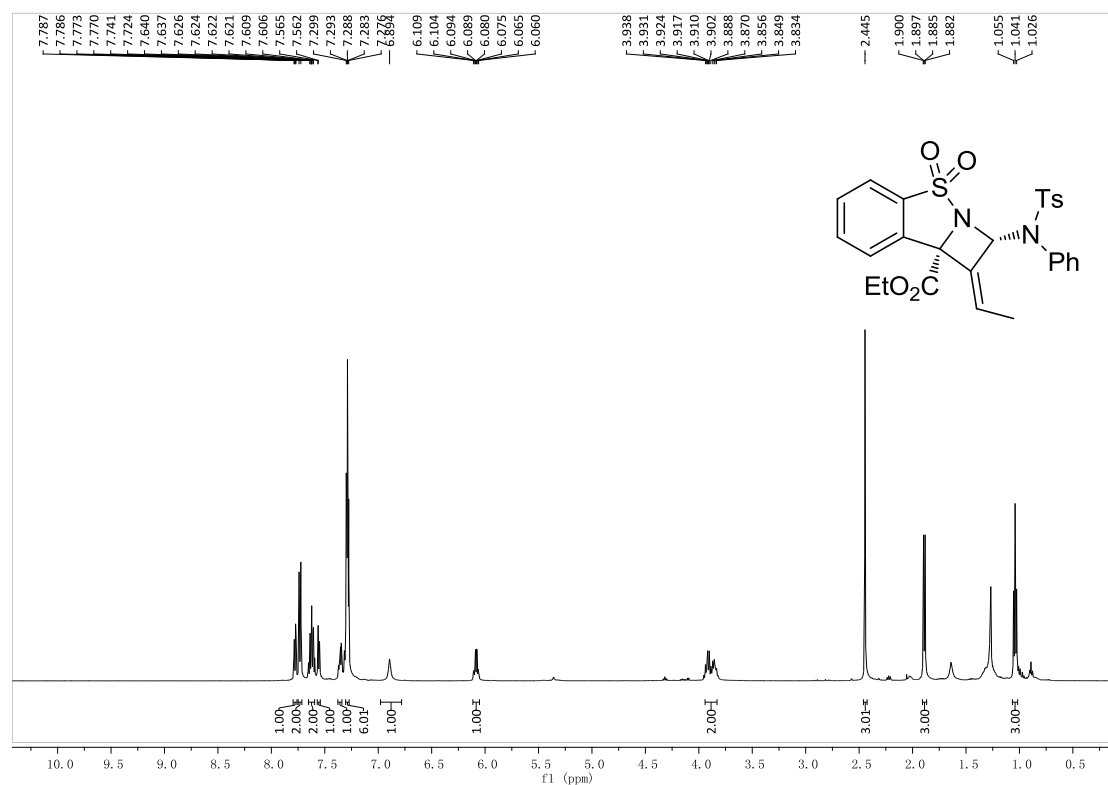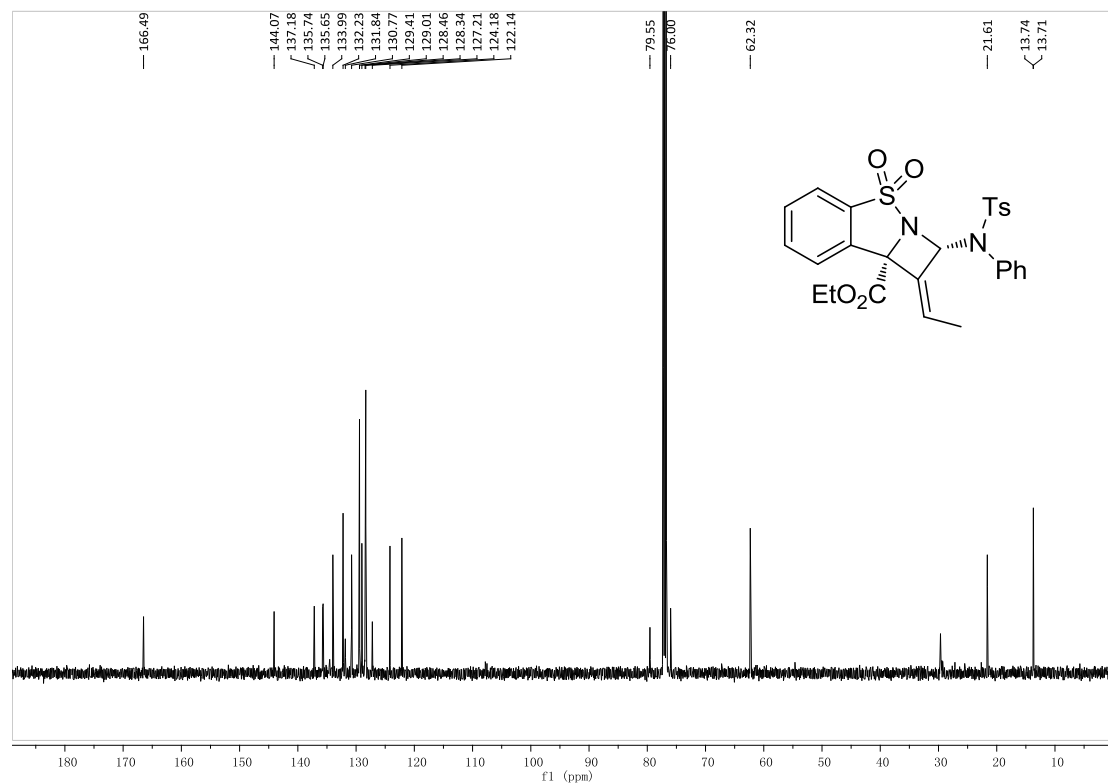

HBB-2-49 CDC13 1114

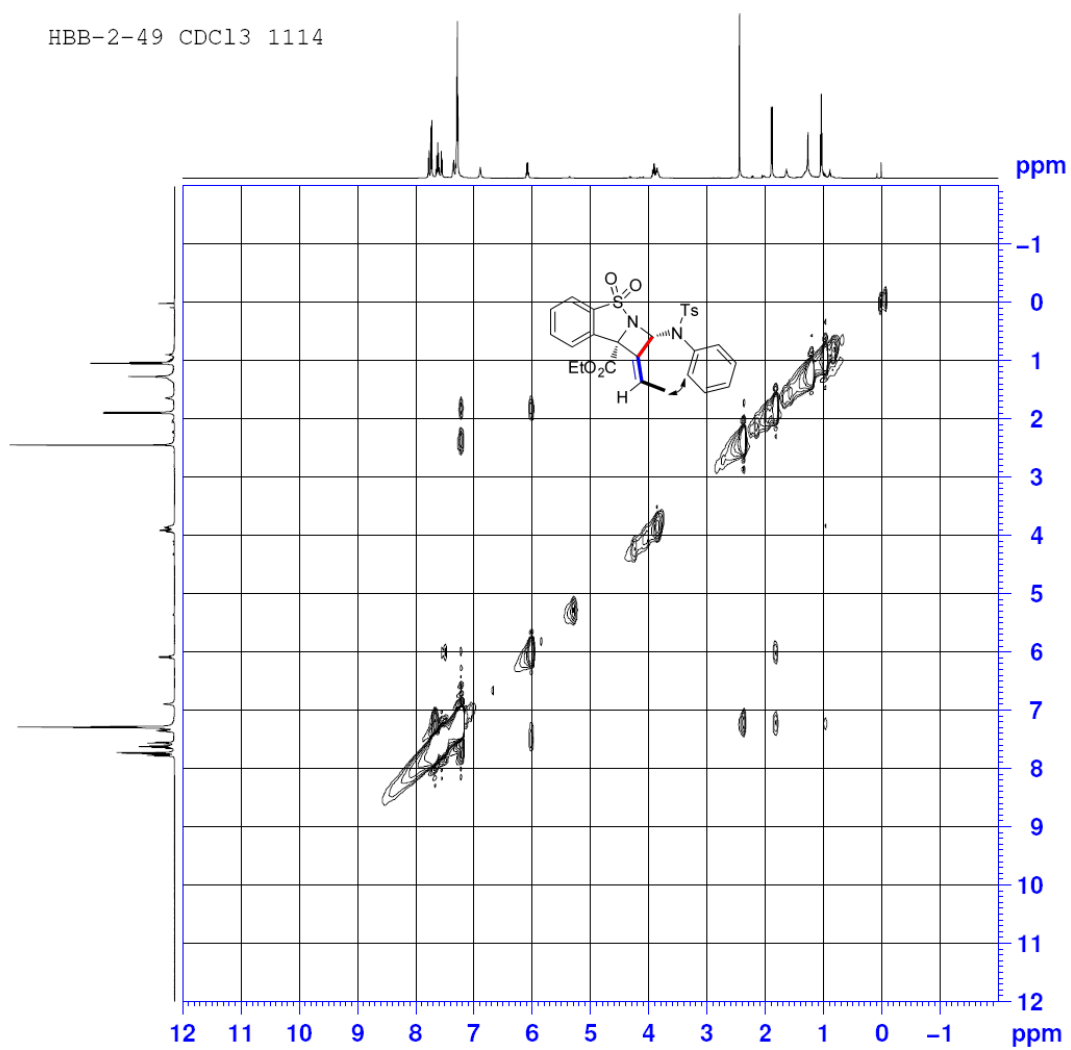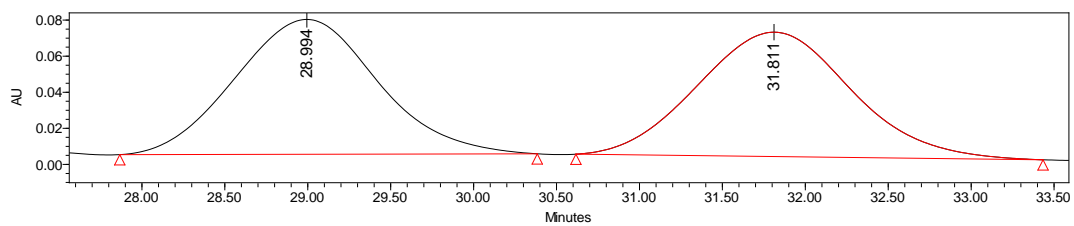

|   | Retention Time | Area    | % Area | Height | % Height |
|---|----------------|---------|--------|--------|----------|
| 1 | 28.994         | 4465057 | 50.16  | 74727  | 52.01    |
| 2 | 31.811         | 4436511 | 49.84  | 68941  | 47.99    |

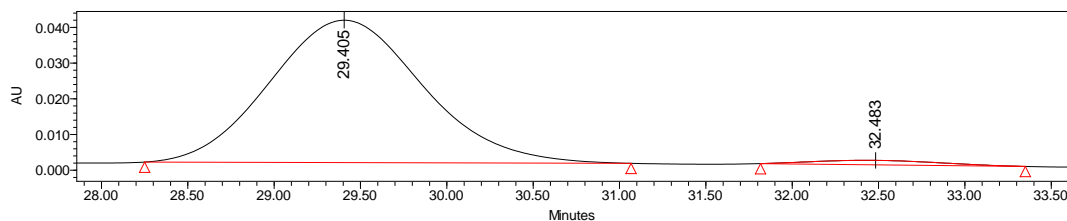

|   | Retention Time | Area    | % Area | Height | % Height |
|---|----------------|---------|--------|--------|----------|
| 1 | 29.405         | 2505096 | 97.43  | 40130  | 96.90    |
| 2 | 32.483         | 66020   | 2.57   | 1284   | 3.10     |

*N*-(Buta-1,2-dien-1-yl)-4-methyl-*N*-phenylbenzenesulfonamide (**II**)

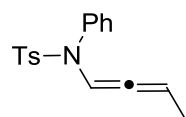

Reaction time: 3.5 hours. Purified by chromatography on silica gel, eluting with ethyl acetate/petroleum ether 1:20 (v/v), Rf: 0.7; yellow oil, 70% yield,  $[\alpha]_D^{25} = -4.3$  ( $c$  1.0,  $\text{CH}_2\text{Cl}_2$ ), 68% ee [Daicel Chiralcel AD-H column (25 cm  $\times$  0.46 cm ID), *n*-hexane/*i*-PrOH = 95/5, 0.5 mL/min, 254 nm;  $t_{\text{major}} = 20.7$  min,  $t_{\text{minor}} = 22.0$  min].

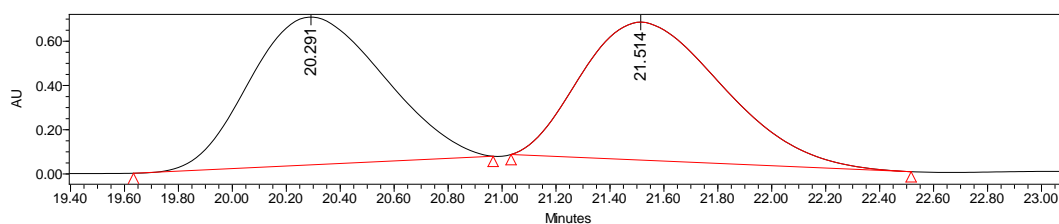

|   | Retention Time | Area     | % Area | Height | % Height |
|---|----------------|----------|--------|--------|----------|
| 1 | 20.291         | 23028980 | 50.28  | 668171 | 51.71    |
| 2 | 21.514         | 22774677 | 49.72  | 623904 | 48.29    |

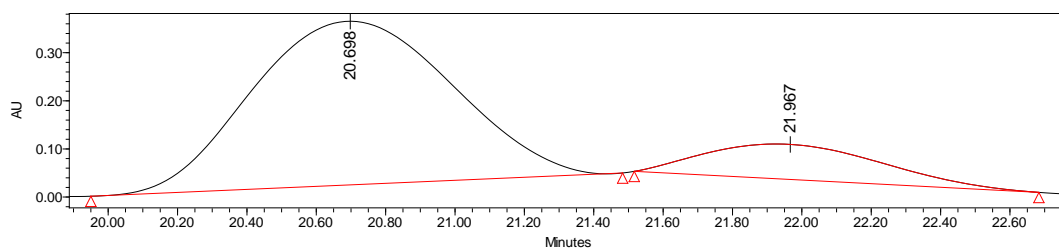

|   | Retention Time | Area     | % Area | Height | % Height |
|---|----------------|----------|--------|--------|----------|
| 1 | 20.698         | 13615837 | 83.93  | 340237 | 82.36    |
| 2 | 21.967         | 2607938  | 16.07  | 72878  | 17.64    |

Ethyl 3-(3-oxoprop-1-en-2-yl)-2,3-dihydrobenzo[d]isothiazole-3-carboxylate 1,1-dioxide (**5a**)

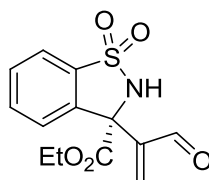

Reaction time: 8 hours. Purified by chromatography on silica gel, eluting with ethyl acetate/petroleum ether 1:2 (v/v), Rf: 0.5; light yellow oil, 62% yield,  $[\alpha]_D^{25} = -210.6$  (c = 1.0 in  $\text{CH}_2\text{Cl}_2$ ), 94% ee [Lux 5u Cellulose-2 column (25 cm  $\times$  0.46 cm ID), n-hexane/i-PrOH = 80/20, 0.8 mL/min, 254 nm;  $t_{\text{major}} = 34.8$  min,  $t_{\text{minor}} = 40.5$  min];  $^1\text{H}$  NMR (500 MHz,  $\text{CDCl}_3$ ):  $\delta$  9.63 (s, 1H), 7.86-7.89 (m, 1H), 7.69-7.74 (m, 2H), 7.60-7.63 (m, 1H), 7.28 (s, 1H), 6.29 (s, 1H), 5.99 (s, 1H), 4.31-4.36 (m, 2H), 1.31 (t,  $J = 7.0$  Hz, 3H).  $^{13}\text{C}$  NMR (125 MHz,  $\text{CDCl}_3$ ):  $\delta$  191.6, 168.1, 148.4, 137.2, 136.1, 134.9, 133.4, 131.2, 125.8, 122.0, 66.3, 64.0, 13.9. HRMS  $m/z$  (ESI+): Calculated for  $\text{C}_{13}\text{H}_{14}\text{NO}_5\text{S}$  ( $[\text{M}+\text{H}]^+$ ) 296.0587, found 296.0582.

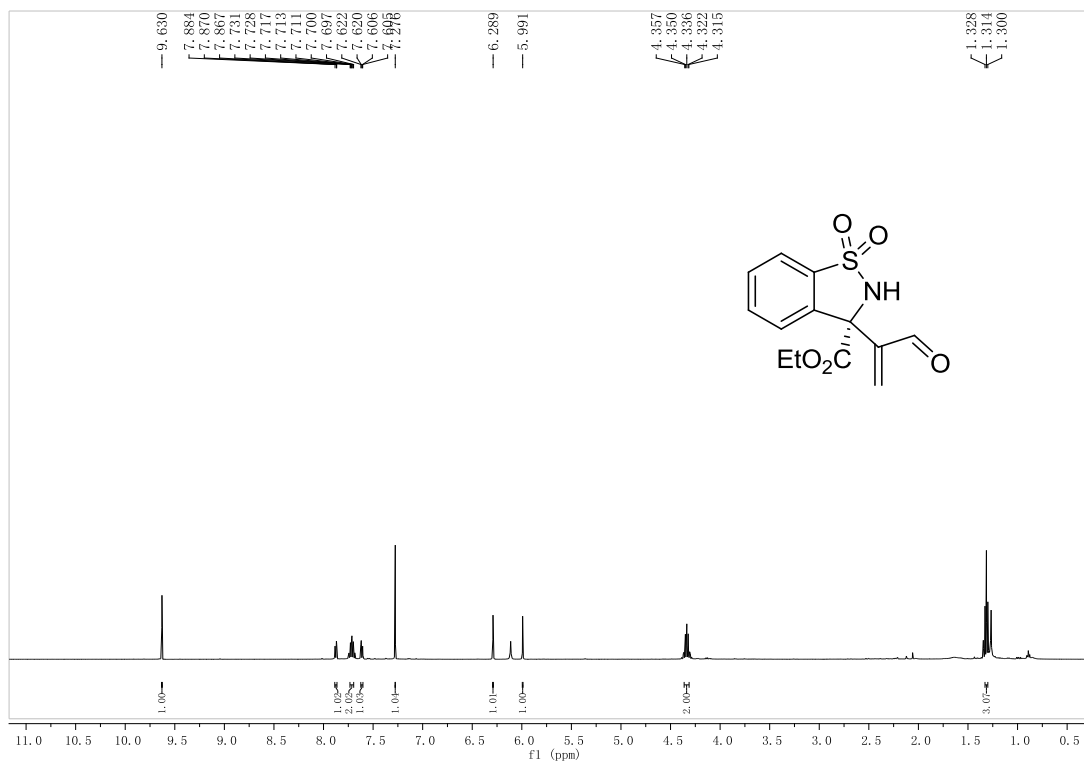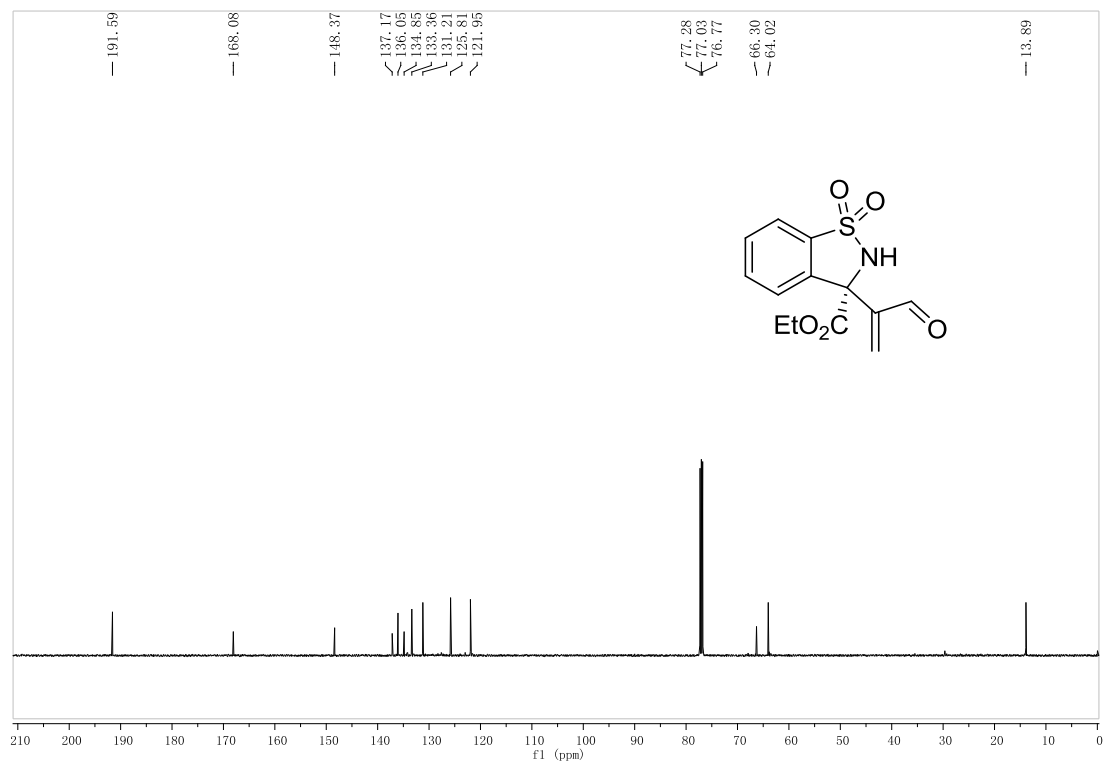

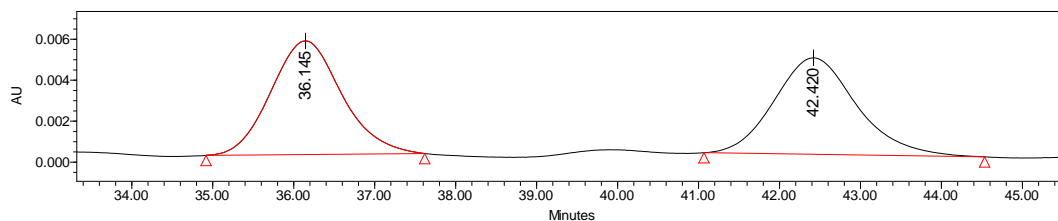

|   | Retention Time | Area   | % Area | Height | % Height |
|---|----------------|--------|--------|--------|----------|
| 1 | 36.145         | 337596 | 50.33  | 5545   | 54.08    |
| 2 | 42.420         | 333144 | 49.67  | 4709   | 45.92    |

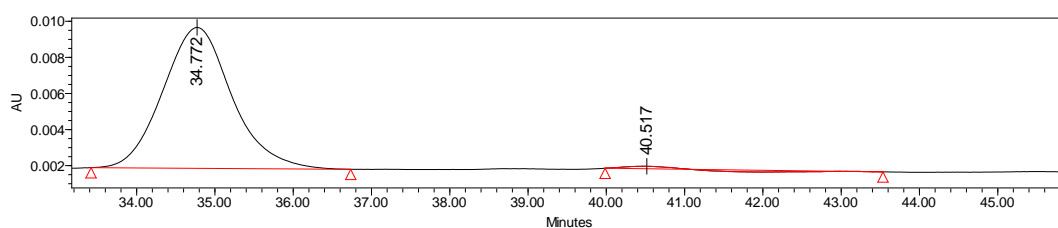

|   | Retention Time | Area   | % Area | Height | % Height |
|---|----------------|--------|--------|--------|----------|
| 1 | 34.772         | 483391 | 97.34  | 7834   | 97.27    |
| 2 | 40.517         | 13207  | 2.66   | 220    | 2.73     |

Methyl 3-(3-oxoprop-1-en-2-yl)-2,3-dihydrobenzo[d]isothiazole-3-carboxylate 1,1-dioxide (**5b**)

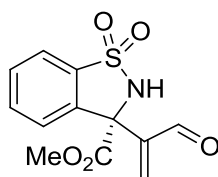

Reaction time: 8 hours. Purified by chromatography on silica gel, eluting with ethyl acetate/petroleum ether 1:2 (v/v), Rf: 0.5; yellow oil, 65% yield,  $[\alpha]_D^{25} = -131.2$  (c 1.0, CH<sub>2</sub>Cl<sub>2</sub>), 95% ee [Daicel Chiralcel AD-H column (25 cm × 0.46 cm ID), n-hexane/i-PrOH = 80/20, 0.8 mL/min, 254 nm;  $t_{\text{major}} = 35.4$  min,  $t_{\text{minor}} = 46.7$  min]; <sup>1</sup>H NMR (500 MHz, CDCl<sub>3</sub>) δ 9.62 (s, 1H), 7.86-7.88 (m, 1H), 7.68-7.75 (m, 2H), 7.59-7.61 (m, 1H), 6.30 (s, 1H), 6.11 (s, 1H), 6.00 (s, 1H), 3.87 (s, 3H). <sup>13</sup>C NMR (125 MHz, CDCl<sub>3</sub>) δ 191.7, 168.7, 148.3, 137.0, 136.1, 134.6, 133.4, 131.2, 125.9, 122.0,



66.2, 54.4. HRMS m/z (ESI+): Calculated for C<sub>12</sub>H<sub>12</sub>NO<sub>5</sub>S ([M+H]<sup>+</sup>) 282.0431, found 282.0431.

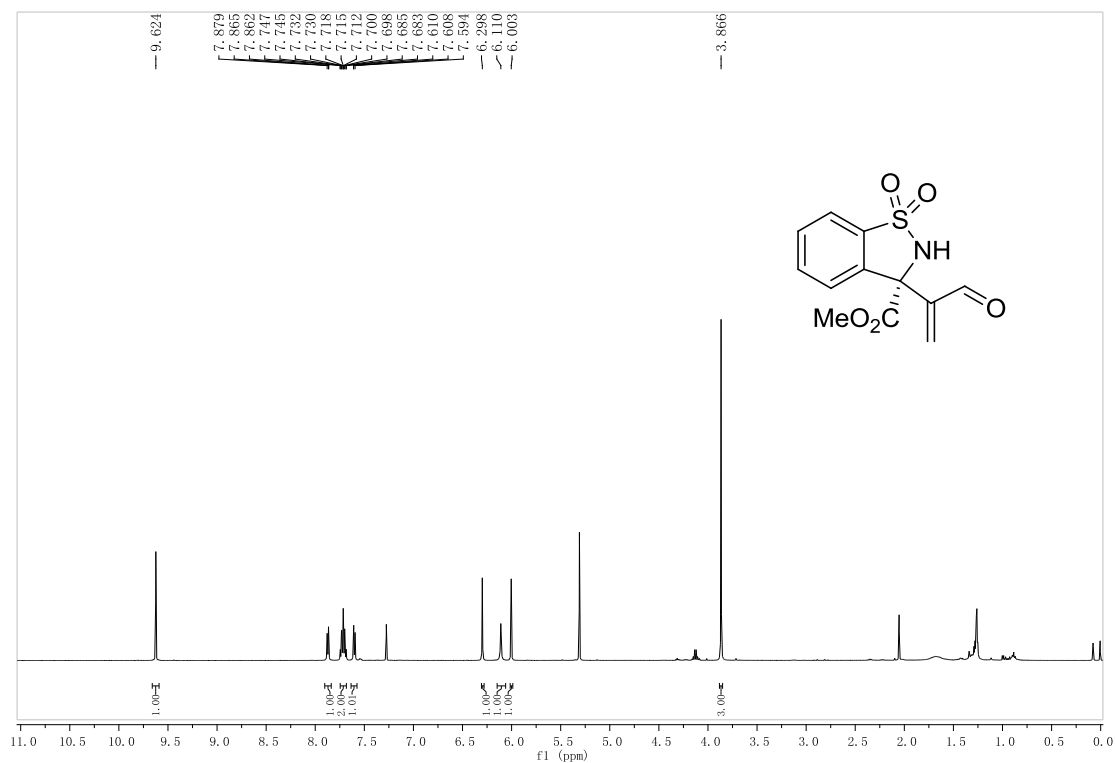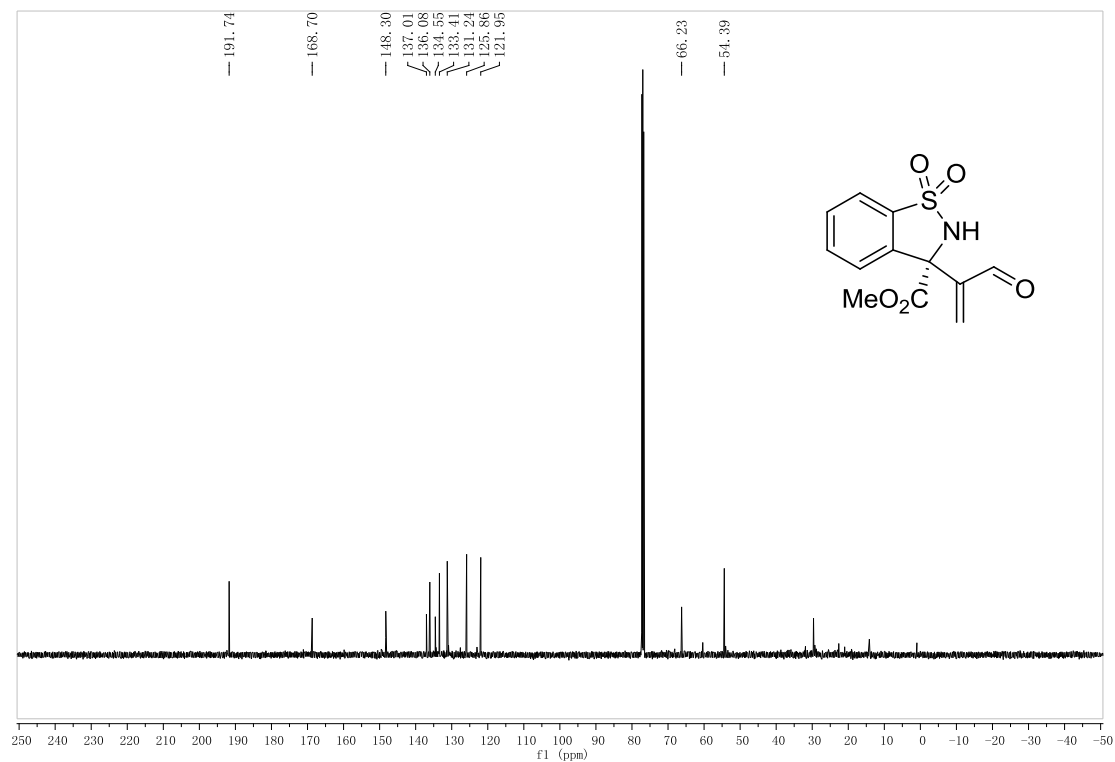

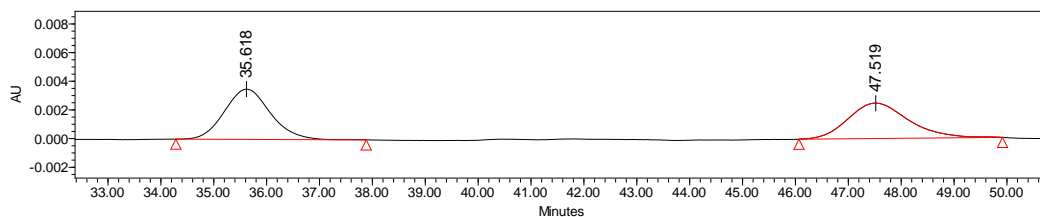

|   | Retention Time | Area   | % Area | Height | % Height |
|---|----------------|--------|--------|--------|----------|
| 1 | 35.618         | 205684 | 50.91  | 3475   | 58.44    |
| 2 | 47.520         | 198356 | 49.09  | 2471   | 41.56    |

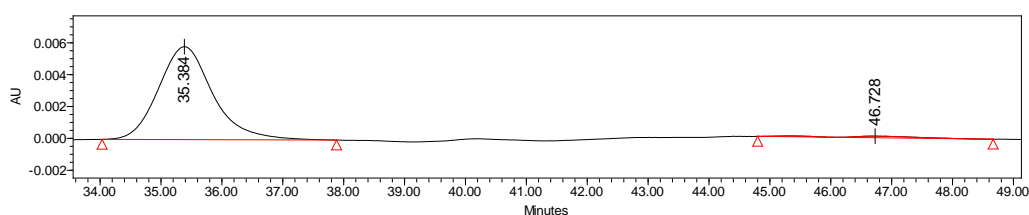

|   | Retention Time | Area   | % Area | Height | % Height |
|---|----------------|--------|--------|--------|----------|
| 1 | 35.384         | 361145 | 97.53  | 5830   | 98.26    |
| 2 | 46.728         | 9161   | 2.47   | 103    | 1.74     |

Ethyl 5-methyl-3-(3-oxoprop-1-en-2-yl)-2,3-dihydrobenzo[d]isothiazole-3-carboxylate 1,1-dioxide (**5c**)

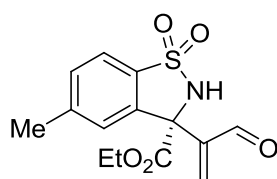

Reaction time: 12 hours. Purified by chromatography on silica gel, eluting with ethyl acetate/petroleum ether 1:2 (v/v), Rf: 0.5; yellow oil, 60% yield,  $[\alpha]_D^{25} = -299.0$  (c 1.0,  $\text{CH}_2\text{Cl}_2$ ), 90% ee [Daicel Chiralcel AD-H column (25 cm  $\times$  0.46 cm ID), n-hexane/*i*-PrOH = 80/20, 0.8 mL/min, 254 nm;  $t_{\text{major}} = 41.8$  min,  $t_{\text{minor}} = 47.6$  min];  $^1\text{H}$  NMR (500 MHz,  $\text{CDCl}_3$ )  $\delta$  9.62 (s, 1H), 7.74 (d,  $J = 8.0$  Hz, 1H), 7.48 (d,  $J = 8.0$  Hz, 1H), 7.37 (s, 1H), 6.28 (s, 1H), 6.08 (s, 1H), 6.01 (s, 1H), 4.29-4.38 (m, 2H), 2.51 (s, 3H), 1.32 (t,  $J = 7.5$  Hz, 3H).  $^{13}\text{C}$  NMR (125 MHz,  $\text{CDCl}_3$ )  $\delta$  191.6, 168.1, 148.5,

144.5, 136.0, 135.2, 134.6, 132.1, 125.9, 121.7, 66.2, 63.9, 21.9, 13.9. HRMS  $m/z$  (ESI+): Calculated for  $C_{14}H_{16}NO_5S$  ( $[M+H]^+$ ) 310.0744, found 310.0742.

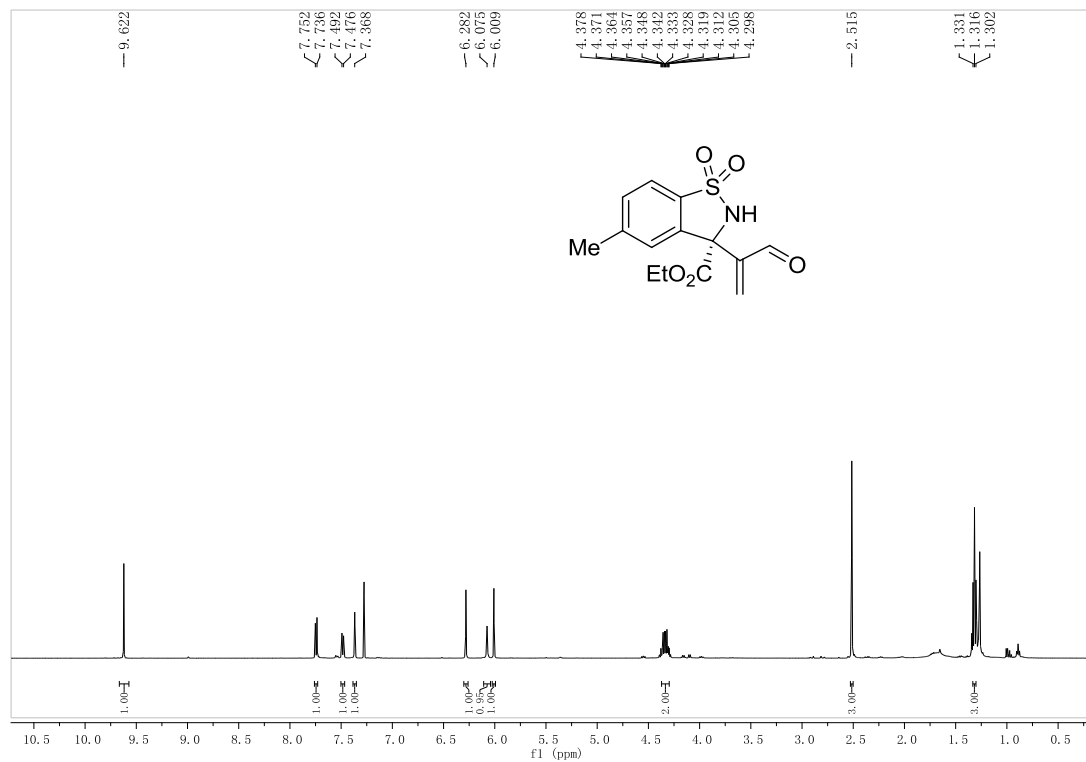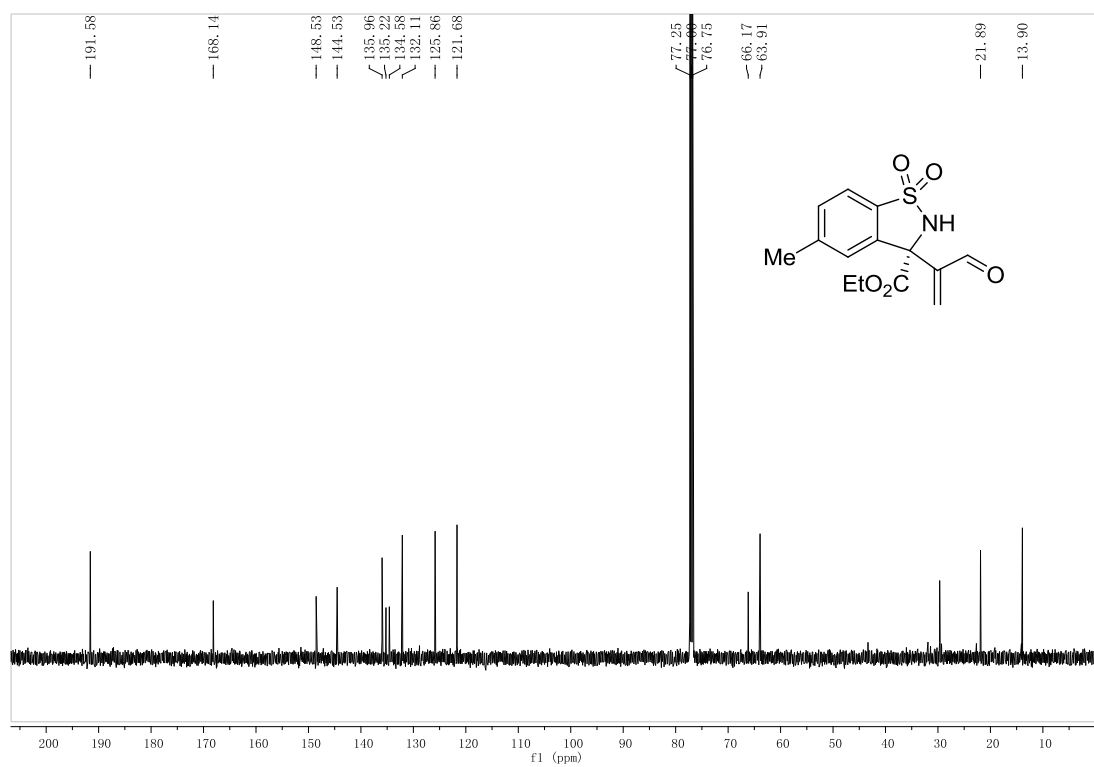

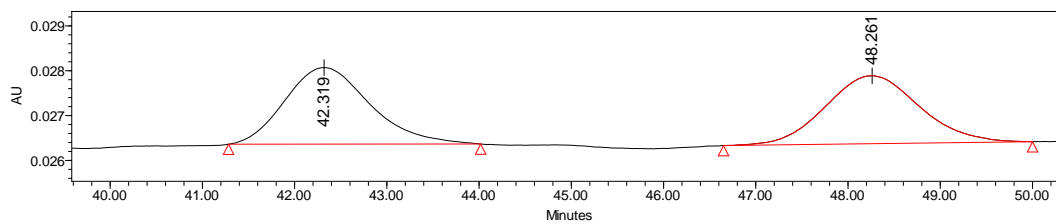

|   | Retention Time | Area   | % Area | Height | % Height |
|---|----------------|--------|--------|--------|----------|
| 1 | 42.319         | 109389 | 50.52  | 1707   | 52.96    |
| 2 | 48.261         | 107116 | 49.48  | 1516   | 47.04    |

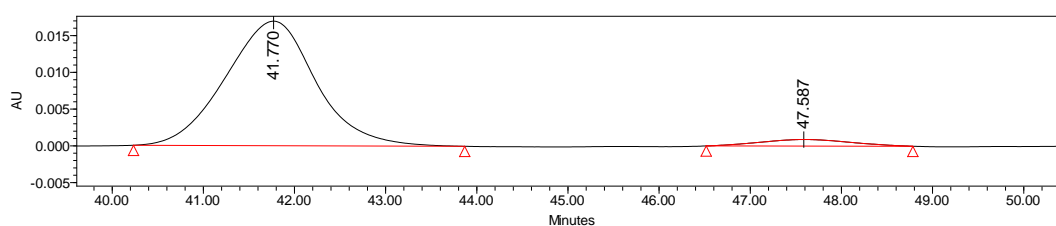

|   | Retention Time | Area    | % Area | Height | % Height |
|---|----------------|---------|--------|--------|----------|
| 1 | 41.770         | 1191609 | 95.19  | 17052  | 95.08    |
| 2 | 47.587         | 60236   | 4.81   | 882    | 4.92     |

Ethyl 5-chloro-3-(3-oxoprop-1-en-2-yl)-2,3-dihydrobenzo[d]isothiazole-3-carboxylate 1,1-dioxide (**5d**)

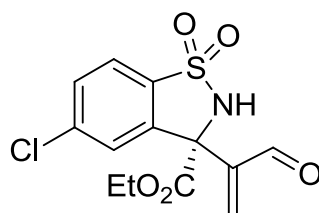

Reaction time: 12 hours. Purified by chromatography on silica gel, eluting with ethyl acetate/petroleum ether 1:2 (v/v), Rf: 0.5; yellow oil, 56% yield,  $[\alpha]_D^{25} = -172.0$  ( $c$  1.0,  $\text{CH}_2\text{Cl}_2$ ), 86% ee [Daicel Chiralcel AD-H column (25 cm  $\times$  0.46 cm ID), n-hexane/*i*-PrOH = 80/20, 0.8 mL/min, 254 nm;  $t_{\text{major}} = 34.8$  min,  $t_{\text{minor}} = 41.6$  min];  $^1\text{H}$  NMR (500 MHz,  $\text{CDCl}_3$ )  $\delta$  9.62 (s, 1H), 7.80 (d,  $J = 8.5$  Hz, 1H), 7.67 (dd,  $J = 8.0$ , 1.5 Hz, 1H), 7.58 (d,  $J = 2.0$  Hz, 1H), 6.33 (d,  $J = 1.0$  Hz, 1H), 6.16 (s, 1H), 6.03 (d,  $J = 1.0$  Hz, 1H), 4.32-4.40 (m, 2H), 1.32 (d,  $J = 7.0$  Hz, 3H).  $^{13}\text{C}$  NMR (125 MHz,

$\text{CDCl}_3$ )  $\delta$  191.3, 167.5, 147.9, 139.9, 137.1, 136.1, 135.8, 131.7, 126.0, 123.1, 65.9, 64.3, 13.9. HRMS  $m/z$  (ESI<sup>+</sup>): Calculated for  $\text{C}_{13}\text{H}_{13}\text{ClNO}_5\text{S}$  ( $[\text{M}+\text{H}]^+$ ) 330.0197, found 330.0186.

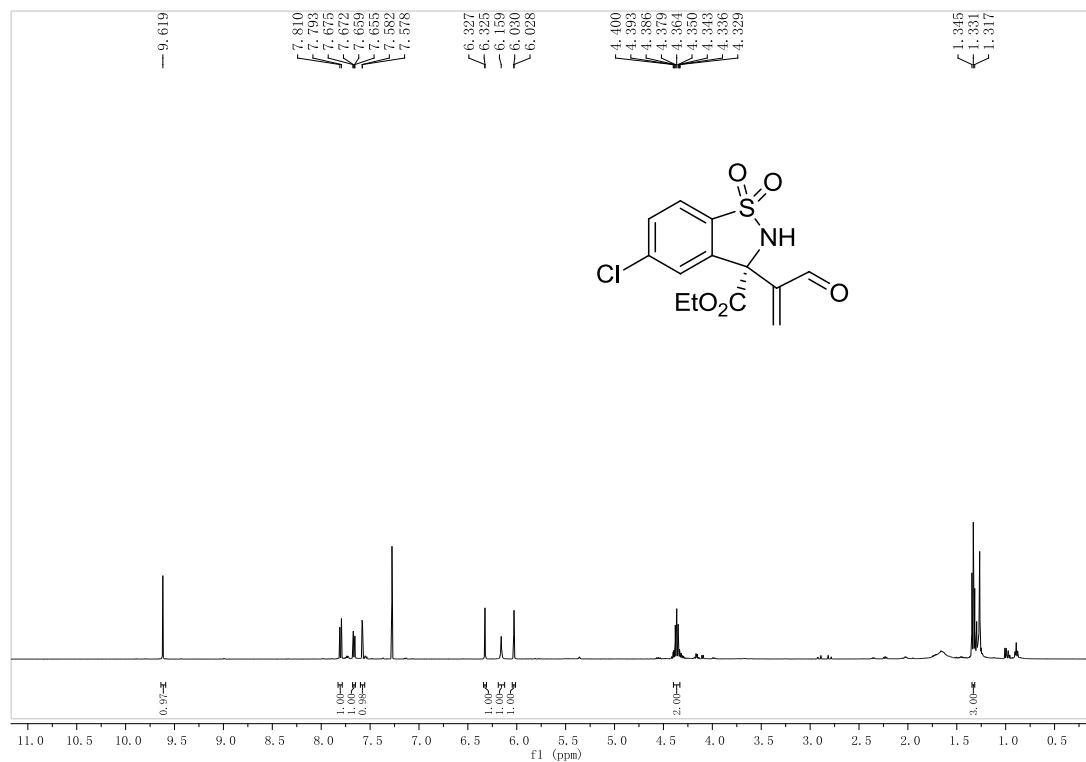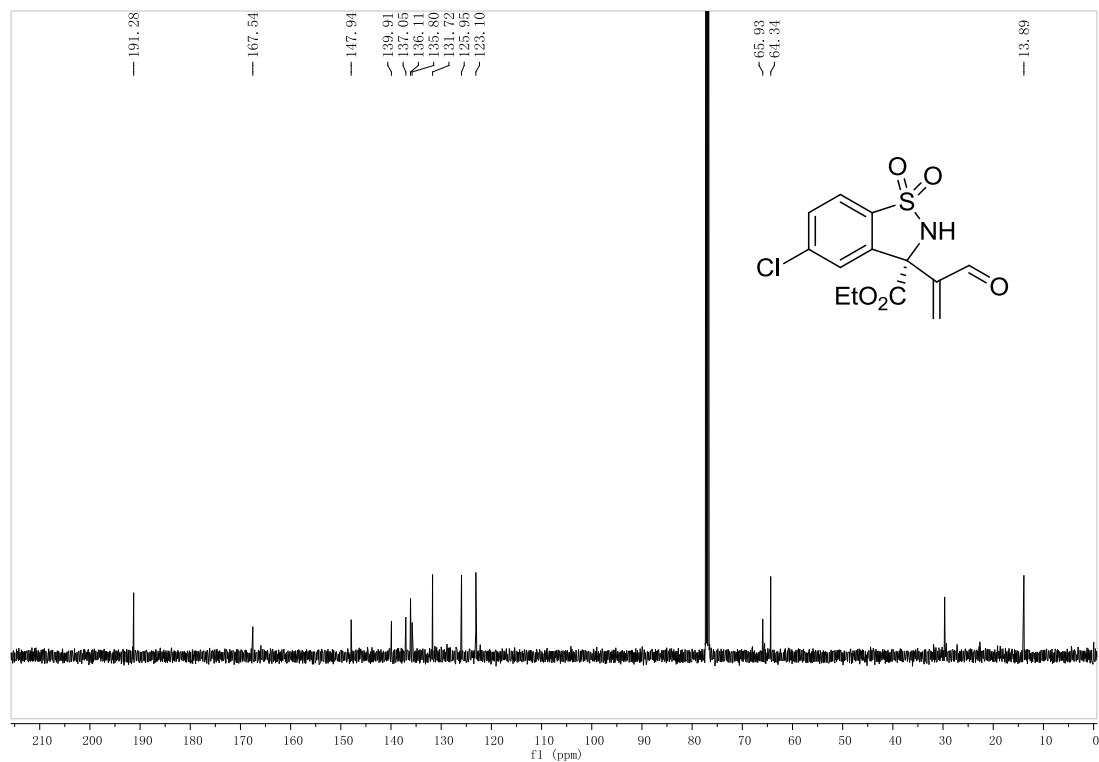

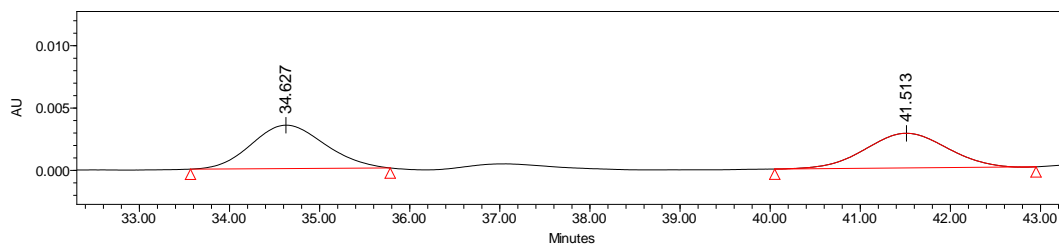

|   | Retention Time | Area   | % Area | Height | % Height |
|---|----------------|--------|--------|--------|----------|
| 1 | 34.627         | 180594 | 50.87  | 3343   | 54.71    |
| 2 | 41.513         | 174443 | 49.13  | 2767   | 45.29    |

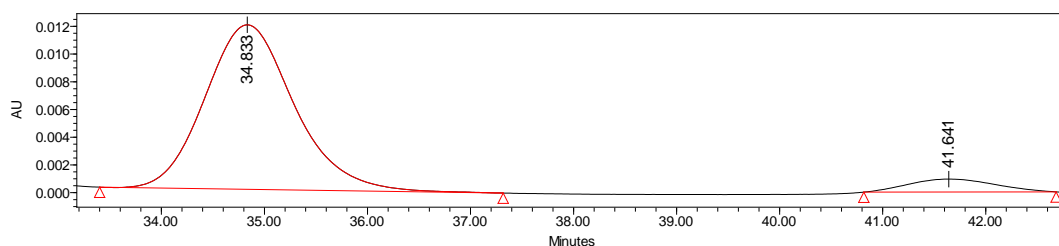

|   | Retention Time | Area   | % Area | Height | % Height |
|---|----------------|--------|--------|--------|----------|
| 1 | 34.833         | 715525 | 92.91  | 11871  | 92.68    |
| 2 | 41.641         | 54627  | 7.09   | 937    | 7.32     |

Ethyl 5-methoxy-3-(3-oxoprop-1-en-2-yl)-2,3-dihydrobenzo[d]isothiazole-3-carboxylate 1,1-dioxide (**5e**)

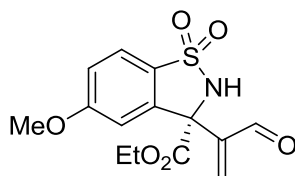

Reaction time: 12 hours. Purified by chromatography on silica gel, eluting with ethyl acetate/petroleum ether 1:2 (v/v), Rf: 0.4; yellow oil, 44% yield,  $[\alpha]_D^{25} = -98.9$  (*c* 1.0, CH<sub>2</sub>Cl<sub>2</sub>), 83% ee [Daicel Chiralcel AD-H column (25 cm × 0.46 cm ID), n-hexane/*i*-PrOH = 80/20, 0.8 mL/min, 254 nm;  $t_{\text{major}} = 59.8$  min,  $t_{\text{minor}} = 66.0$  min]; <sup>1</sup>H NMR (500 MHz, CDCl<sub>3</sub>) δ 9.62 (s, 1H), 7.77 (d, *J* = 8.5 Hz, 1H), 7.17 (dd, *J* = 8.0, 2.5 Hz, 1H), 7.01 (d, *J* = 2.5 Hz, 1H), 6.30 (s, 1H), 6.09 (s, 1H), 6.06 (s, 1H), 4.35-

4.40 (m, 1H), 4.29-4.33 (m, 1H), 3.91 (s, 3H), 1.31 (d,  $J = 7.0$  Hz, 3H).  $^{13}\text{C}$  NMR (125 MHz,  $\text{CDCl}_3$ )  $\delta$  191.6, 168.1, 163.6, 148.5, 137.5, 136.1, 129.3, 123.4, 117.4, 110.3, 66.0, 64.0, 56.1, 14.0. HRMS  $m/z$  (ESI $^+$ ): Calculated for  $\text{C}_{14}\text{H}_{16}\text{NO}_6\text{S}$  ( $[\text{M}+\text{H}]^+$ ) 326.0693, found 326.0695.

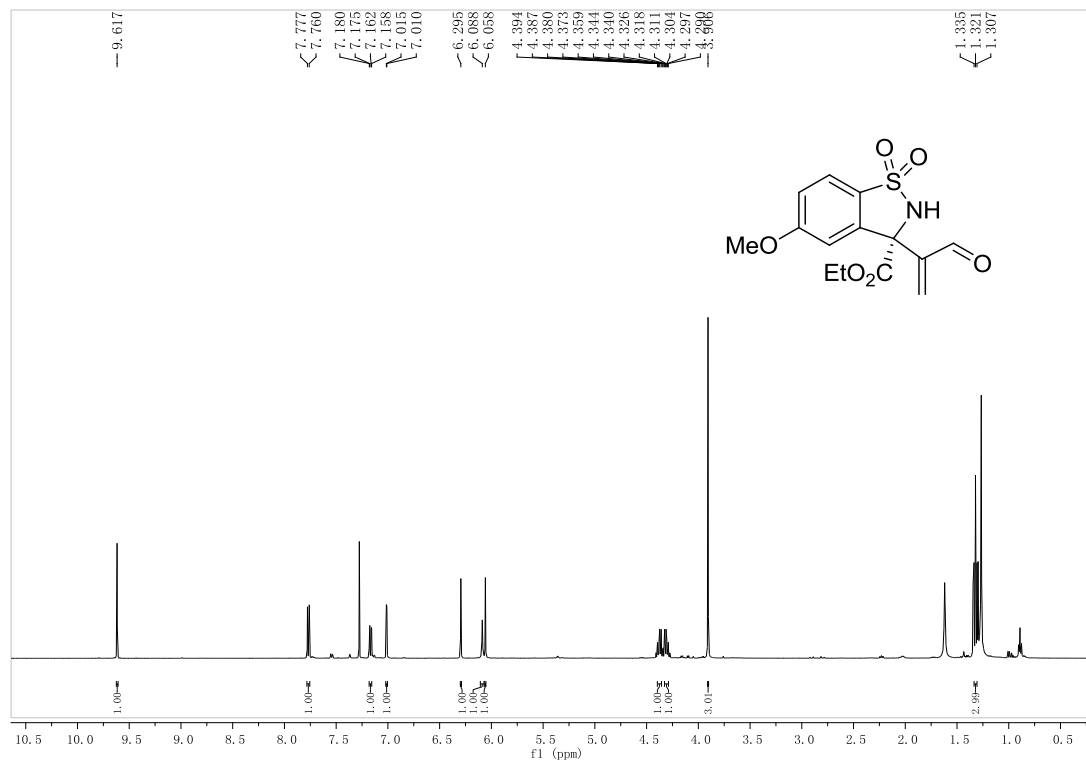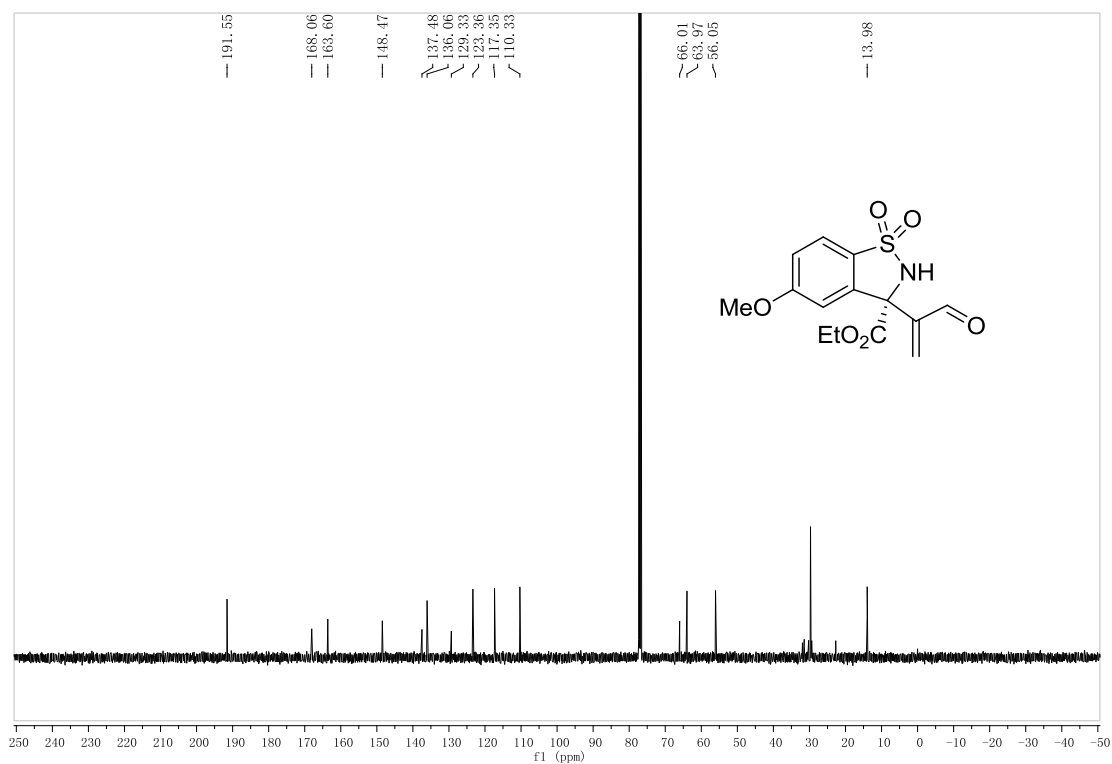

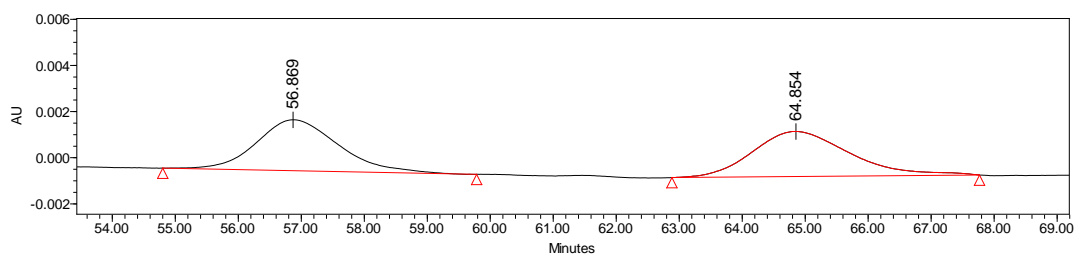

|   | Retention Time | Area   | % Area | Height | % Height |
|---|----------------|--------|--------|--------|----------|
| 1 | 56.871         | 196270 | 49.47  | 2194   | 53.19    |
| 2 | 64.854         | 200457 | 50.53  | 1931   | 46.81    |

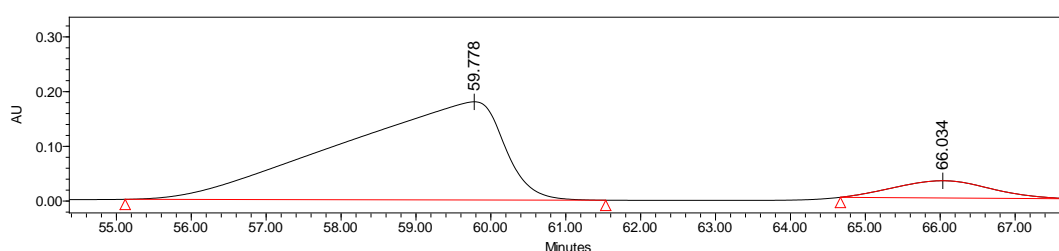

|   | Retention Time | Area     | % Area | Height | % Height |
|---|----------------|----------|--------|--------|----------|
| 1 | 59.778         | 27157642 | 91.33  | 179363 | 85.58    |
| 2 | 66.034         | 2578507  | 8.67   | 30223  | 14.42    |

Ethyl 8-methyl-2-(4-methyl-N-phenylphenylsulfonamido)-1-methylene-2,9b-dihydro-1H-azeto[1,2-c]benzo[e][1,2,3]oxathiazine-9b-carboxylate 4,4-dioxide (**7a**)

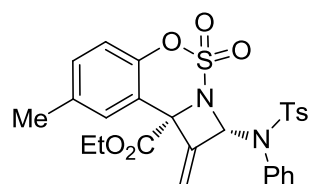

Reaction time: 12 hours. Purified by chromatography on silica gel, eluting with ethyl acetate/petroleum ether 1:5 (v/v), Rf: 0.4; yellow oil, 70% yield (there was a little part decomposed to the ring-opening acrylaldehyde product in the silica gel),  $[\alpha]_D^{25} = -5.2$  (*c* 1.0, CH<sub>2</sub>Cl<sub>2</sub>), 92% ee [Daicel Chiralcel AD-H column (25 cm × 0.46 cm ID), n-hexane/*i*-PrOH = 95/5, 0.8 mL/min, 254 nm;  $t_{\text{major}} = 39.5$  min,  $t_{\text{minor}} = 36.5$  min]; <sup>1</sup>H NMR (500 MHz, CDCl<sub>3</sub>) δ 7.64 (dd, *J* = 13.0, 8.0 Hz, 3H), 7.29-7.37 (m, 4H), 7.21-7.26 (m, 4H), 7.06-7.09 (m, 1H), 5.68 (t, *J* = 2.5 Hz, 1H), 5.53 (t, *J* = 2.5



Hz, 1H), 3.83-3.97 (m, 2H), 2.43 (s, 3H), 2.33 (s, 3H), 1.05 (t,  $J = 7.0$  Hz, 3H).  $^{13}\text{C}$  NMR (125 MHz,  $\text{CDCl}_3$ )  $\delta$  166.2, 147.4, 144.1, 142.4, 136.8, 135.4, 133.3, 131.3, 129.5, 129.2, 129.1, 128.6, 128.5, 126.1, 121.6, 119.6, 114.7, 79.1, 74.7, 62.5, 21.6, 21.0, 13.6. HRMS  $m/z$  (ESI+): Calculated for  $\text{C}_{30}\text{H}_{32}\text{N}_2\text{O}_7\text{S}_2$  ( $[\text{M}+\text{H}]^+$ ) 555.1254, found 555.1262.

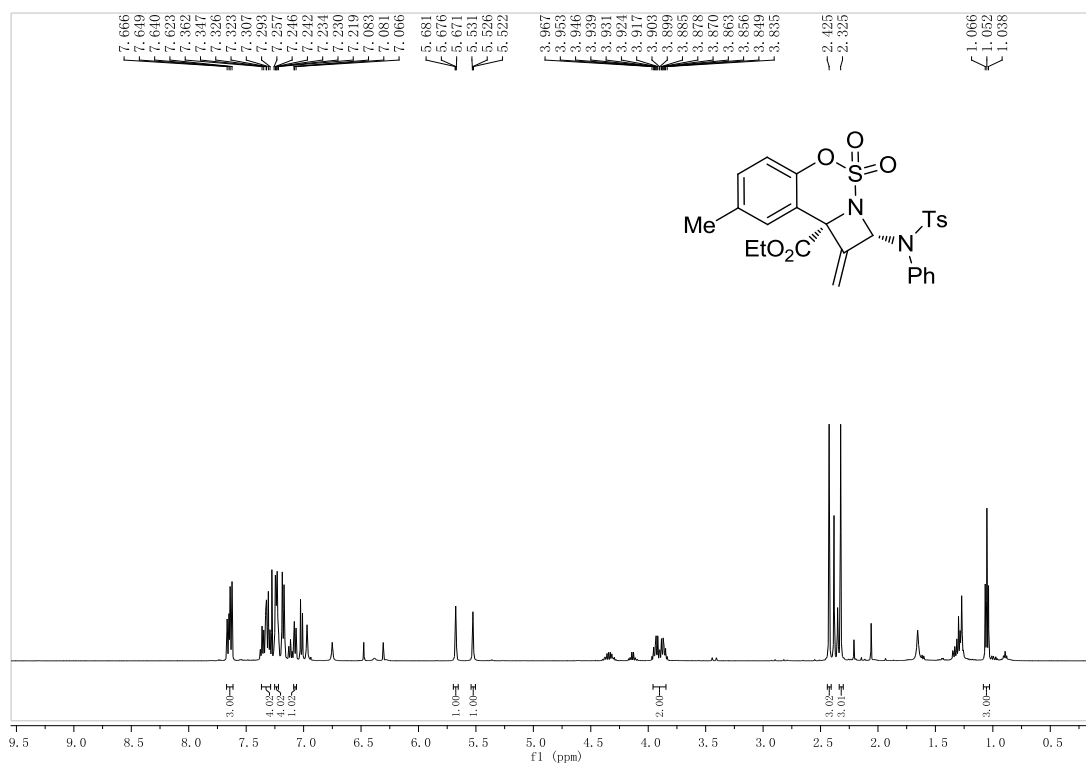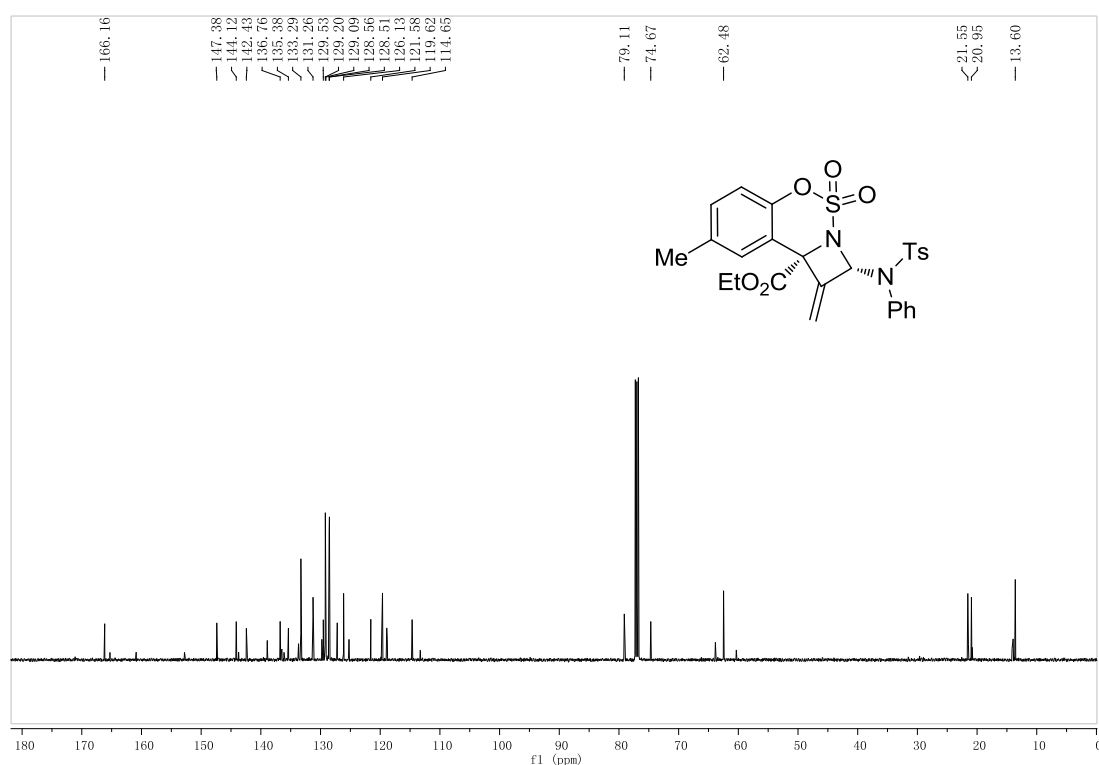

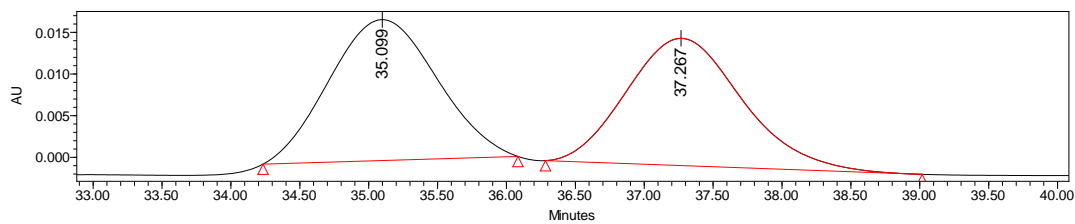

|   | Retention Time | Area   | % Area | Height | % Height |
|---|----------------|--------|--------|--------|----------|
| 1 | 35.099         | 916810 | 50.77  | 16906  | 52.56    |
| 2 | 37.267         | 889158 | 49.23  | 15261  | 47.44    |

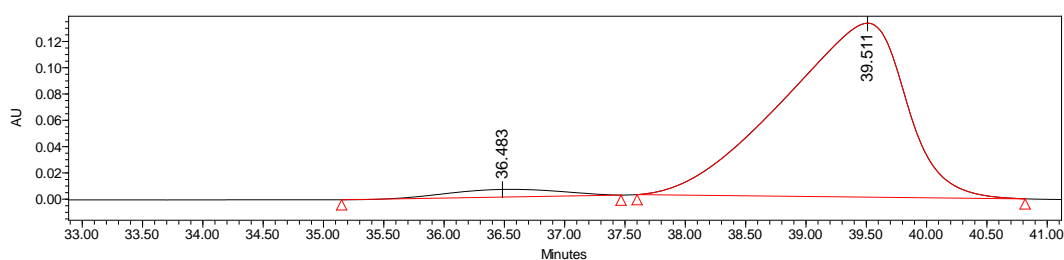

|   | Retention Time | Area    | % Area | Height | % Height |
|---|----------------|---------|--------|--------|----------|
| 1 | 36.483         | 380754  | 3.89   | 5881   | 4.26     |
| 2 | 39.511         | 9417508 | 96.11  | 132247 | 95.74    |

Ethyl 6-methyl-4-(3-oxoprop-1-en-2-yl)-3,4-dihydrobenzo[e][1,2,3]oxathiazine-4-carboxylate 2,2-dioxide (**8a**)

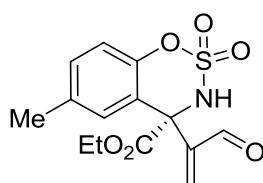

It was difficult to obtain a pure NMR spectrum due to the impurity in compound **7a**. Compound **7a** was therefore changed to **8a** through hydrolysis reaction by adding TsOH catalyst after the [2+2] reaction. Compound **8a** was purified by chromatography on silica gel, eluting with ethyl acetate/ dichloromethane/petroleum ether: 0.1/2/4 (v/v), Rf: 0.5; yellow oil, 65% yield for two steps,  $^1\text{H}$  NMR (500 MHz,  $\text{CDCl}_3$ )  $\delta$  9.60 (s, 1H), 7.23-7.25 (m, 2H), 7.02 (d,  $J = 9.0$  Hz, 1H), 6.48 (s, 1H), 6.37

(s, 1H), 6.31 (s, 1H), 4.29-4.38 (m, 2H), 2.35 (s, 3H), 1.30 (t,  $J = 7.5$  Hz, 3H).  $^{13}\text{C}$  NMR (125 MHz,  $\text{CDCl}_3$ )  $\delta$  191.0, 168.2, 149.6, 147.3, 139.6, 135.1, 132.0, 128.8, 119.9, 115.6, 66.2, 64.2, 20.9, 13.8.

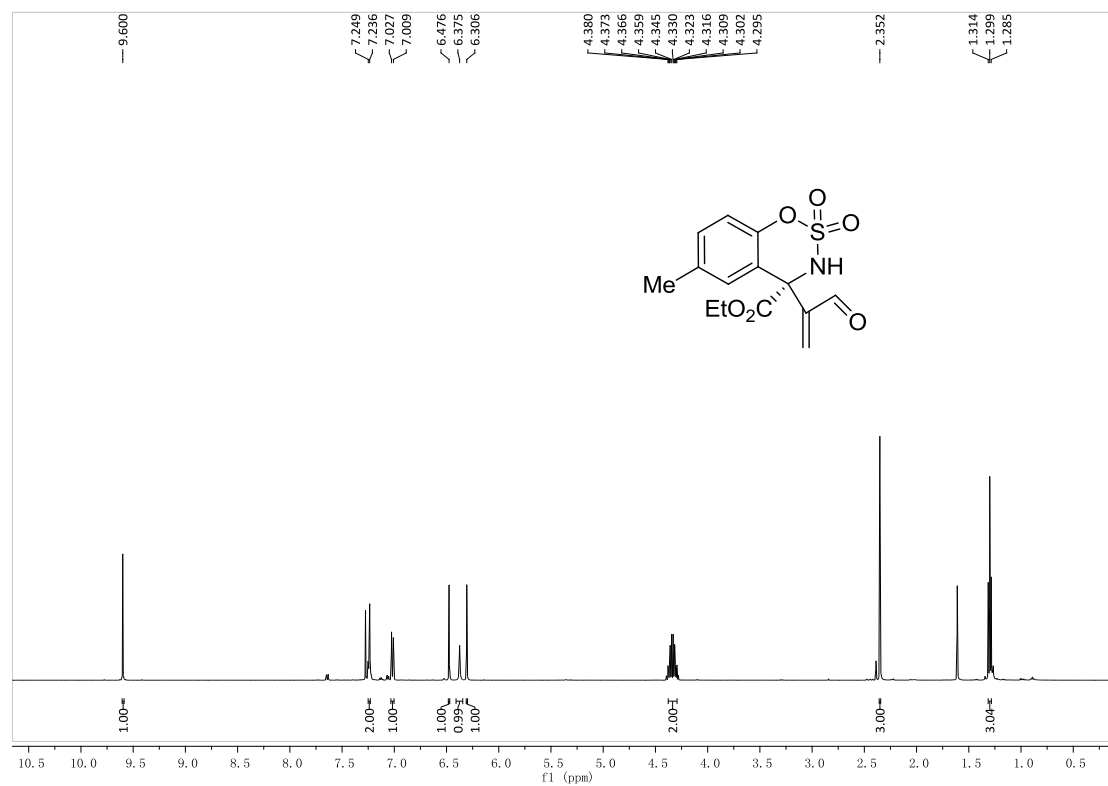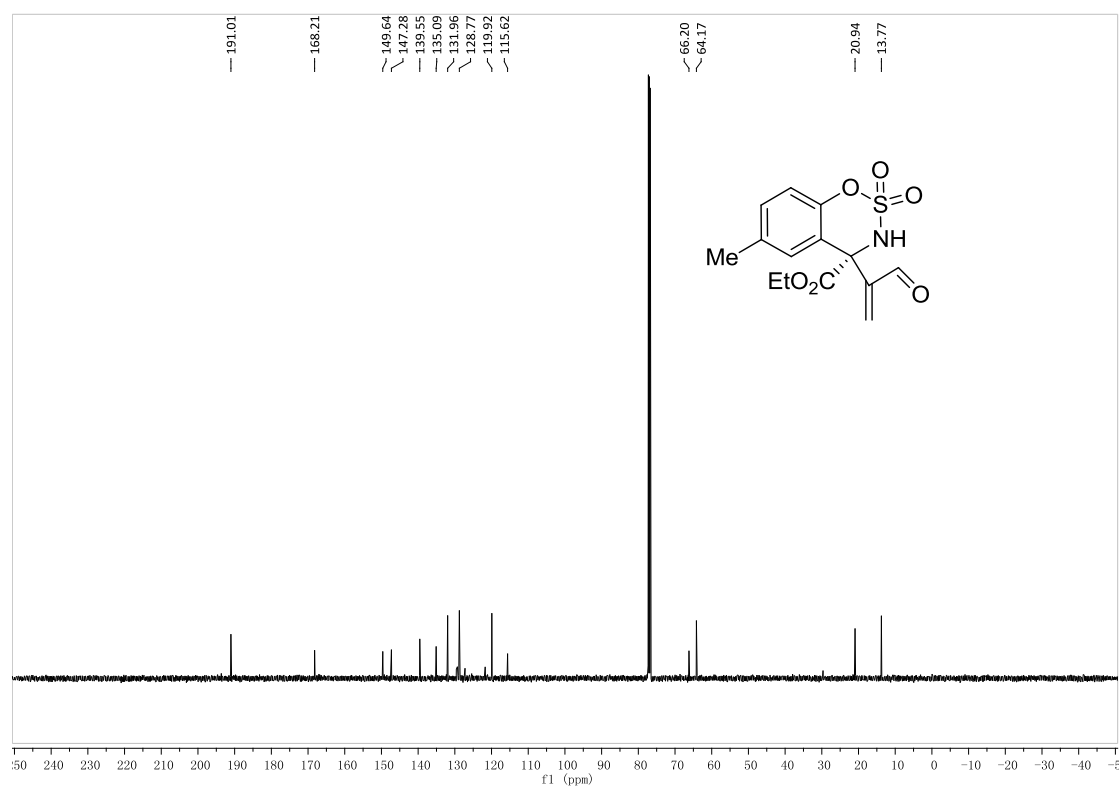

Ethyl 8-(tert-butyl)-2-(4-methyl-N-phenylphenylsulfonamido)-1-methylene-2,9b-dihydro-1H-azeto[1,2-c]benzo[e][1,2,3]oxathiazine-9b-carboxylate 4,4-dioxide (**7b**)

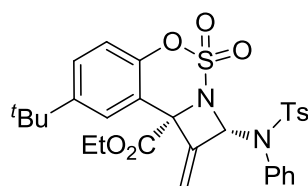

Reaction time: 12 hours. Purified by chromatography on silica gel, eluting with ethyl acetate/petroleum ether 1:7 (v/v), Rf: 0.5; yellow oil, 72% yield,  $[\alpha]_D^{25} = -4.3$  (c 1.0, CH<sub>2</sub>Cl<sub>2</sub>), 84% ee [Daicel Chiralcel AD-H column (25 cm × 0.46 cm ID), n-hexane/i-PrOH = 80/20, 0.8 mL/min, 254 nm;  $t_{\text{major}} = 9.1$  min,  $t_{\text{minor}} = 8.0$  min]; <sup>1</sup>H NMR (500 MHz, CDCl<sub>3</sub>) δ 7.64 (d, *J* = 8.5 Hz, 2H), 7.56 (d, *J* = 2.0 Hz, 1H), 7.35-7.41 (m, 2H), 7.31 (t, *J* = 7.5 Hz, 2H), 7.24 (d, *J* = 8.0 Hz, 2H), 7.17-7.20 (m, 2H), 7.06 (d, *J* = 8.5 Hz, 1H), 5.64 (t, *J* = 2.5 Hz, 1H), 5.52 (t, *J* = 2.5 Hz, 1H), 3.86-3.96 (m, 2H), 2.43 (s, 3H), 1.28 (s, 9H), 1.06 (t, *J* = 7.0 Hz, 3H). <sup>13</sup>C NMR (125 MHz, CDCl<sub>3</sub>) δ 166.1, 150.1, 147.2, 144.1, 142.7, 135.4, 133.4, 129.2, 129.1, 128.59, 128.57, 127.8, 122.7, 119.3, 118.5, 114.5, 79.2, 74.9, 62.5, 34.7, 31.2, 21.6, 13.7. HRMS *m/z* (ESI<sup>+</sup>): Calculated for C<sub>30</sub>H<sub>32</sub>N<sub>2</sub>O<sub>7</sub>S<sub>2</sub> ([M+H]<sup>+</sup>) 597.1724, found 597.1733.

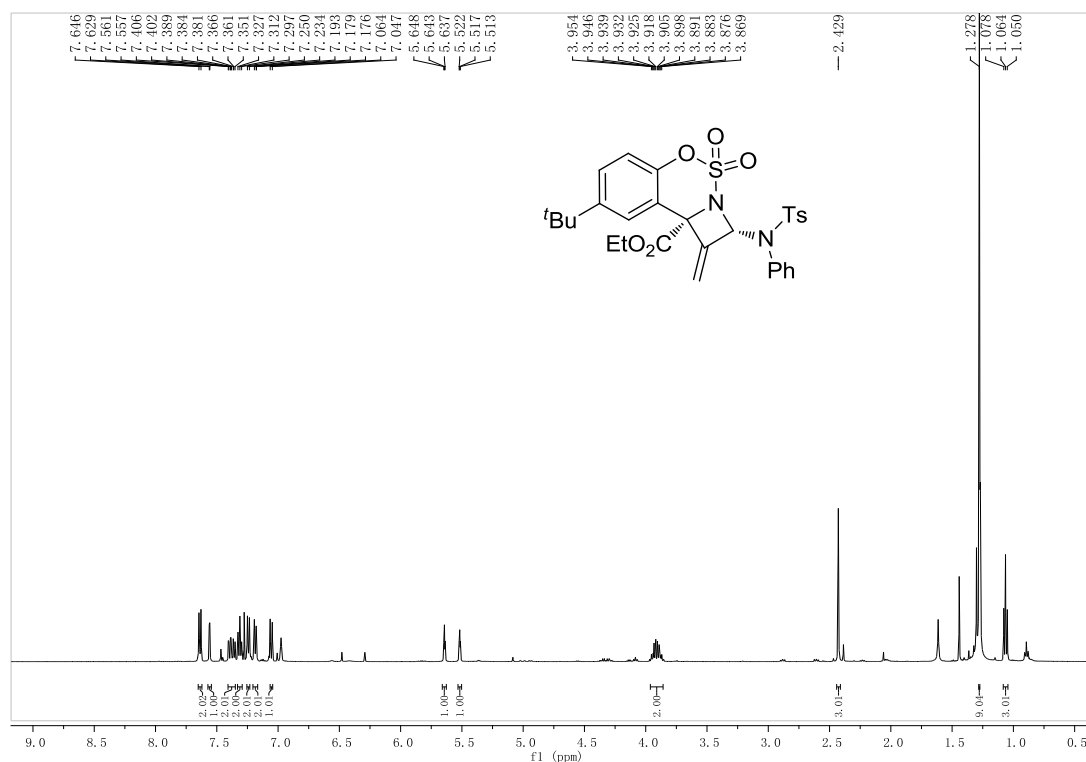

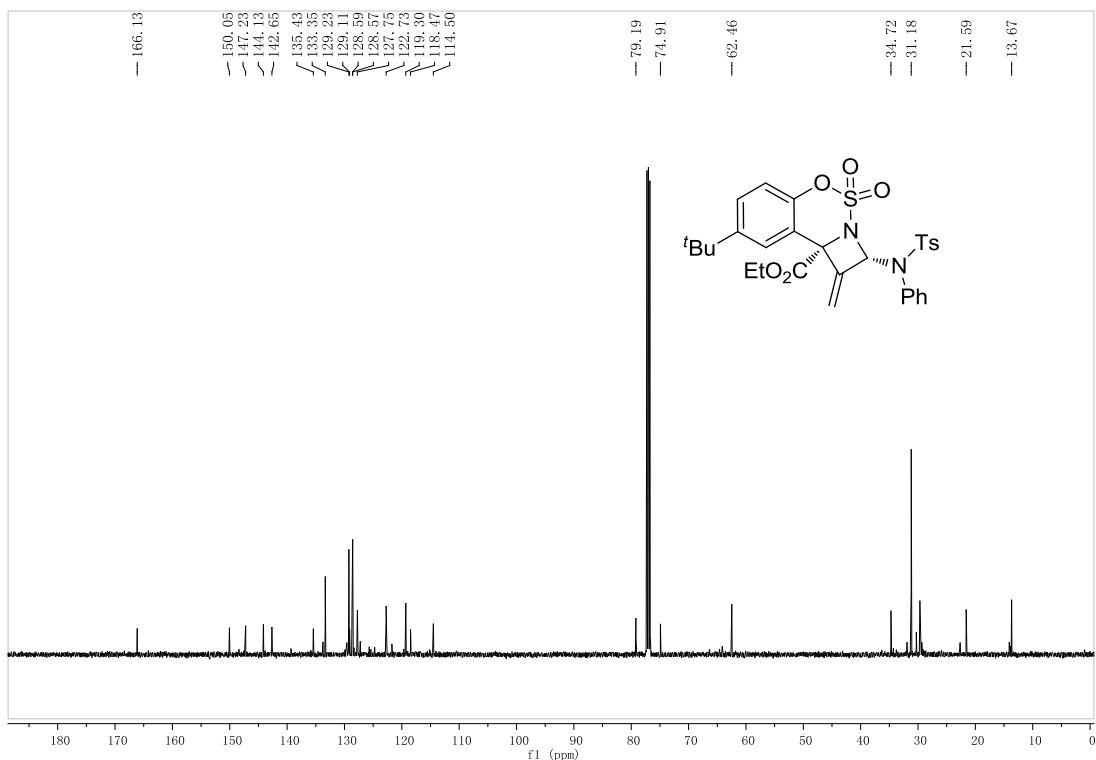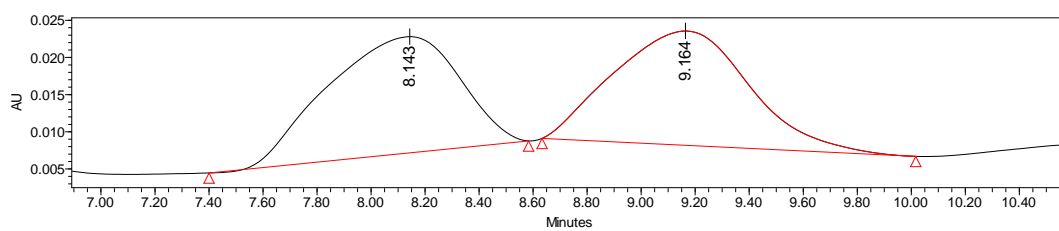

|   | Retention Time | Area   | % Area | Height | % Height |
|---|----------------|--------|--------|--------|----------|
| 1 | 8.143          | 537613 | 50.05  | 15640  | 50.42    |
| 2 | 9.164          | 536598 | 49.95  | 15377  | 49.58    |

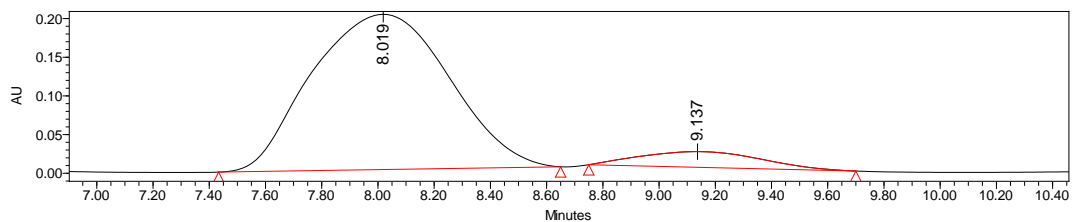

|   | Retention Time | Area    | % Area | Height | % Height |
|---|----------------|---------|--------|--------|----------|
| 1 | 8.019          | 6835282 | 91.98  | 200777 | 90.92    |
| 2 | 9.137          | 595823  | 8.02   | 20056  | 9.08     |

Ethyl 6-(tert-butyl)-4-(3-oxoprop-1-en-2-yl)-3,4-dihydrobenzo[e][1,2,3]oxathiazine-4-carboxylate 2,2-dioxide (**8b**)

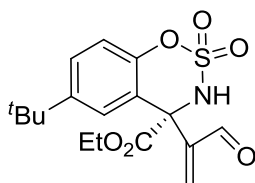

It was difficult to obtain a pure NMR spectrum due to the impurity in compound **7a**. Compound **7a** was therefore changed to **8a** through hydrolysis reaction by adding TsOH catalyst after the [2+2] reaction. Compound **8a** was purified by chromatography on silica gel, eluting with ethyl acetate/ dichloromethane/petroleum ether: 0.1/2/4 (v/v), Rf: 0.6; colorless oil, 63% yield for two steps,  $^1\text{H}$  NMR (500 MHz,  $\text{CDCl}_3$ )  $\delta$  9.61 (s, 1H), 7.44-7.47 (m, 2H), 7.04-7.07 (m, 1H), 6.48 (s, 1H), 6.42 (s, 1H), 6.29 (s, 1H), 4.27-4.38 (m, 2H), 1.29-1.31 (m, 9H).  $^{13}\text{C}$  NMR (125 MHz,  $\text{CDCl}_3$ )  $\delta$  191.1, 168.4, 149.5, 148.4, 147.5, 139.4, 128.3, 125.7, 119.6, 115.1, 66.3, 64.2, 34.6, 31.2, 13.9.

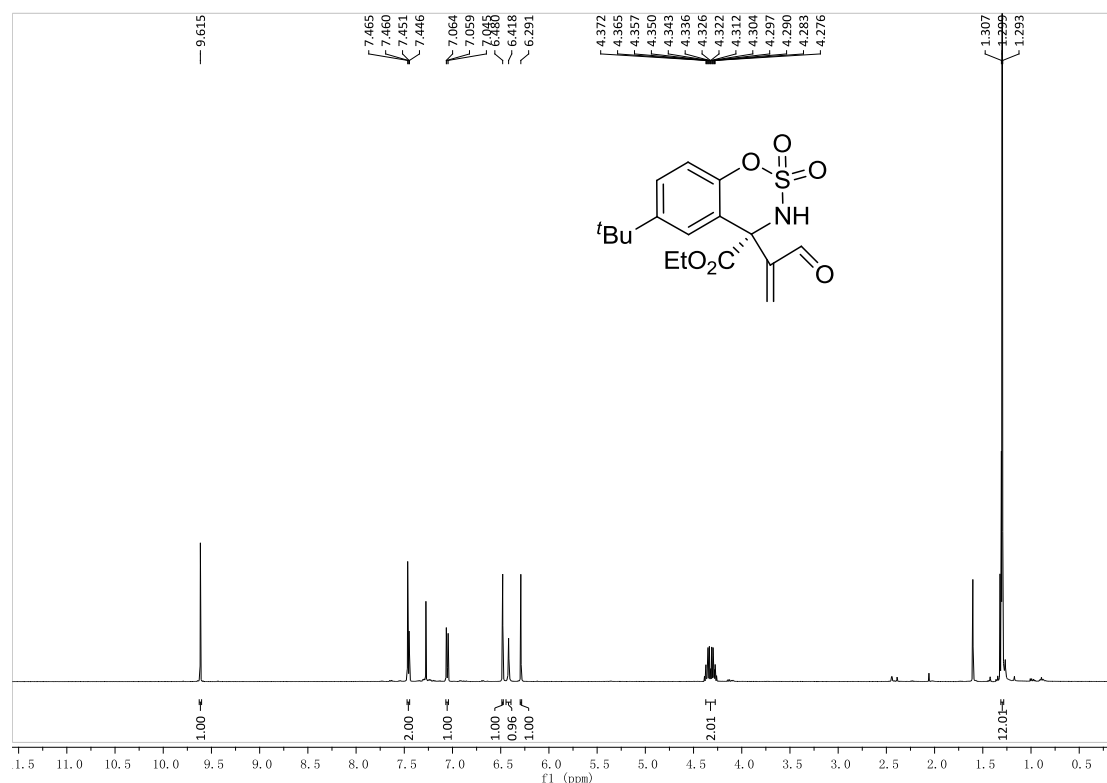

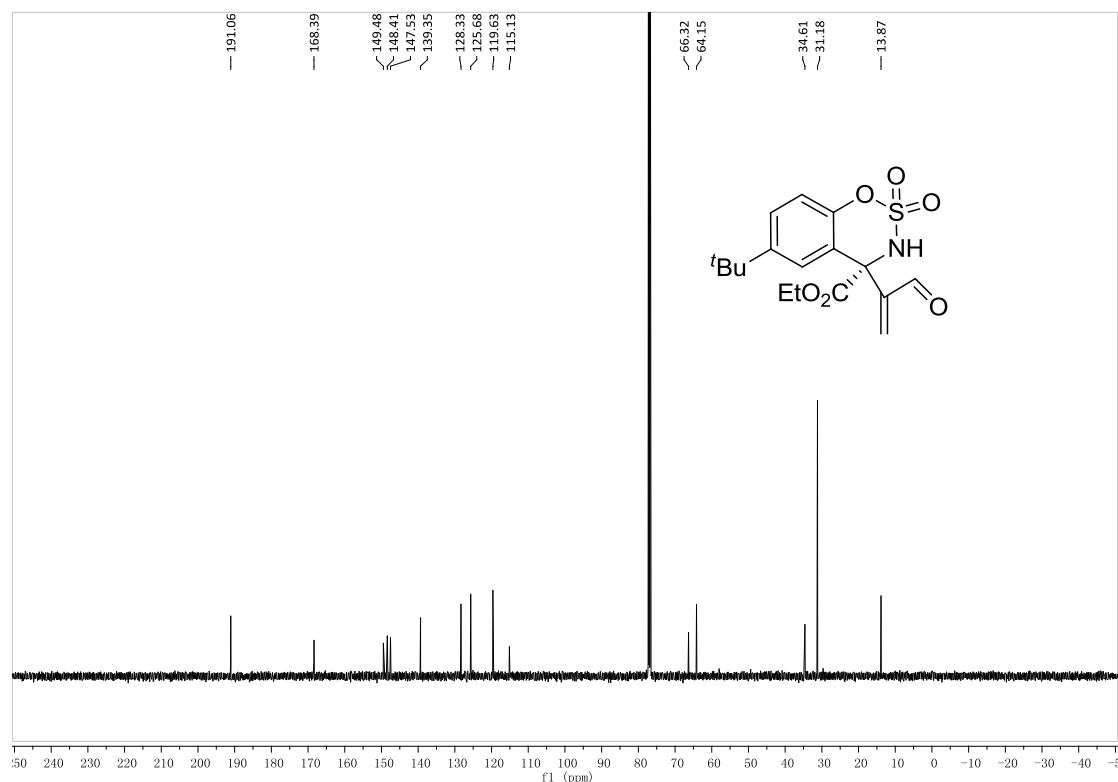

Ethyl 4-(3-oxoprop-1-en-2-yl)-3,4-dihydrobenzo[e][1,2,3]oxathiazine-4-carboxylate 2,2-dioxide (**8c**)

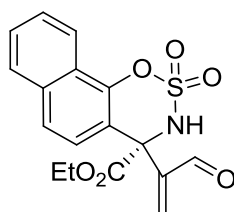

Reaction time: 14 hours. Purified by chromatography on silica gel, eluting with ethyl acetate/dichloromethane/petroleum ether = 0.1/2/4 (v/v), Rf: 0.4; yellow oil, 63% yield for two steps,  $[\alpha]_D^{25} = -10.7$  (*c* 1.0, CH<sub>2</sub>Cl<sub>2</sub>), 82% ee [Daicel Chiralcel AD-H column (25 cm × 0.46 cm ID), n-hexane/*i*-PrOH = 80/20, 0.8 mL/min, 254 nm;  $t_{\text{major}} = 58.8$  min,  $t_{\text{minor}} = 31.8$  min]; <sup>1</sup>H NMR (500 MHz, CDCl<sub>3</sub>) δ 9.63 (s, 1H), 8.22-8.25 (m, 1H), 7.87 (dd, *J* = 4.5, 3.0 Hz, 1H), 7.70 (d, *J* = 8.5 Hz, 1H), 7.64-7.67 (m, 2H), 7.48 (d, *J* = 8.5 Hz, 1H), 6.60 (s, 1H), 6.51 (s, 1H), 6.32 (s, 1H), 4.35 (q, *J* = 7.5 Hz, 2H), 1.32 (t, *J* = 7.0 Hz, 3H). <sup>13</sup>C NMR (125 MHz, CDCl<sub>3</sub>) δ 191.0, 168.2, 147.9, 146.8, 139.9, 134.3, 128.5, 127.6, 127.5, 125.0, 124.7, 123.7, 121.4, 111.0, 66.6, 64.4,

13.8. HRMS  $m/z$  (ESI<sup>+</sup>): Calculated for C<sub>17</sub>H<sub>15</sub>NO<sub>6</sub>S ([M+H]<sup>+</sup>) 362.0693, found 362.0711.

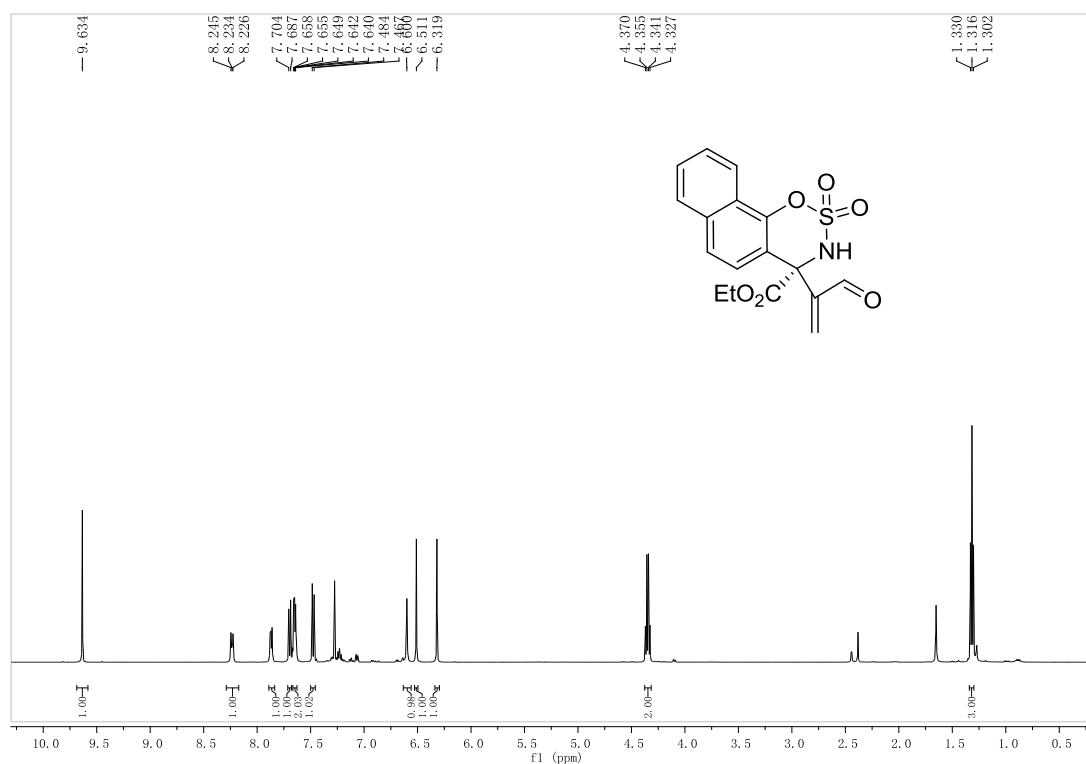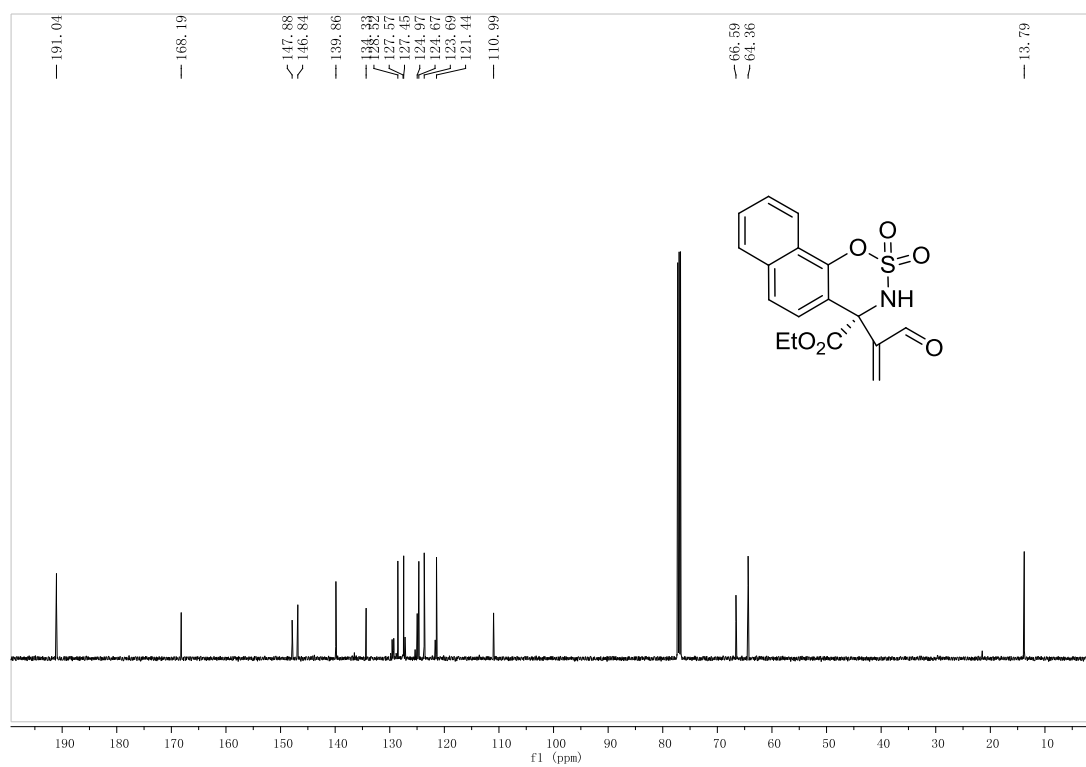



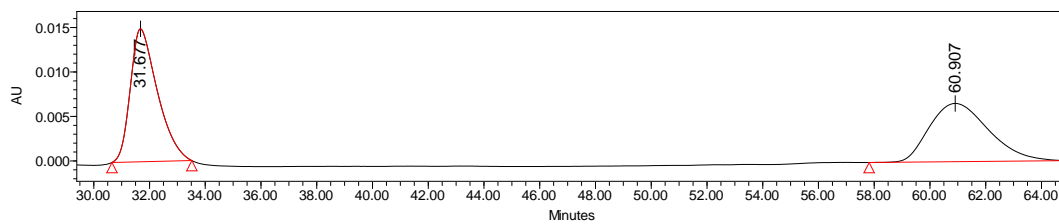

|   | Retention Time | Area    | % Area | Height | % Height |
|---|----------------|---------|--------|--------|----------|
| 1 | 31.677         | 1007996 | 51.08  | 14948  | 69.54    |
| 2 | 60.907         | 965302  | 48.92  | 6549   | 30.46    |

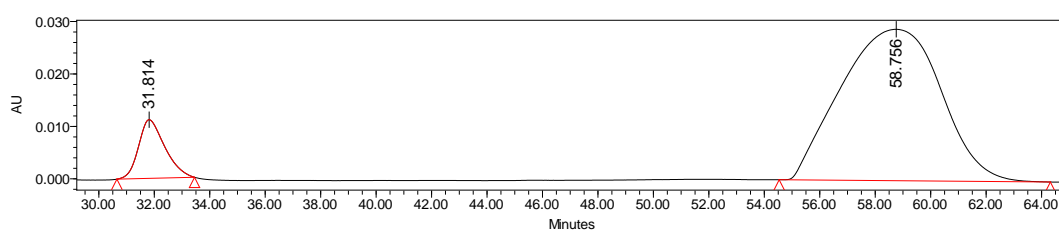

|   | Retention Time | Area    | % Area | Height | % Height |
|---|----------------|---------|--------|--------|----------|
| 1 | 31.814         | 738695  | 9.24   | 11205  | 27.97    |
| 2 | 58.756         | 7258817 | 90.76  | 28855  | 72.03    |

### 3. Synthetic transformations of compound **3aa**:

Ethyl 1-methyl-2-((4-methyl-N-phenylphenyl)sulfonamido)-1,2-dihydro-8bH-azeto[1,2-b]benzo[d]isothiazole-8b-carboxylate 4,4-dioxide (**9**)

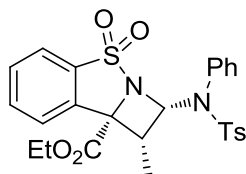

To a dried Schlenk tube was added Pd/C (40 mg, 0.02 mmol) and compound **3aa** (104.9 mg, 0.2 mmol), followed by the addition of 2.0 mL MeOH through a syringe. The resulting mixture was stirred under a H<sub>2</sub> balloon at room temperature for 12 h until the reaction was completed (monitored by TLC). The solvent was then removed under vacuum and the residue was purified by chromatography on silica gel, eluting with ethyl acetate/petroleum ether 1:3 (v/v) to afford compound **9**. colorless oil, 76% yield,  $[\alpha]_D^{15} = -105.6$  (c = 1.0 in CH<sub>2</sub>Cl<sub>2</sub>), 97% ee [Lux 5u Cellulose-2 column (25 cm × 0.46 cm ID), n-hexane/i-PrOH = 80/20, 0.7 mL/min, 254 nm;  $t_{\text{major}} = 63.4$  min,  $t_{\text{minor}} = 70.6$  min]; <sup>1</sup>H NMR (500 MHz, CDCl<sub>3</sub>): δ 7.75-7.79 (m, 2H), 7.69-7.73 (m, 1H), 7.62-7.67 (m, 1H), 7.50 (d, *J* = 8.0 Hz, 2H), 7.32-7.36 (m, 5H), 7.20 (d, *J* = 8.0 Hz, 2H), 6.19 (d, *J* = 8.0 Hz, 1H), 4.01-4.09 (m, 1H), 3.91-3.98 (m, 1H), 3.26-3.33 (m, 1H), 2.41 (s, 3H), 1.36 (d, *J* = 7.5 Hz, 3H), 1.04 (t, *J* = 7.0 Hz, 3H). <sup>13</sup>C NMR (125 MHz, CDCl<sub>3</sub>): δ 166.7, 143.9, 138.7, 135.6, 135.4, 135.0, 134.1, 133.6, 130.8, 129.2, 128.7, 128.4, 128.3, 125.8, 122.0, 73.1, 72.4, 62.0, 46.2, 21.6, 13.9, 12.2. HRMS *m/z* (ESI<sup>+</sup>): Calculated for C<sub>26</sub>H<sub>27</sub>N<sub>2</sub>O<sub>6</sub>S<sub>2</sub> ([M+H]<sup>+</sup>) 527.1305, found 527.1305.

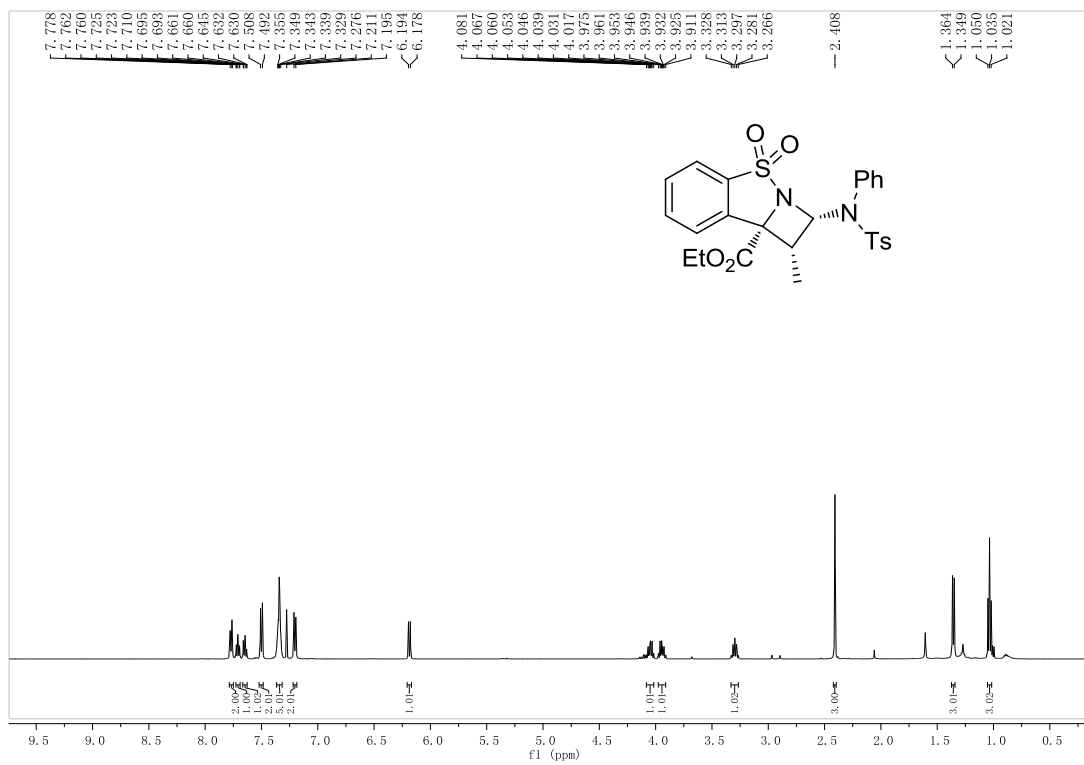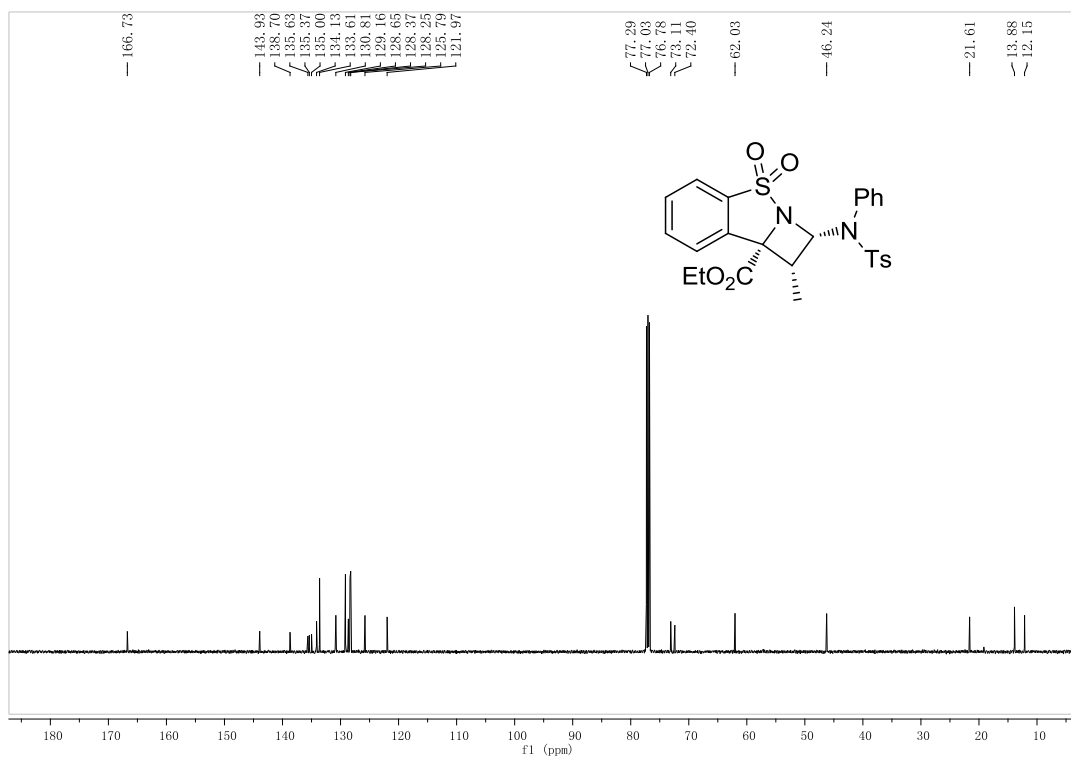

HJJ-11-77 CDC13 1114

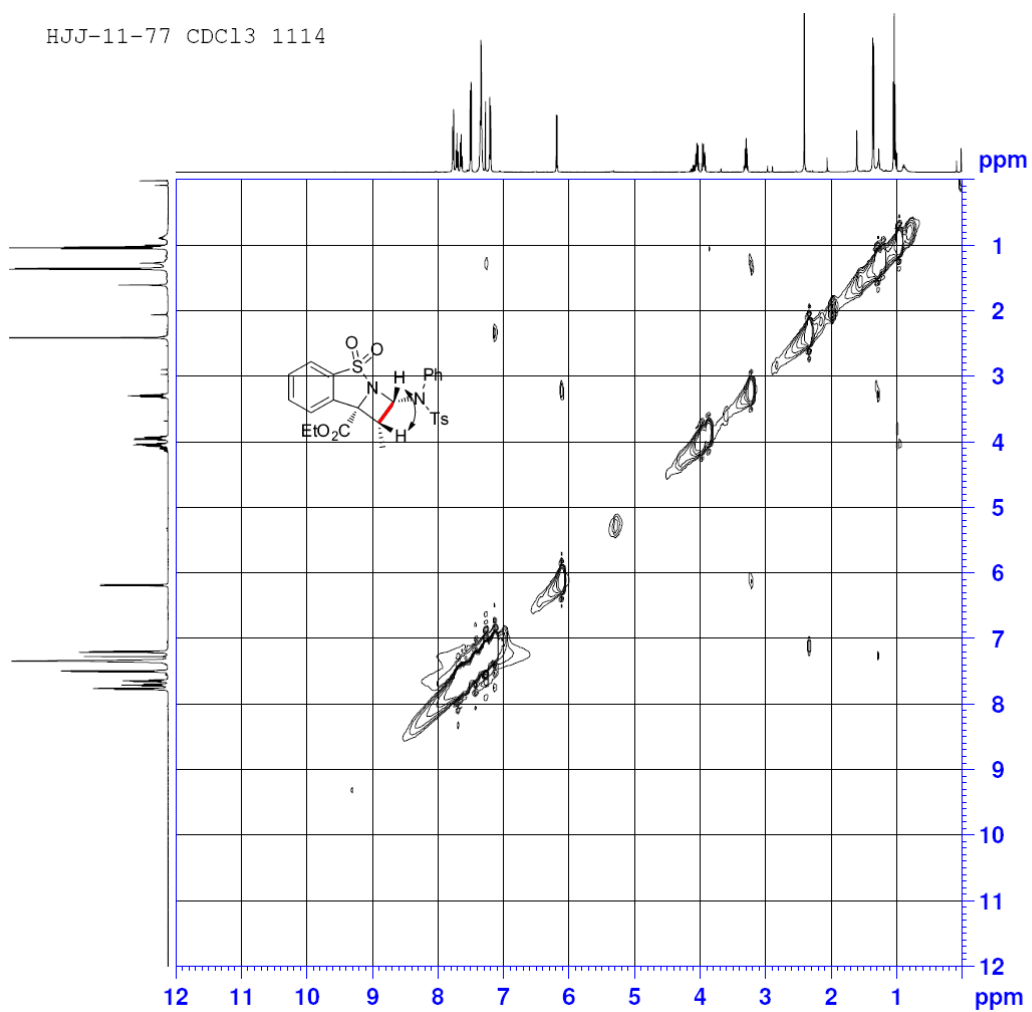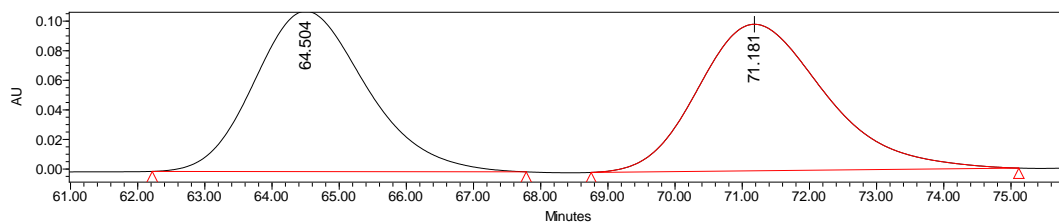

|   | Retention Time | Area     | % Area | Height | % Height |
|---|----------------|----------|--------|--------|----------|
| 1 | 64.504         | 12576557 | 49.08  | 108494 | 52.27    |
| 2 | 71.181         | 13050247 | 50.92  | 99075  | 47.73    |

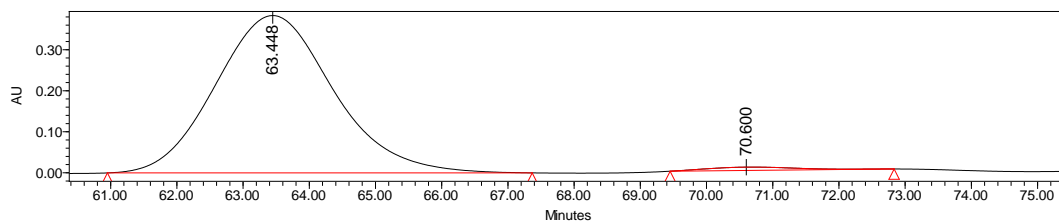

|   | Retention Time | Area     | % Area | Height | % Height |
|---|----------------|----------|--------|--------|----------|
| 1 | 63.448         | 46985613 | 98.44  | 382059 | 97.88    |
| 2 | 70.600         | 742757   | 1.56   | 8260   | 2.12     |

Ethyl 3-(3-oxoprop-1-en-2-yl)-2,3-dihydrobenzo[d]isothiazole-3-carboxylate 1,1-dioxide (**5a**)

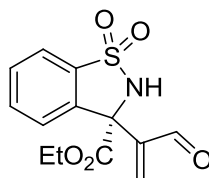

To a dried Schlenk tube was added TsOH·H<sub>2</sub>O (3.8 mg, 0.02 mmol) and compound **3aa** (104.9 mg, 0.2 mmol) under N<sub>2</sub>. 1.0 mL DCE solvent was then added through a syringe. The resulting mixture was stirred at 60 °C for 3.0 h until the reaction was completed (monitored by TLC). The solvent was then removed under vacuum and the residue was purified by chromatography on silica gel, eluting with ethyl acetate/petroleum ether 1:2 (v/v) to afford compound **5a**. Light yellow oil, 80% yield,  $[\alpha]_D^{15} = -230.8$  (c = 1.0 in CH<sub>2</sub>Cl<sub>2</sub>), 99% ee [Lux 5u Cellulose-2 column (25 cm × 0.46 cm ID), n-hexane/*i*-PrOH = 80/20, 0.8 mL/min, 254 nm;  $t_{\text{major}} = 40.3$  min,  $t_{\text{minor}} = 49.2$  min].

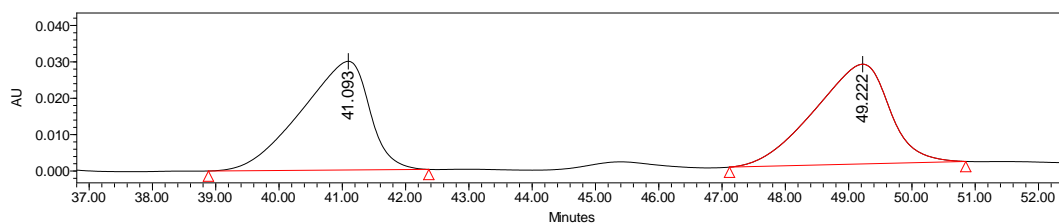

|   | Retention Time | Area    | % Area | Height | % Height |
|---|----------------|---------|--------|--------|----------|
| 1 | 41.093         | 2247758 | 49.71  | 29865  | 52.16    |
| 2 | 49.222         | 2273948 | 50.29  | 27395  | 47.84    |

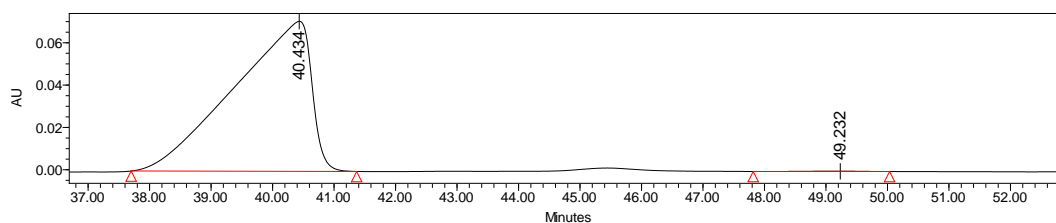

|   | Retention Time | Area    | % Area | Height | % Height |
|---|----------------|---------|--------|--------|----------|
| 1 | 40.434         | 6188245 | 99.88  | 70901  | 99.84    |
| 2 | 49.232         | 7469    | 0.12   | 113    | 0.16     |

N-((8*S*)-8*b*-(Hydroxymethyl)-1-methylene-4,4-dioxido-2,8*b*-dihydro-1*H*-azeto[1,2-*b*]benzo[*d*]isothiazol-2-yl)-4-methyl-*N*-phenylbenzenesulfonamide (**10**)

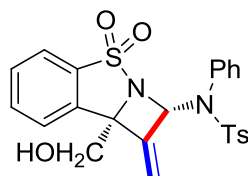

To a solution of **3aa** (104.9 mg, 0.2 mmol) in 2.0 mL THF was added 2.0 equiv.  $\text{LiAlH}_4$  at 0 °C. The resulting mixture was then stirred at 25 °C for 1.0 h until the reaction was completed (monitored by TLC). The solvent was then removed under vacuum and the residue was purified by chromatography on silica gel, eluting with ethyl acetate/petroleum ether 1:1 (v/v) to afford compound **10**. light yellow solid, 90% yield, m.p. 116-118 °C,  $[\alpha]_D^{15} = 17.7$  (c 1.0,  $\text{CH}_2\text{Cl}_2$ ), 99% ee [Lux 5u Cellulose-2 column (25 cm  $\times$  0.46 cm ID), n-hexane/*i*-PrOH = 80/20, 0.8 mL/min, 254 nm;  $t_{\text{major}} = 38.7$  min,  $t_{\text{minor}} = 36.4$  min];  $^1\text{H}$  NMR (500 MHz,  $\text{CDCl}_3$ )  $\delta$  7.70 (dd,  $J = 8.5, 2.0$  Hz, 3H), 7.42-7.47 (m, 2H), 7.33 (dt,  $J = 21.0, 7.0$  Hz, 5H), 7.12-7.14 (m, 2H), 6.95 (t,  $J = 2.0$  Hz, 1H), 5.87 (d,  $J = 8.0$  Hz, 1H), 5.81 (s, 1H), 5.37 (dd,  $J = 2.0, 1.0$  Hz, 1H), 4.94 (s, 1H), 4.11 (d,  $J = 10.0$  Hz, 1H), 3.69 (d,  $J = 9.5$  Hz, 1H), 2.46 (s, 3H).  $^{13}\text{C}$  NMR (125 MHz,  $\text{CDCl}_3$ )  $\delta$  148.7, 144.0, 138.9, 137.1, 136.3, 135.4, 133.4, 133.2, 129.9, 129.6, 129.3, 129.0, 128.2, 124.1, 121.0, 118.2, 90.7, 78.3, 69.0, 21.6. HRMS  $m/z$  (ESI<sup>+</sup>): Calculated for  $\text{C}_{24}\text{H}_{23}\text{N}_2\text{O}_5\text{S}_2$  ( $[\text{M}+\text{H}]^+$ ) 483.1043, found 483.1052.

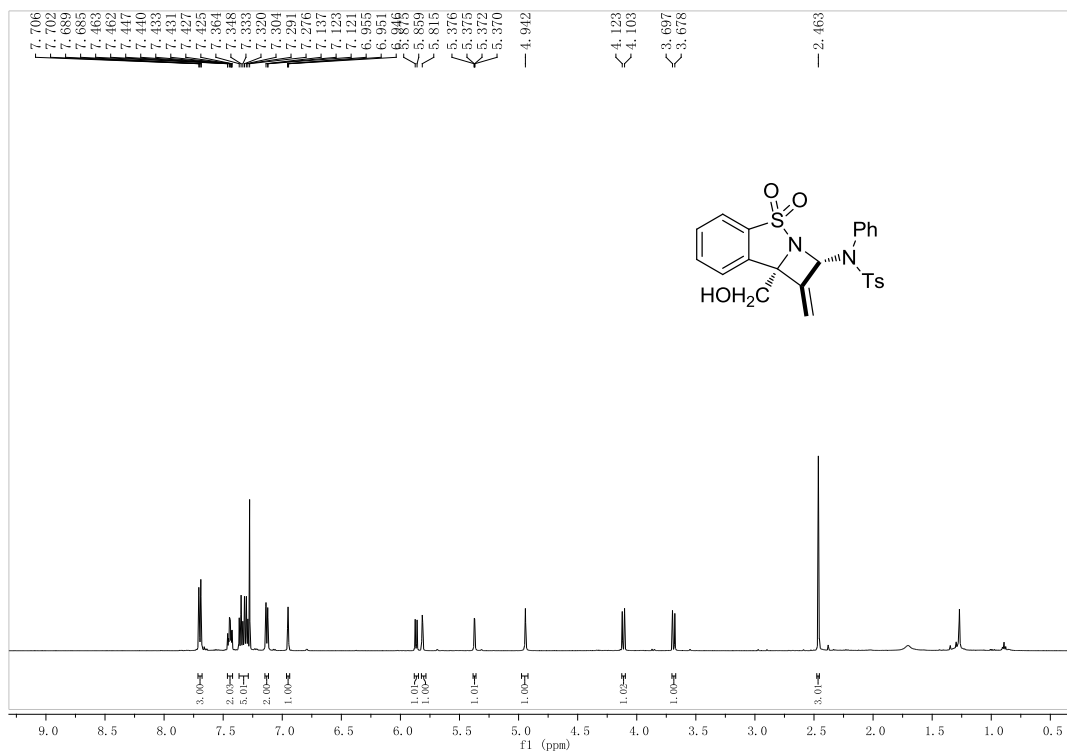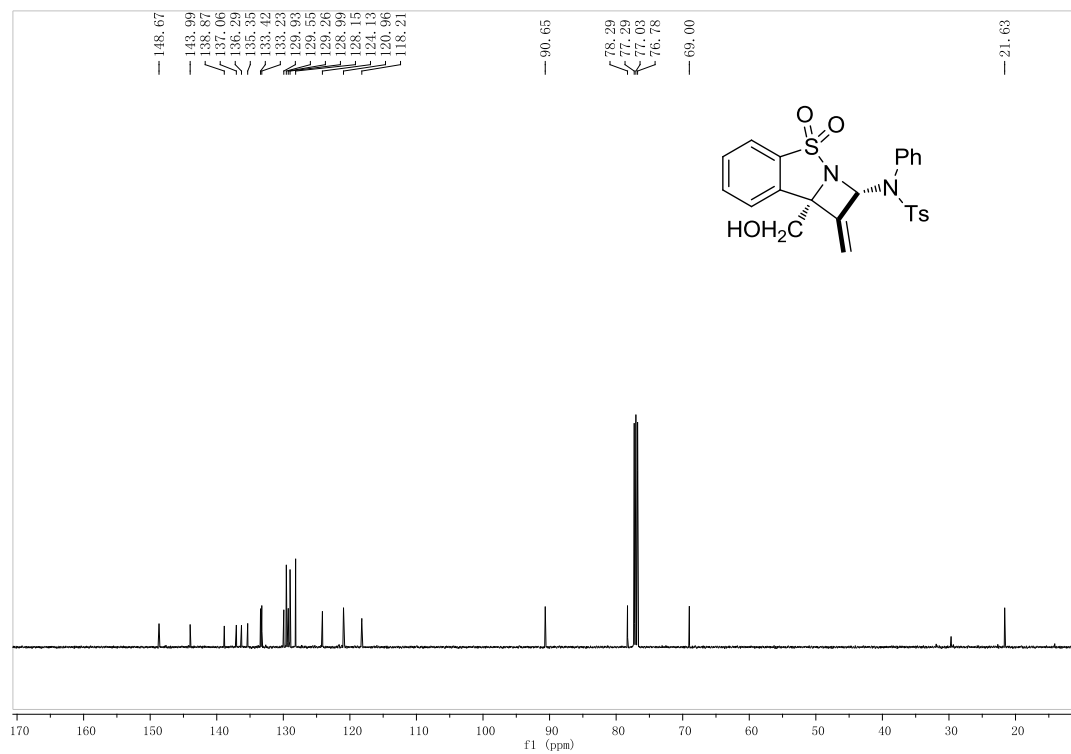

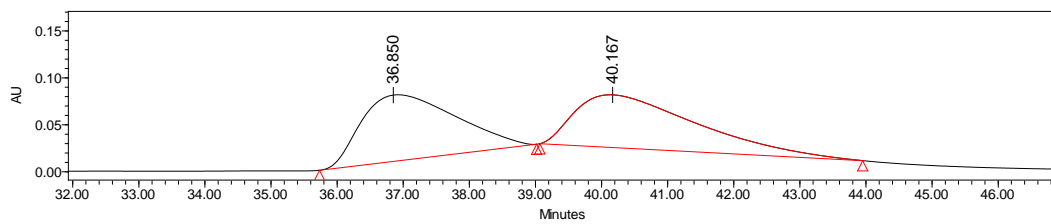

|   | Retention Time | Area    | % Area | Height | % Height |
|---|----------------|---------|--------|--------|----------|
| 1 | 36.850         | 6944893 | 50.41  | 70321  | 56.81    |
| 2 | 40.167         | 6831750 | 49.59  | 53472  | 43.19    |

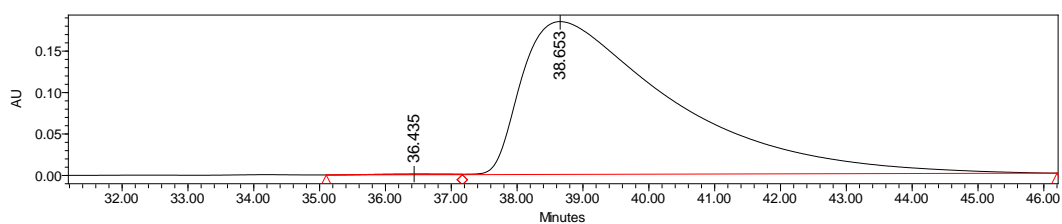

|   | Retention Time | Area     | % Area | Height | % Height |
|---|----------------|----------|--------|--------|----------|
| 1 | 36.435         | 67635    | 0.23   | 832    | 0.45     |
| 2 | 38.653         | 29434220 | 99.77  | 184291 | 99.55    |



#### 4. Crystal report of compound 3aa:

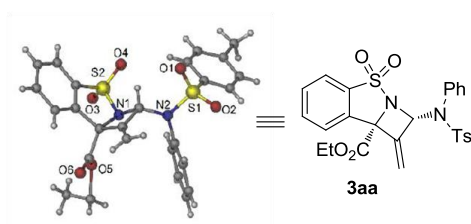


---

|                        |                                                                              |                                                                              |
|------------------------|------------------------------------------------------------------------------|------------------------------------------------------------------------------|
| Bond precision:        | C-C = 0.0053 Å                                                               | Wavelength=0.71073                                                           |
| Cell:                  | a=8.7715(4)      b=15.9157(8)      c=36.3389(18)                             |                                                                              |
|                        | alpha=90      beta=90      gamma=90                                          |                                                                              |
| Temperature:           | 296 K                                                                        |                                                                              |
|                        | Calculated                                                                   | Reported                                                                     |
| Volume                 | 5073.1(4)                                                                    | 5073.1(4)                                                                    |
| Space group            | P 21 21 21                                                                   | P2(1)2(1)2(1)                                                                |
| Hall group             | P 2ac 2ab                                                                    | ?                                                                            |
| Moiety formula         | C <sub>26</sub> H <sub>24</sub> N <sub>2</sub> O <sub>6</sub> S <sub>2</sub> | ?                                                                            |
| Sum formula            | C <sub>26</sub> H <sub>24</sub> N <sub>2</sub> O <sub>6</sub> S <sub>2</sub> | C <sub>26</sub> H <sub>24</sub> N <sub>2</sub> O <sub>6</sub> S <sub>2</sub> |
| Mr                     | 524.59                                                                       | 524.59                                                                       |
| Dx, g cm <sup>-3</sup> | 1.374                                                                        | 1.374                                                                        |
| Z                      | 8                                                                            | 8                                                                            |
| Mu (mm <sup>-1</sup> ) | 0.254                                                                        | 0.254                                                                        |
| F000                   | 2192.0                                                                       | 2192.0                                                                       |
| F000'                  | 2194.99                                                                      |                                                                              |
| h, k, lmax             | 10, 18, 43                                                                   | 10, 18, 42                                                                   |
| Nref                   | 8959[ 5039]                                                                  | 8949                                                                         |
| Tmin, Tmax             | 0.885, 0.922                                                                 | 0.888, 0.923                                                                 |
| Tmin'                  | 0.885                                                                        |                                                                              |
| Correction method=     | # Reported T Limits: Tmin=0.888 Tmax=0.923                                   |                                                                              |
| AbsCorr =              | MULTI-SCAN                                                                   |                                                                              |
| Data completeness=     | 1.78/1.00                                                                    | Theta(max)= 25.010                                                           |
| R(reflections)=        | 0.0420( 7514)                                                                | wR2(reflections)= 0.1043( 8949)                                              |
| S =                    | 1.065                                                                        | Npar= 649                                                                    |

---

## 5. References:

1. S. Suárez-Pantiga, C. Hernández-Dáz, M. Piedrafita, E. Rubio and J. González, *Adv. Synth. Catal.* 2012, **354**, 1651.
2. L.-L. Wei, J. A. Mulder, H. Xiong, C. A. Zifcick, C. J. Douglas and R. P. Hsung, *Tetrahedron* 2001, **57**, 459.
3. H. Wang, T. Jiang and M.-H. Xu, *J. Am. Chem. Soc.*, 2013, **135**, 971.
4. Q. An, J. Shen, N. Butt, D. Liu, Y. Liu, and W. Zhang, *Org. Lett.*, 2014, **16**, 4496.
